# Supplementary material for: Reducing scalp pain for pTES of motor cortex using background hums
Source: Research Square preprint supplement (doi:10.21203/rs.3.rs-6273135/v1), 2025-04-10

Reducing scalp pain for pTES of motor cortex using background hums

Mats Forssell,Rabira Tusi, Jeehyun Kim, Max Murphy, Jonathan Shulgach, Prakash Yadav, Alonso Buitano Tang, Maya Maurer, Vishal Jain, Douglas J Weber, Benedict J Alter, and Pulkit Grover

Supplementary Information:


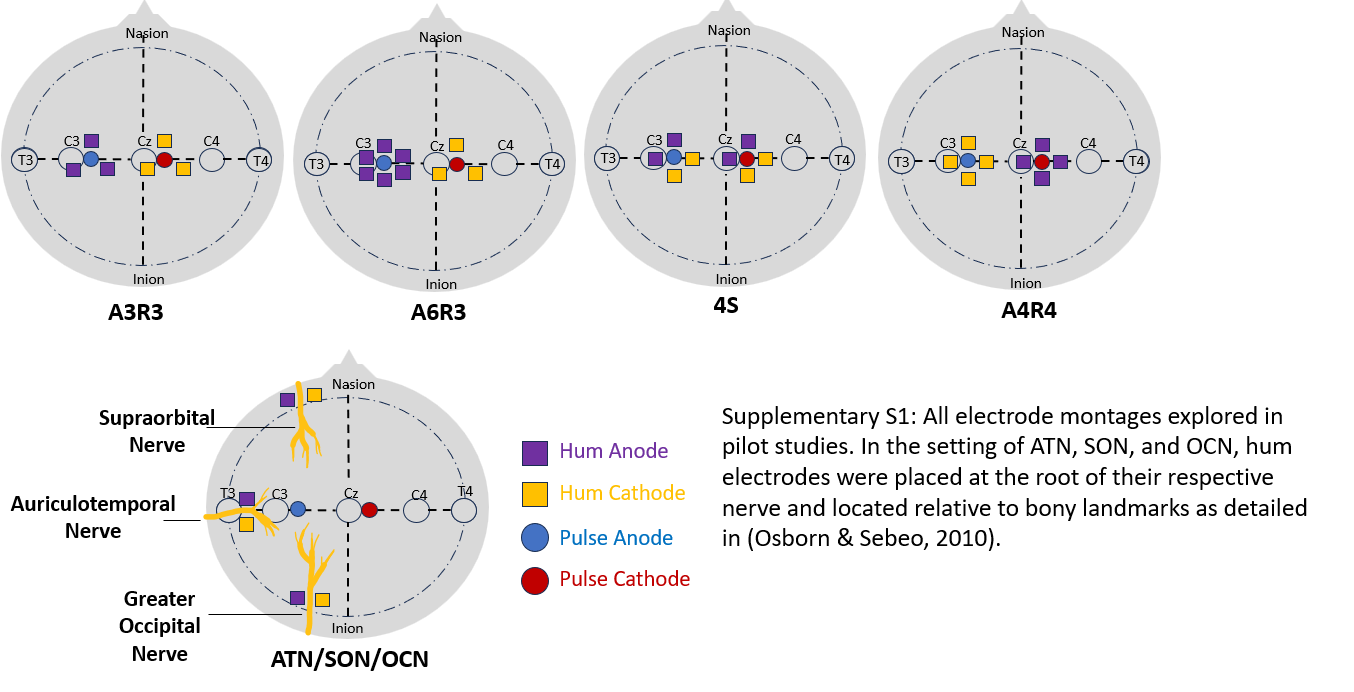

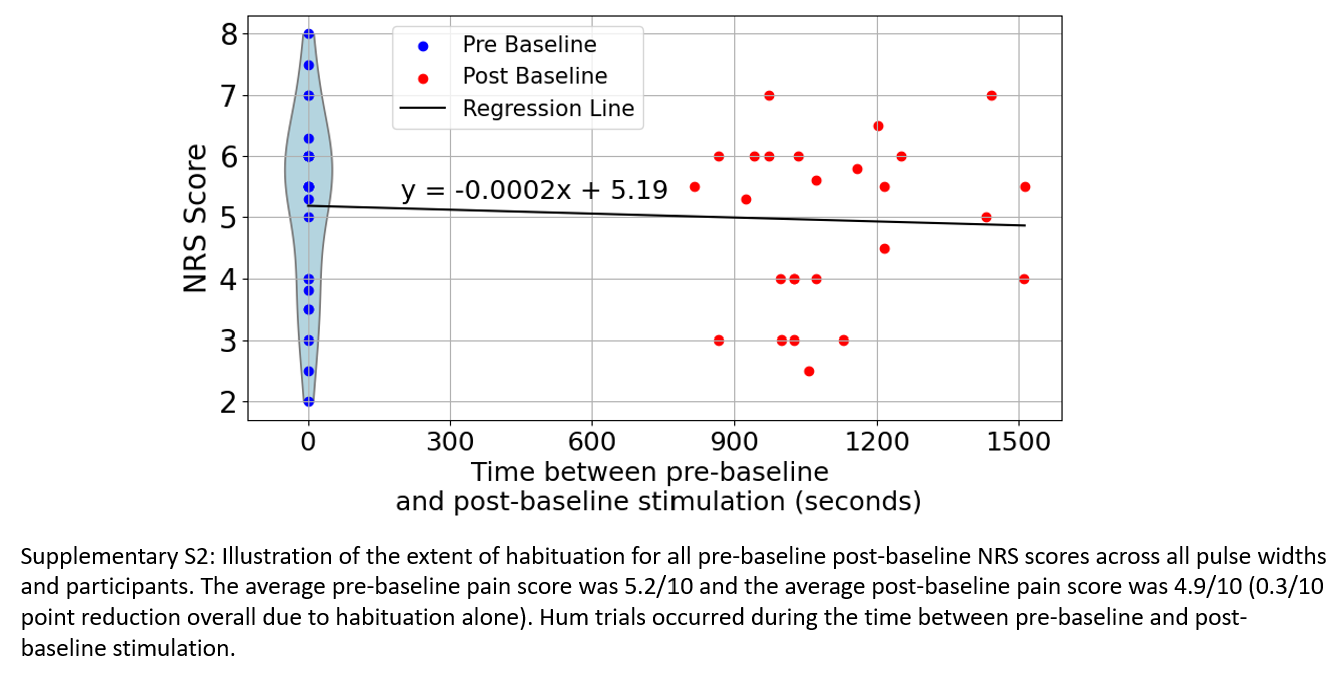

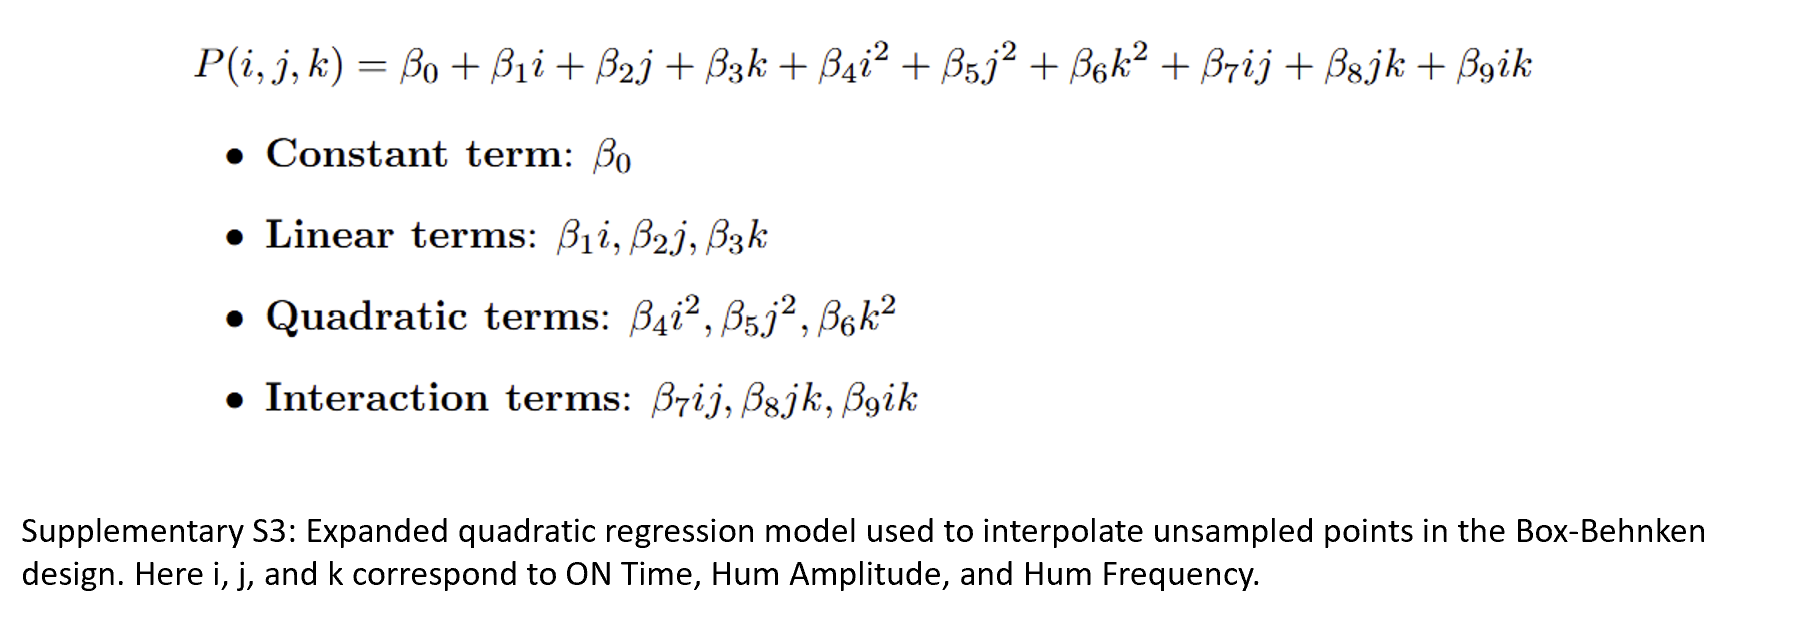

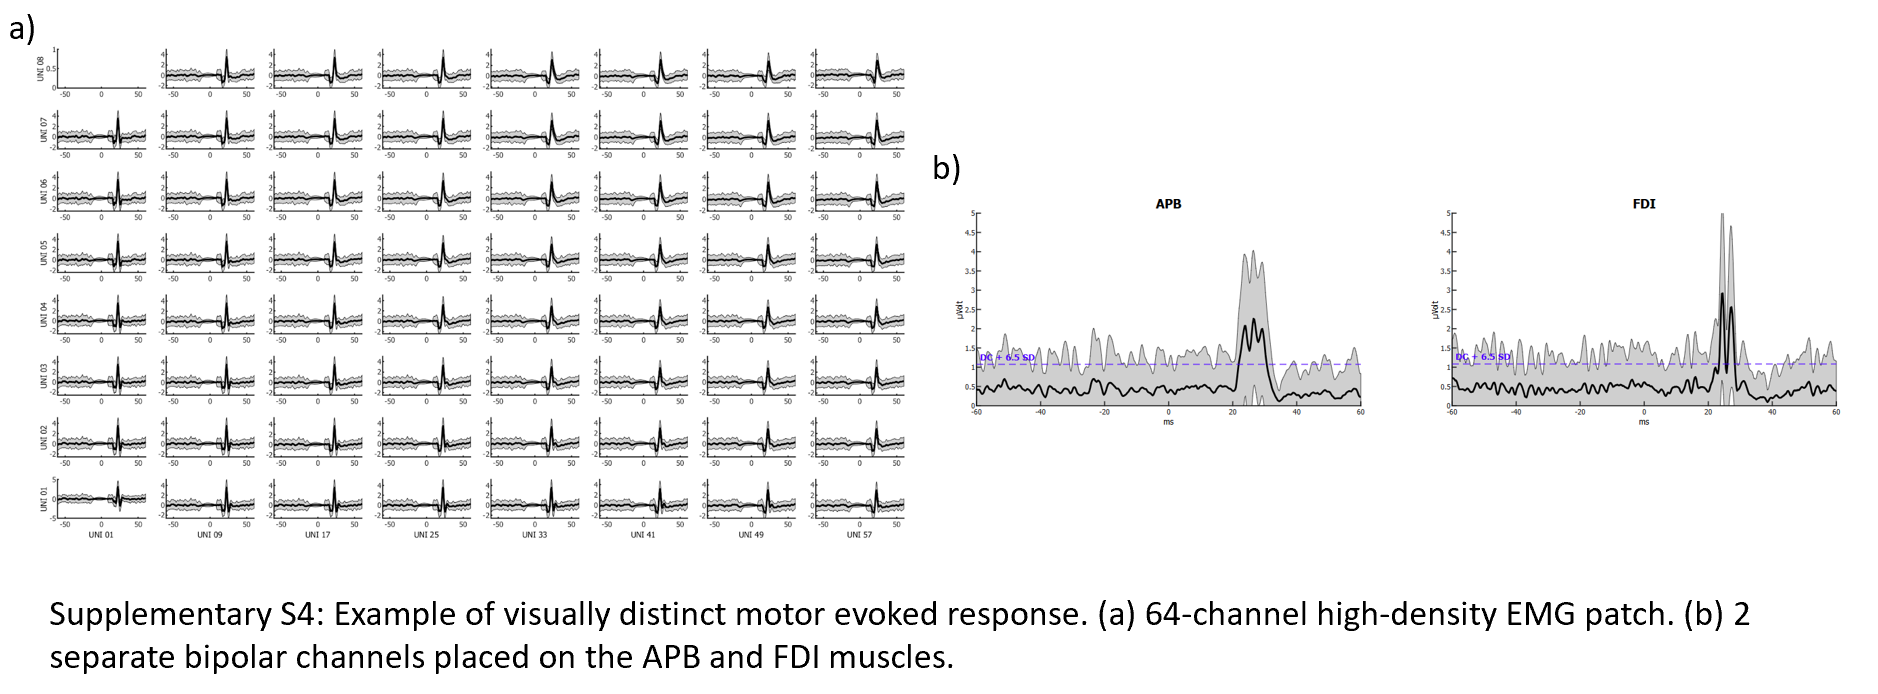

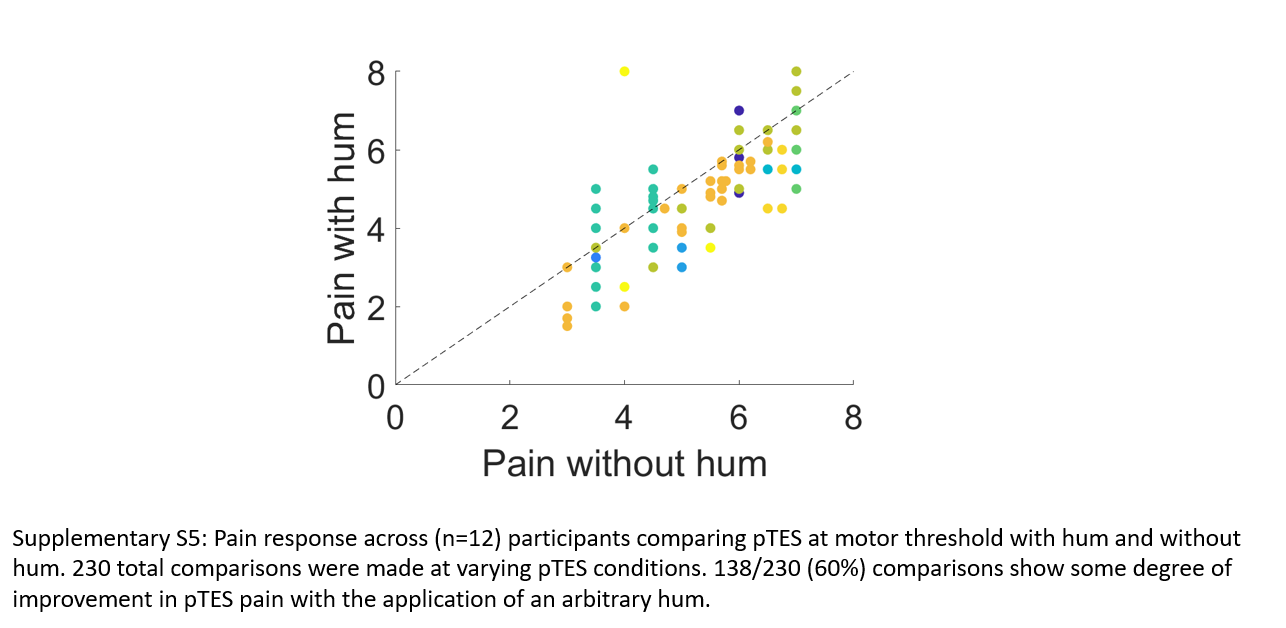

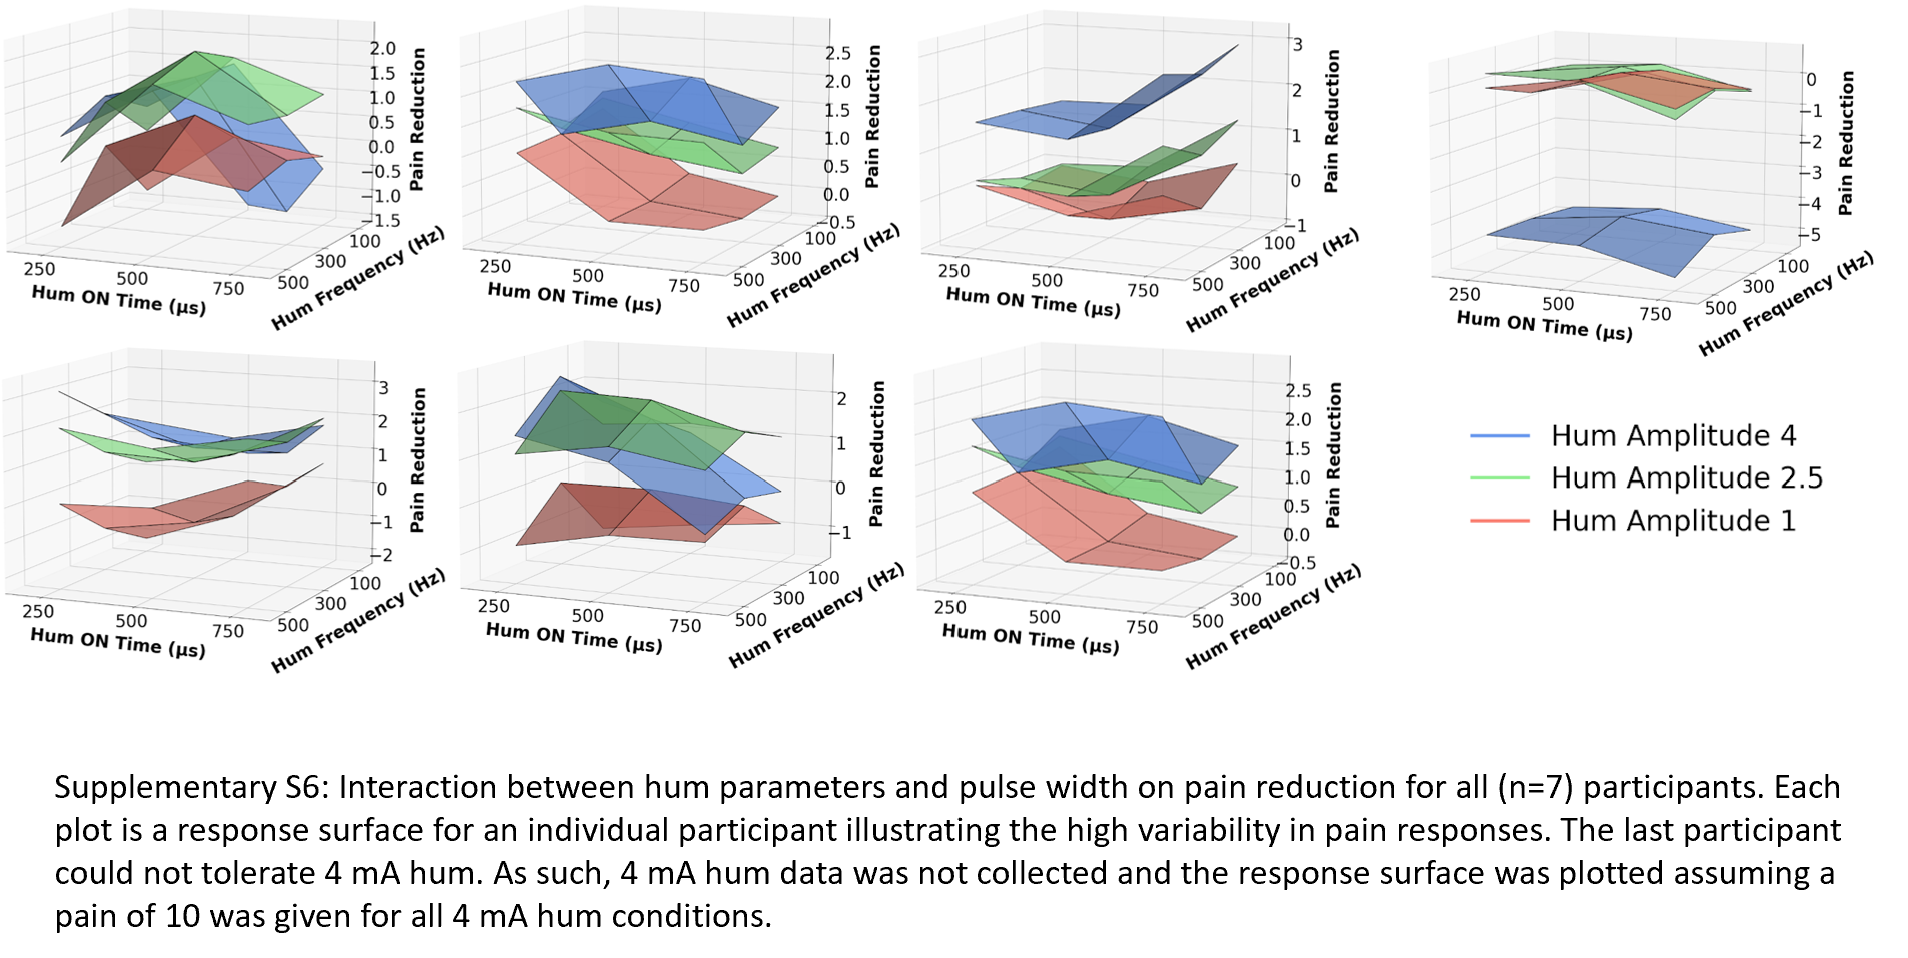

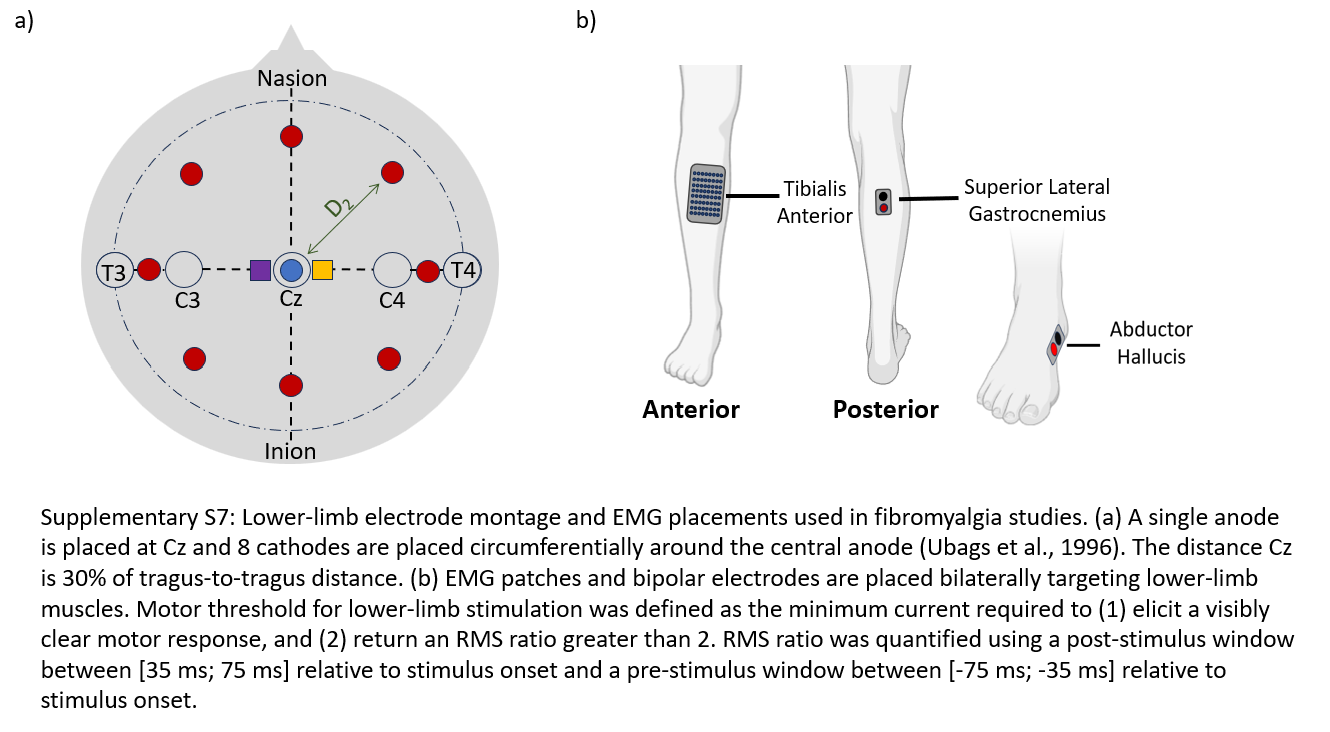

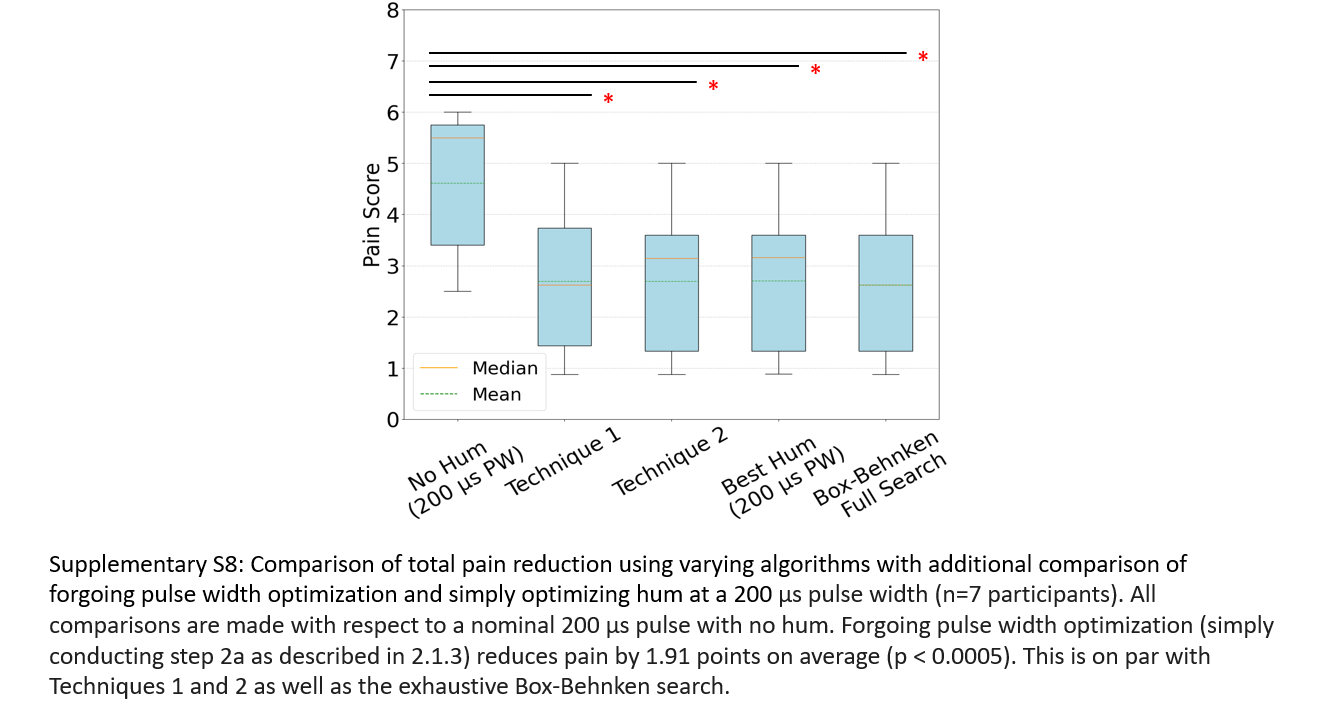

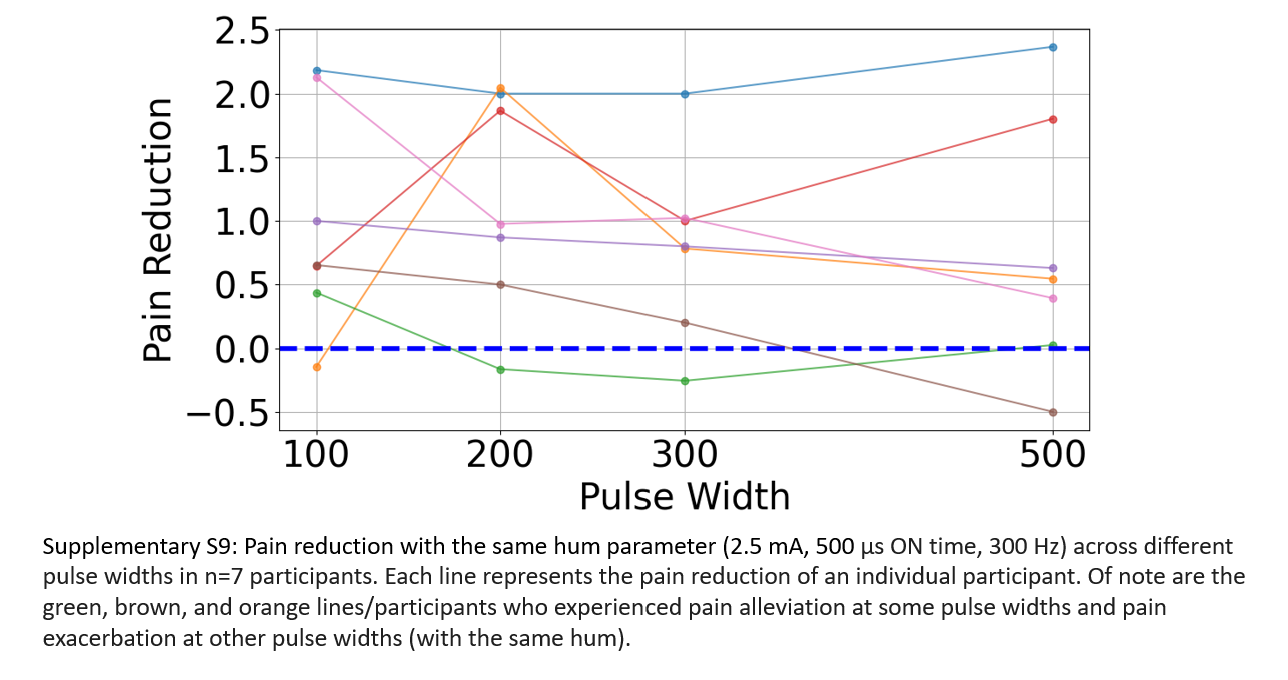

Supplement: Supplementary file 1 [file 760d629754e2c0c10a92c136.docx]
