# Supplementary material for: Reducing scalp pain for pTES of motor cortex using background hums
Source: Research Square preprint supplement (doi:10.21203/rs.3.rs-6273135/v1), 2025-04-10
Supplement: Supplementary file 2 [file 8e29b76560ddd0de648993a0.xlsx]

## Sheet: Sheet1
Experiment	Subject	Current (mA)	Pulse Width	Frequency (Hz)	Number of Pulses	Pulse Active	Pulse Return	Location	Hum Current (mA)	On Time	Hum Frequency	Hum Duration	MEP Pulse Time	Modulation	Pain
Pilot w/ Hum	NG	140	100	1	30	C3+2	Cz+2	A6R3	-10	0.1	100	100	1		7
Pilot w/ Hum	NG	140	100	1	30	C3+2	Cz+2	A6R3	10	0.1	100	100	1		7
Pilot w/ Hum	NG	140	100	0.5	30	C3+2	Cz+2	A6R3	5	0.1	100	1000	0.95		7
Pilot w/ Hum	NG	140	100	0.5	30	C3+2	Cz+2	A6R3	10	0.1	100	1000	0.95		7.5
Pilot w/ Hum	NG	140	100	0.5	30	C3+2	Cz+2	A6R3	15	0.1	100	1000	0.95		7.5
Pilot w/ Hum	NG	140	100	0.5	30	C3+2	Cz+2	A6R3	20	0.1	100	1000	0.95		7.5
Pilot w/ Hum	NG	140	100	0.5	30	C3+2	Cz+2	A6R3	30	0.1	100	1000	0.95		6.5
Pilot w/ Hum	NG	140	100	0.5	30	C3+2	Cz+2	A6R3	-30	0.1	100	1000	0.95		6.5
Pilot w/ Hum	QH	35	300	0.5	10	C3+2	Cz+2	A3R3	-5	1	100	1000	0.95		0
Pilot w/ Hum	QH	35	300	0.5	10	C3+2	Cz+2	A3R3	5	1	100	1000	0.95		0
Pilot w/ Hum	NN	55	300	0.5	20	C3+2	Cz+2	A3R3	5	1	100	100			3
Pilot w/ Hum	NN	55	300	0.5	20	C3+2	Cz+2	A3R3	10	1	100	100			4.5
Pilot w/ Hum	NN	55	300	0.5	20	C3+2	Cz+2	A3R3	7	1	100	100			4
Pilot w/ Hum	NN	55	300	0.5	20	C3+2	Cz+2	A3R3	3	1	100	100			4.5
Pilot w/ Hum	NN	55	300	0.5	20	C3+2	Cz+2	A3R3	5	1	100	100			3.5
Pilot w/ Hum	QH	40	300	1		C3+2	Cz+2	A3R3	8	0.3	100	0		C	3.5
Pilot w/ Hum	P9	60	300	0.5	15	C3+2	Cz+2	A3R3	5	1	100	1000			4.5
Pilot w/ Hum	P9	60	300	0.5	15	C3+2	Cz+2	A3R3	5	1	100	100			4.5
Pilot w/ Hum	P9	60	300	0.5	15	C3+2	Cz+2	A3R3	5	1	100	100			4.5
Pilot w/ Hum	P9	60	300	0.5	15	C3+2	Cz+2	A3R3	5	1	100	100		R50	4.5
Pilot w/ Hum	P9	60	300	0.5	15	C3+2	Cz+2	A3R3	2	1	100	0		C	4.5
Pilot w/ Hum	P9	60	300	0.5	15	C3+2	Cz+2	A3R3	4	1	100	0		C	6.5
Pilot w/ Hum	P9	60	300	0.5	15	C3+2	Cz+2	A3R3Ps	2	1	100	1000			6.5
Pilot w/ Hum	P9	60	300	0.5	15	C3+2	Cz+2	A3R3Ps	5	1	100	1000			6.5
Pilot w/ Hum	P9	60	300	0.5	15	C3+2	Cz+2	A3R3Ps	-5	1	100	1000			6.5
Pilot w/ Hum	P11	45	300	0.5	15	C4-2	Cz-2	A3R3	5	1	100	1000	0.95		2
Pilot w/ Hum	P11	45	300	0.5	15	C4-2	Cz-2	A3R3	3	1	200	1000	0.95		2.5
Pilot w/ Hum	P11	45	300	0.5	15	C4-2	Cz-2	A3R3	5	1	100	1000	0.5		2.5
Pilot w/ Hum	P11	45	300	0.5	15	C4-2	Cz-2	A3R3	2	1	100	1000	0.95		3
Pilot w/ Hum	P11	45	300	0.5	15	C4-2	Cz-2	A3R3	5	1	100	200	0.9		3.25
Pilot w/ Hum	P11	45	300	0.5	15	C4-2	Cz-2	A3R3	5	1	100	0		C	2
Pilot w/ Hum	P9	65	300	0.5	15	C3+2	Cz+2	A3R3	2	1	100	1000		R50	7
Pilot w/ Hum	P9	65	300	0.5	15	C3+2	Cz+2	A3R3	2	1	100	1000		R50	7
Pilot w/ Hum	P9	70	300	0.5	15	C3+2	Cz+2	A3R3	5	1	100	1000		R50	7
Pilot w/ Hum	P9	70	300	0.5	15	C3+2	Cz+2	A3R3	5	1	100	1000			6
Pilot w/ Hum	P9	70	300	0.5	15	C3+2	Cz+2	A3R3	2	1	100	1000			6.5
Pilot w/ Hum	QH	70	300	0.5	10	Cz	5el,10cm	C1/C2	5	1	100	1000		R90	0
Pilot w/ Hum	QH	70	300	0.5	10	Cz	5el,10cm	C1/C2	4	1	100	1000		R90	0
Pilot w/ Hum	QH	70	300	0.5	10	Cz	5el,10cm	C1/C2	3	1	100	1000	0.95	R90	0
Pilot w/ Hum	P14	30	300	0.5	10	C3+2	Cz+2	A3R3	2	1	100	1000	0.9	R90	4
Pilot w/ Hum	P14	30	300	0.5	10	C3+2	Cz+2	A3R3	3	1	100	1000	0.9	R90	3.5
Pilot w/ Hum	P14	30	300	0.5	10	C3+2	Cz+2	A3R3	4	1	100	1000	0.9	R90	3
Pilot w/ Hum	P15	67	200	0.5	10	C3+2	Cz+2	A4R4	3	1	100	1000	0.9		5.5
Pilot w/ Hum	P15	67	200	0.5	10	C3+2	Cz+2	A4R4	3	1	100	1000	0.9	R90	5
Pilot w/ Hum	P15	67	200	0.5	10	C3+2	Cz+2	A4R4	3	1	100	300	0.83	R67	5
Pilot w/ Hum	P15	67	200	0.5	10	C3+2	Cz+2	A4R4	6	1	100	300	0.83	R67	6.5
Pilot w/ Hum	P15	67	200	0.5	10	C3+2	Cz+2	A4R4	3	1	300	300	0.83	R67	5
Pilot w/ Hum	P15	67	200	0.5	10	C3+2	Cz+2	A4R4	3	1	30	300	0.83	R67	5.5
Pilot w/ Hum	P15	67	200	0.5	10	C3+2	Cz+2	A4R4	6	1	30	300	0.83	R67	5.5
Pilot w/ Hum	P15	67	200	1	20	C3+2	Cz+2	A4R4	3	1	300	300	0.83	R67	5.5
Pilot w/ Hum	P15	67	200	1	20	C3+2	Cz+2	A4R4	3	1	300	300	0.83	R67	5
Pilot w/ Hum	P20	13	300			C3+2	Cz	OCN	3	1	3	0		C	5
Pilot w/ Hum	P9	60	300	1	20	C3+2	Cz+2	C3/Cz	3	1	300	300	0.83	R67	6
Pilot w/ Hum	P9	60	300	1	20	C3+2	Cz+2	C3/Cz	3	1	300	300	0.83	R67	6.5
Pilot w/ Hum	P9	60	300	1	20	C3+2	Cz+2	C3/Cz	3	1	300	300	0.83	R67	6.5
Pilot w/ Hum	P20	13	300			C3	Cz	OCN	5	1	3	0		C	4.7
Pilot w/ Hum	P9	60	300	1	20	C3+2	Cz+2	SON	3	1	300	300	0.83	R67	6
Pilot w/ Hum	P9	60	300	1	20	C3+2	Cz+2	SON	3	1	300	300	0.83	R67	6
Pilot w/ Hum	P9	60	300	1	20	C3+2	Cz+2	SON	3	1	300	300	0.83	R67	6
Pilot w/ Hum	P20	13	300			C3	Cz	OCN	10	1	3	0		C	5
Pilot w/ Hum	P20	13	300			C3	Cz	OCN	1	1	100	0		C	4.8
Pilot w/ Hum	P20	13	300			C3	Cz	OCN	3	1	100	0		C	4.8
Pilot w/ Hum	P20	13	300			C3	Cz	OCN	5	1	100	0		C	3.5
Pilot w/ Hum	P20	13	300			C3	Cz	OCN	7	1	100	0		C	3
Pilot w/ Hum	P20	13	300			C3	Cz	OCN	0.1	0.1	5	0		C	5
Pilot w/ Hum	P20	13	300			C3	Cz	OCN	0.5	0.1	5	0		C	5
Pilot w/ Hum	P20	13	300			C3	Cz	OCN	1	0.1	5	0		C	5
Pilot w/ Hum	P20	13	300			C3	Cz	OCN	2	0.1	5	0		C	5
Pilot w/ Hum	P20	13	300			C3	Cz	OCN	5	0.1	5	0		C	5
Pilot w/ Hum	P20	13	300			C3	Cz	OCN	3	1	3	0		C	5
Pilot w/ Hum	P20	13	300			C3	Cz	OCN	5	1	3	0		C	5
Pilot w/ Hum	P20	13	300			C3	Cz	OCN	10	1	3	0		C	5
Pilot w/ Hum	P20	13	300			C3	Cz	OCN	3	1	100	0		C	5
Pilot w/ Hum	P20	13	300			C3	Cz	OCN	5	1	100	0		C	5
Pilot w/ Hum	P20	13	300			C3	Cz	OCN	7	1	100	0		C	4.5
Pilot w/ Hum	P20	13	300			C3	Cz	OCN	1	0.1	5	0		C	4.5
Pilot w/ Hum	P20	13	300			C3	Cz	OCN	3	0.1	5	0		C	5
Pilot w/ Hum	P20	13	300			C3	Cz	OCN	5	0.1	5	0		C	4.5
Pilot w/ Hum	P20	13	300			C3	Cz	OCN	3	1	3	0		C	4.5
Pilot w/ Hum	P20	13	300			C3	Cz	OCN	5	1	3	0		C	4
Pilot w/ Hum	P20	13	300			C3	Cz	OCN	10	1	3	0		C	4.5
Pilot w/ Hum	P20	13	300			C3	Cz	OCN	1	1	100	0		C	5
Pilot w/ Hum	P20	13	300			C3	Cz	OCN	5	1	100	0		C	4
Pilot w/ Hum	P20	13	300			C3	Cz	OCN	10	1	100	0		C	3.5
Pilot w/ Hum	P20	13	300			C3	Cz	OCN	1	0.1	5	0		C	4.5
Pilot w/ Hum	P20	13	300			C3	Cz	OCN	3	0.1	5	0		C	4
Pilot w/ Hum	P20	13	300			C3	Cz	OCN	5	0.1	5	0		C	3
Pilot w/ Hum	P20	13	300			C3	Cz	ATN	3	1	3	0		C	4
Pilot w/ Hum	P20	13	300			C3	Cz	ATN	5	1	3	0		C	4
Pilot w/ Hum	P20	13	300			C3	Cz	ATN	7	1	3	0		C	4
Pilot w/ Hum	P20	13	300			C3	Cz	ATN	1	1	100	0		C	3.5
Pilot w/ Hum	P20	13	300			C3	Cz	ATN	3	1	100	0		C	2.5
Pilot w/ Hum	P20	13	300			C3	Cz	ATN	5	1	100	0		C	3
Pilot w/ Hum	P20	13	300			C3	Cz	ATN	1	0.1	5	0		C	4.5
Pilot w/ Hum	P20	13	300			C3	Cz	ATN	3	0.1	5	0		C	4
Pilot w/ Hum	P20	13	300			C3	Cz	ATN	5	0.1	5	0		C	4
Pilot w/ Hum	P20	13	300			C3	Cz	ATN	3	1	3	0		C	4
Pilot w/ Hum	P20	13	300			C3	Cz	ATN	5	1	3	0		C	4
Pilot w/ Hum	P20	13	300			C3	Cz	ATN	7	1	3	0		C	4
Pilot w/ Hum	P20	13	300			C3	Cz	ATN	1	1	100	0		C	4.5
Pilot w/ Hum	P20	13	300			C3	Cz	ATN	3	1	100	0		C	4
Pilot w/ Hum	P20	13	300			C3	Cz	ATN	5	1	100	0		C	3
Pilot w/ Hum	P20	13	300			C3	Cz	ATN	1	0.1	5	0		C	4
Pilot w/ Hum	P20	13	300			C3	Cz	ATN	3	0.1	5	0		C	3.5
Pilot w/ Hum	P20	13	300			C3	Cz	ATN	5	0.1	5	0		C	3.5
Pilot w/ Hum	P20	13	300			C3	Cz	ATN	7	0.1	5	0		C	3
Pilot w/ Hum	P20	13	300			C3	Cz	SON	3	1	3	0		C	3
Pilot w/ Hum	P20	13	300			C3	Cz	SON	5	1	3	0		C	3.5
Pilot w/ Hum	P20	13	300			C3	Cz	SON	7	1	3	0		C	4
Pilot w/ Hum	P20	13	300			C3	Cz	SON	10	1	3	0		C	5
Pilot w/ Hum	P20	13	300			C3	Cz	SON	1	1	100	0		C	3
Pilot w/ Hum	P20	13	300			C3	Cz	SON	3	1	100	0		C	2
Pilot w/ Hum	P20	13	300			C3	Cz	SON	5	1	100	0		C	2.5
Pilot w/ Hum	P20	13	300			C3	Cz	SON	7	1	100	0		C	3
Pilot w/ Hum	P20	13	300			C3	Cz	SON	1	0.1	5	0		C	3
Pilot w/ Hum	P20	13	300			C3	Cz	SON	3	0.1	5	0		C	3
Pilot w/ Hum	P20	13	300			C3	Cz	SON	5	0.1	5	0		C	3.5
Pilot w/ Hum	P20	13	300			C3	Cz	SON	7	0.1	5	0		C	4
Pilot w/ Hum	P20	13	300			C3	Cz	SON	3	1	3	0		C	4
Pilot w/ Hum	P20	13	300			C3	Cz	SON	5	1	3	0		C	4.5
Pilot w/ Hum	P20	13	300			C3	Cz	SON	7	1	3	0		C	5
Pilot w/ Hum	P20	13	300			C3	Cz	SON	1	1	100	0		C	3
Pilot w/ Hum	P20	13	300			C3	Cz	SON	3	1	100	0		C	2.5
Pilot w/ Hum	P20	13	300			C3	Cz	SON	5	1	100	0		C	2.5
Pilot w/ Hum	P20	13	300			C3	Cz	SON	7	1	100	0		C	3.5
Pilot w/ Hum	P20	13	300			C3	Cz	SON	1	0.1	5	0		C	3
Pilot w/ Hum	P20	13	300			C3	Cz	SON	3	0.1	5	0		C	3
Pilot w/ Hum	P9	60	300	1	20	C3+2	Cz+2	C3/Cz	3	1	300	300	0.83	R67	5.5
Pilot w/ Hum	P9	60	300	1	20	C3+2	Cz+2	SON	3	1	300	300	0.83	R67	5.5
Pilot w/ Hum	P9	60	300	1	20	C3+2	Cz+2	SON	5	1	300	300	0.83	R67	0
Pilot w/ Hum	P9	60	300	1	20	C3+2	Cz+2	SON	5	1	300	100	0.9	R90	6
Pilot w/ Hum	P13	45	300	0.5	20	C3+2	Cz+2	2S	3	1	100	1000	0.9	R90	5
Pilot w/ Hum	P13	50	300	0.5	20	C3+2	Cz+2	2S	5	1	100	1000	0.9	R90	4.5
Pilot w/ Hum	P13	55	300	0.5	20	C3+2	Cz+2	2S	7	1	100	1000	0.9	R90	4.5
Pilot w/ Hum	P13	55	300	0.5	20	C3+2	Cz+2	2S	5	1	100	1000	0.9	R90	4.5
Pilot w/ Hum	P13	50	200	0.5	20	C3+2	Cz+2	2S	5	1	100	1000	0.9	R90	5
Pilot w/ Hum	P13	55	200	0.5	20	C3+2	Cz+2	2S	7	1	100	1000	0.9	R90	5.5
Pilot w/ Hum	P13	60	200	0.5	20	C3+2	Cz+2	2S	7	1	100	1000	0.9	R90	5.5
Pilot w/ Hum	P13	60	100	0.5	20	C3+2	Cz+2	2S	7	1	100	1000	0.9	R90	4.5
Pilot w/ Hum	P13	70	100	0.5	20	C3+2	Cz+2	2S	7	1	100	1000	0.9	R90	5
Pilot w/ Hum	P13	80	100	0.5	20	C3+2	Cz+2	2S	7	1	100	1000	0.9	R90	6
Pilot w/ Hum	P13	85	100	0.5	20	C3+2	Cz+2	2S	7	1	100	1000	0.9	R90	6
Pilot w/ Hum	P13	85	100	0.5	20	C3+2	Cz+2	2S	7	1	100	1000	0.9	R90	2
Pilot w/ Hum	P13	90	50	0.5	20	C3+2	Cz+2	2S	7	1	100	1000	0.9	R90	4
Pilot w/ Hum	P13	100	50	0.5	20	C3+2	Cz+2	2S	7	1	100	1000	0.9	R90	5
Pilot w/ Hum	P13	110	50	0.5	20	C3+2	Cz+2	2S	7	1	100	1000	0.9	R90	5
Pilot w/ Hum	P13	120	50	0.5	20	C3+2	Cz+2	2S	7	1	100	1000	0.9	R90	5.5
Pilot w/ Hum	P13	130	50	0.5	20	C3+2	Cz+2	2S	7	1	100	1000	0.9	R90	5.5
Pilot w/ Hum	P13	10	500	0.5	20	C3+2	Cz+2	2S	7	1	100	1000	0.9	R90	0
Pilot w/ Hum	P13	20	500	0.5	20	C3+2	Cz+2	2S	7	1	100	1000	0.9	R90	1
Pilot w/ Hum	P13	30	500	0.5	20	C3+2	Cz+2	2S	7	1	100	1000	0.9	R90	3
Pilot w/ Hum	P13	40	500	0.5	20	C3+2	Cz+2	2S	7	1	100	1000	0.9	R90	5
Pilot w/ Hum	P13	10	1000	0.5	20	C3+2	Cz+2	2S	7	1	100	1000	0.9	R90	0
Pilot w/ Hum	P13	20	1000	0.5	20	C3+2	Cz+2	2S	7	1	100	1000	0.9	R90	2
Pilot w/ Hum	P13	30	1000	0.5	20	C3+2	Cz+2	2S	7	1	100	1000	0.9	R90	3.5
Pilot w/ Hum	P13	35	1000	0.5	20	C3+2	Cz+2	2S	7	1	100	1000	0.9	R90	4
Pilot w/ Hum	P13	55	300	0.5	20	C3+2	Cz+2	2S	5	1	100	1000	0.9	R90	5
Pilot w/ Hum	DH	25	300			C3+2	Cz+2	*2S	3	1	100	500	1		7
Pilot w/ Hum	DH	25	300			C3+2	Cz+2	2S	3	1	100	500	1		5.5
Pilot w/ Hum	DH	25	300			C3+2	Cz+2	2S	3	1	100	500	0.7		5
Pilot w/ Hum	DH	25	300			C3+2	Cz+2	A3R3	3	1	100	500	1	R90	7
Pilot w/ Hum	DH	25	300			C3+2	Cz+2	2S	3	1	100	500	1	R50	5
Pilot w/ Hum	DH	25	300			C3+2	Cz+2	2S	3	1	100	500	1	R90	5.5
Pilot w/ Hum	DH	25	300			C3+2	Cz+2	2S	3	1	300	500	1	R50	5
Pilot w/ Hum	DH	25	300			C3+2	Cz+2	2S	3	1	300	500	1	R90	5
Pilot w/ Hum	DH	25	300			C3+2	Cz+2	2S	2.5	1	300	0	1		5
Pilot w/ Hum	DH	25	300			C3+2	Cz+2	2S	2	1	300	0	1		5
Pilot w/ Hum	DH	25	300			C3+2	Cz+2	2S	2.5	1	300	0	1		4.9
Pilot w/ Hum	DH	25	300			C3+2	Cz+2	2S	4	0.1	5	0		C	5.8
Pilot w/ Hum	DH	25	300			C3+2	Cz+2	SON3/3	1	1	100	0		C	6
Pilot w/ Hum	DH	25	300			C3+2	Cz+2	SON3/3	2	1	100	0		C	5
Pilot w/ Hum	DH	25	300			C3+2	Cz+2	SON3/3	3	1	100	0		C	5
Pilot w/ Hum	DH	25	300			C3+2	Cz+2	SON3/3	3	1	100	500	1	R50	5
Pilot w/ Hum	DH	25	300			C3+2	Cz+2	SON3/3	3	1	100	500	1	R90	6
Pilot w/ Hum	DH	25	300			C3+2	Cz+2	SON3/3	3	1	300	0		C	5
Pilot w/ Hum	DH	25	300			C3+2	Cz+2	SON3/3	3	1	300	500	1	R90	5.5
Pilot w/ Hum	DH	25	300			C3+2	Cz+2	SON3/3	3	1	300	500	1	R50	5
Pilot w/ Hum	DH	25	300			C3+2	Cz+2	SON3/3	3	0.1	5	500		C	6
Pilot w/ Hum	DH	25	300			C3+2	Cz+2	SON3/3	3	0.1	5	500	1	R50	6
Pilot w/ Hum	DH	25	300			C3+2	Cz+2	SON3/3	3	0.1	5	500	1	R90	6
Pilot w/ Hum	P25	50	300	1	5	C3+2	Cz+2	2S	3	1	100	500	0.9	R90	5
Pilot w/ Hum	P25	50	300	1	10	C3+2	Cz+2	2S	5	1	100	500	0.9	R90	5
Pilot w/ Hum	P25	50	300	1	10	C3+2	Cz+2	2S	7	1	100	500	0.9	R90	6
Pilot w/ Hum	P25	50	300	1	10	C3+2	Cz+2	2S	3	1	100	500	0.9	R50	6
Pilot w/ Hum	P25	50	300	1	10	C3+2	Cz+2	2S	5	1	100	500	0.9	R50	5
Pilot w/ Hum	P25	50	300	1	10	C3+2	Cz+2	2S	7	1	100	500	0.9	R50	6
Pilot w/ Hum	P25	50	300	1	10	C3+2	Cz+2	2S	5	1	100	500	0.9	R90	5
Pilot w/ Hum	P25	50	300	1	10	C3+2	Cz+2	2S	5	1	100	1000	0.9	R90	5
Pilot w/ Hum	P25	50	300	1	10	C3+2	Cz+2	2S	5	1	100	500	0.9	R90	5
Pilot w/ Hum	P25	50	300	1	10	C3+2	Cz+2	2S	5	1	100	500	0.9	R90	6
Pilot w/ Hum	P25	50	300	1	10	C3+2	Cz+2	2S	5	1	100	500	0.9	R90	6
Pilot w/ Hum	P25	50	300	0.5	10	C3+2	Cz+2	2S	5	1	100	0	0.5	S0.5Hz	5
Pilot w/ Hum	P25	50	300	0.5	10	C3+2	Cz+2	2S	5	1	100	0	0	S0.5Hz	6
Pilot w/ Hum	P25	50	300	0.5	10	C3+2	Cz+2	2S	7	1	100	0	0.5	S0.5Hz	7
Pilot w/ Hum	P25	50	300	0.5	10	C3+2	Cz+2	4S	5	1	100	0	0.5	S0.5Hz	7
Pilot w/ Hum	P25	50	300	0.5	10	C3+2	Cz+2	4S	5	1	100	0	0.5	S0.5Hz	7
Pilot w/ Hum	P25	50	300	0.5	10	C3+2	Cz+2	4S	-5	1	100	0	0.5	S0.5Hz	6
Pilot w/ Hum	P25	50	300	0.5	10	C3+2	Cz+2	2S	5	1	100	500	0.9	R90	5
Pilot w/ Hum	P25	50	300	0.5	10	C3+2	Cz+2	2S	5	1	100	500	0.9	R90	5
Pilot w/ Hum	P25	50	300	0.5	10	C3+2	Cz+2	2S	5	1	100	500	0.9	R90	5
Pilot w/ Hum	P26	60	300	0.5	10	C3+2	Cz+2	A3R3	3	1	100	1000	0.9	R90	6.5
Pilot w/ Hum	P26	60	300	0.5	10	C3+2	Cz+2	A3R3	5	1	100	1000	0.9	R90	8
Pilot w/ Hum	P26	60	300	0.5	10	C3+2	Cz+2	2S	3	1	100	1000	0.9	R90	6.5
Pilot w/ Hum	P26	60	300	0.5	10	C3+2	Cz+2	2S	5	1	100	1000	0.9	R90	7.5
Pilot w/ Hum	P26	60	300	0.5	10	C3+2	Cz+2	2S	3	1	100	1000	0.9	R90	6.5
Pilot w/ Hum	P26	60	300	0.5	10	C3+2	Cz+2	2S	3	1	100	1000	0.9	R50	6.5
Pilot w/ Hum	P26	60	300	0.5	10	C3+2	Cz+2	2S	3	1	100	1000	0.5	R50	6
Pilot w/ Hum	P26	60	300	0.5	10	C3+2	Cz+2	2S	3	1	100	1000	0.5	R90	6
Pilot w/ Hum	P26	60	300	0.5	10	C3+2	Cz+2	2S	3	1	100	1000	0	R90	5
Pilot w/ Hum	P26	60	300	0.5	10	C3+2	Cz+2	2S	3	1	100	2000	0	R100	5
Pilot w/ Hum	P26	60	300	0.5	10	C3+2	Cz+2	2S	3	1	100	2000	0	S0.25Hz	4
Pilot w/ Hum	P26	60	300	0.5	10	C3+2	Cz+2	2S	4	1	100	2000	0	S0.25Hz	4
Pilot w/ Hum	P26	60	300	0.5	10	C3+2	Cz+2	2S	3	1	100	2000	0.5	S0.25Hz	3.5
Pilot w/ Hum	P26	60	300	0.5	10	C3+2	Cz+2	2S	3	1	100	1000	1	S0.5Hz	4.5
Pilot w/ Hum	P26	60	300	0.5	10	C3+2	Cz+2	2S	3	1	300	1000	1	S0.5Hz	4.5
Pilot w/ Hum	P26	60	300	0.5	10	C3+2	Cz+2	2S	3	1	300	1000	0	S0.5Hz	4
Pilot w/ Hum	P26	60	300	0.5	10	C3+2	Cz+2	2S	3	1	300	2000	0	S0.5Hz	4
Pilot w/ Hum	P26	60	300	0.5	10	C3+2	Cz+2	2S	3	1	300	2000	0.5	S0.5Hz	4.5
Pilot w/ Hum	P26	60	300	0.5	10	C3+2	Cz+2	2S	3	1	100	1000	0	S0.5Hz	4
Pilot w/ Hum	P26	60	300	0.5	10	C3+2	Cz+2	2S	3	1	100	2000	0	S0.5Hz	4
Pilot w/ Hum	P26	60	300	0.5	10	C3+2	Cz+2	2S	1	1	100	0		C	5
Pilot w/ Hum	P26	60	300	0.5	10	C3+2	Cz+2	2S	3	1	100	0		C	5
Pilot w/ Hum	P26	60	300	0.5	10	C3+2	Cz+2	2S	-3	1	100	2000	0	S0.25Hz	3
Pilot w/ Hum	P26	60	300	0.5	10	C3+2	Cz+2	2S	-3	1	100	2000	0	S0.25Hz	4
Pilot w/ Hum	P27	40	500	0.5	10	C3+2	Cz+2	2T	1.5	1	100	1000	0	R100	2
Pilot w/ Hum	P27	40	500	0.5	10	C3+2	Cz+2	2T	1.5	1	100	1000	1	R100	3
Pilot w/ Hum	P27	40	500	0.5	10	C3+2	Cz+2	2T	1.5	1	100	1000	0.5	R100	1.7
Pilot w/ Hum	P27	40	500	0.5	10	C3+2	Cz+2	2T	1.5	1	100	2000	0	R100	1.5
Pilot w/ Hum	P27	40	500	0.5	10	C3+2	Cz+2	2T	1.5	1	100	2000	0.5	R100	2
Pilot w/ Hum	P27	40	500	0.5	10	C3+2	Cz+2	2T	1.5	1	100	1000	0	S0.5Hz	4
Pilot w/ Hum	P27	40	500	0.5	10	C3+2	Cz+2	2T	1.5	1	100	1000	0.5	S0.5Hz	4
Pilot w/ Hum	P27	40	500	0.5	10	C3+2	Cz+2	2T	1.5	1	100	1000	1	S0.5Hz	5
Pilot w/ Hum	P27	40	500	0.5	10	C3+2	Cz+2	2T	1.5	1	100	2000	0.5	S0.5Hz	3.9
Pilot w/ Hum	P27	40	500	0.5	10	C3+2	Cz+2	2T	1.5	1	100	2000	0	S0.25Hz	3.9
Pilot w/ Hum	P27	40	500	0.5	10	C3+2	Cz+2	A3R3	3	1	100	1000	0	R100	5.2
Pilot w/ Hum	P27	40	500	0.5	10	C3+2	Cz+2	A3R3	3	1	100	1000	0.5	R100	5
Pilot w/ Hum	P27	40	500	0.5	10	C3+2	Cz+2	A3R3	3	1	100	1000	1	R100	5.6
Pilot w/ Hum	P27	40	500	0.5	10	C3+2	Cz+2	A3R3	3	1	100	2000	0	R100	5.5
Pilot w/ Hum	P27	40	500	0.5	10	C3+2	Cz+2	A3R3	3	1	100	2000	0.5	R100	5.2
Pilot w/ Hum	P27	40	500	0.5	10	C3+2	Cz+2	A3R3	3	1	100	1000	0	S0.5Hz	5.7
Pilot w/ Hum	P27	40	500	0.5	10	C3+2	Cz+2	A3R3	3	1	100	1000	0.5	S0.5Hz	5.6
Pilot w/ Hum	P27	40	500	0.5	10	C3+2	Cz+2	A3R3	3	1	100	1000	1	S0.5Hz	5.7
Pilot w/ Hum	P27	40	500	0.5	10	C3+2	Cz+2	A3R3	3	1	100	2000	0.5	S0.25Hz	5.6
Pilot w/ Hum	P27	40	500	0.5	10	C3+2	Cz+2	A3R3	3	1	100	2000	0	S0.25Hz	5.6
Pilot w/ Hum	P27	40	500	0.5	10	C3+2	Cz+2	2S	3	1	100	1000	0	R100	5.7
Pilot w/ Hum	P27	40	500	0.5	10	C3+2	Cz+2	2S	3	1	100	1000	0.5	R100	5.5
Pilot w/ Hum	P27	40	500	0.5	10	C3+2	Cz+2	2S	3	1	100	1000	1	R100	5.5
Pilot w/ Hum	P27	40	500	0.5	10	C3+2	Cz+2	2S	3	1	100	2000	0	R100	6.2
Pilot w/ Hum	P27	35	500	0.5	10	C3+2	Cz+2	2S	3	1	100	2000	0.5	R100	5.2
Pilot w/ Hum	P27	35	500	0.5	10	C3+2	Cz+2	2S	3	1	100	1000	0	S0.5Hz	4.8
Pilot w/ Hum	P27	35	500	0.5	10	C3+2	Cz+2	2S	3	1	100	1000	0.5	S0.5Hz	4.9
Pilot w/ Hum	P27	35	500	0.5	10	C3+2	Cz+2	2S	3	1	100	1000	1	S0.5Hz	4.9
Pilot w/ Hum	P27	35	500	0.5	10	C3+2	Cz+2	2S	3	1	100	2000	0.5	S0.25Hz	4.7
Pilot w/ Hum	P27	35	500	0.5	10	C3+2	Cz+2	2S	3	1	100	2000	0	S0.25Hz	4.5
Pilot wo/ Hum	NG	140	100	1	30										7
Pilot wo/ Hum	NG	140	100	1	30										7
Pilot wo/ Hum	NG	140	100	0.5	30										7
Pilot wo/ Hum	NG	140	100	0.5	30										7
Pilot wo/ Hum	NG	140	100	0.5	30										7
Pilot wo/ Hum	NG	140	100	0.5	30										7
Pilot wo/ Hum	NG	140	100	0.5	30										7
Pilot wo/ Hum	NG	140	100	0.5	30										7
Pilot wo/ Hum	QH	35	300	0.5	10										4
Pilot wo/ Hum	QH	35	300	0.5	10										4
Pilot wo/ Hum	QH	35	300	0.5	10										4
Pilot wo/ Hum	QH	40	300	0.5	10										4
Pilot wo/ Hum	QH	40	300	0.5	10										4
Pilot wo/ Hum	QH	40	300	0.5	15										4
Pilot wo/ Hum	QH	35	300	0.5	15										4
Pilot wo/ Hum	QH	45	300	0.5	15										4
Pilot wo/ Hum	NN	55	300	0.5	20										5
Pilot wo/ Hum	NN	55	300	0.5	20										5
Pilot wo/ Hum	NN	55	300	0.5	20										5
Pilot wo/ Hum	NN	55	300	0.5	20										5
Pilot wo/ Hum	NN	55	300	0.5	20										5
Pilot wo/ Hum	QH	40	300	1											5.5
Pilot wo/ Hum	P9	60	300	0.5	15										6.5
Pilot wo/ Hum	P9	60	300	0.5	15										6.5
Pilot wo/ Hum	P9	60	300	0.5	15										6.5
Pilot wo/ Hum	P9	60	300	0.5	15										6.5
Pilot wo/ Hum	P9	60	300	0.5	15										6.5
Pilot wo/ Hum	P9	60	300	0.5	15										6.5
Pilot wo/ Hum	P9	60	300	0.5	15										6.5
Pilot wo/ Hum	P9	60	300	0.5	15										6.5
Pilot wo/ Hum	P9	60	300	0.5	15										6.5
Pilot wo/ Hum	P11	45	300	0.5	15										3.5
Pilot wo/ Hum	P11	45	300	0.5	15										3.5
Pilot wo/ Hum	P11	45	300	0.5	15										3.5
Pilot wo/ Hum	P11	45	300	0.5	15										3.5
Pilot wo/ Hum	P11	45	300	0.5	15										3.5
Pilot wo/ Hum	P11	45	300	0.5	15										3.5
Pilot wo/ Hum	P11	45	300	0.5	15										3.5
Pilot wo/ Hum	P9	65	300	0.5	15										7
Pilot wo/ Hum	P9	65	300	0.5	15										7
Pilot wo/ Hum	P9	70	300	0.5	15										7
Pilot wo/ Hum	P9	70	300	0.5	15										7
Pilot wo/ Hum	P9	70	300	0.5	15										7
Pilot wo/ Hum	QH	70	300	0.5	10										5.5
Pilot wo/ Hum	QH	70	300	0.5	10										5.5
Pilot wo/ Hum	QH	70	300	0.5	10										5.5
Pilot wo/ Hum	P14	30	300	0.5	10										5
Pilot wo/ Hum	P14	30	300	0.5	10										5
Pilot wo/ Hum	P14	30	300	0.5	10										5
Pilot wo/ Hum	P15	67	200	0.5	10										7.5
Pilot wo/ Hum	P15	67	200	0.5	10										7.5
Pilot wo/ Hum	P15	67	200	0.5	10										7.5
Pilot wo/ Hum	P15	67	200	0.5	10										7.5
Pilot wo/ Hum	P15	67	200	0.5	10										7.5
Pilot wo/ Hum	P15	67	200	0.5	10										7.5
Pilot wo/ Hum	P15	67	200	0.5	10										7.5
Pilot wo/ Hum	P15	67	200	1	20										6.5
Pilot wo/ Hum	P15	67	200	1	20										6
Pilot wo/ Hum	P20	13	300												4.5
Pilot wo/ Hum	P9	60	300	1	20										7
Pilot wo/ Hum	P9	60	300	1	20										7
Pilot wo/ Hum	P9	60	300	1	20										7
Pilot wo/ Hum	P20	13	300												4.5
Pilot wo/ Hum	P9	60	300	1	20										7
Pilot wo/ Hum	P9	60	300	1	20										7
Pilot wo/ Hum	P9	60	300	1	20										7
Pilot wo/ Hum	P20	13	300												4.5
Pilot wo/ Hum	P20	13	300												4.5
Pilot wo/ Hum	P20	13	300												4.5
Pilot wo/ Hum	P20	13	300												4.5
Pilot wo/ Hum	P20	13	300												4.5
Pilot wo/ Hum	P20	13	300												4.5
Pilot wo/ Hum	P20	13	300												4.5
Pilot wo/ Hum	P20	13	300												4.5
Pilot wo/ Hum	P20	13	300												4.5
Pilot wo/ Hum	P20	13	300												4.5
Pilot wo/ Hum	P20	13	300												4.5
Pilot wo/ Hum	P20	13	300												4.5
Pilot wo/ Hum	P20	13	300												4.5
Pilot wo/ Hum	P20	13	300												4.5
Pilot wo/ Hum	P20	13	300												4.5
Pilot wo/ Hum	P20	13	300												4.5
Pilot wo/ Hum	P20	13	300												4.5
Pilot wo/ Hum	P20	13	300												4.5
Pilot wo/ Hum	P20	13	300												4.5
Pilot wo/ Hum	P20	13	300												4.5
Pilot wo/ Hum	P20	13	300												4.5
Pilot wo/ Hum	P20	13	300												4.5
Pilot wo/ Hum	P20	13	300												4.5
Pilot wo/ Hum	P20	13	300												4.5
Pilot wo/ Hum	P20	13	300												4.5
Pilot wo/ Hum	P20	13	300												4.5
Pilot wo/ Hum	P20	13	300												4.5
Pilot wo/ Hum	P20	13	300												4.5
Pilot wo/ Hum	P20	13	300												4.5
Pilot wo/ Hum	P20	13	300												3.5
Pilot wo/ Hum	P20	13	300												3.5
Pilot wo/ Hum	P20	13	300												3.5
Pilot wo/ Hum	P20	13	300												3.5
Pilot wo/ Hum	P20	13	300												3.5
Pilot wo/ Hum	P20	13	300												3.5
Pilot wo/ Hum	P20	13	300												3.5
Pilot wo/ Hum	P20	13	300												3.5
Pilot wo/ Hum	P20	13	300												3.5
Pilot wo/ Hum	P20	13	300												3.5
Pilot wo/ Hum	P20	13	300												3.5
Pilot wo/ Hum	P20	13	300												3.5
Pilot wo/ Hum	P20	13	300												3.5
Pilot wo/ Hum	P20	13	300												3.5
Pilot wo/ Hum	P20	13	300												3.5
Pilot wo/ Hum	P20	13	300												3.5
Pilot wo/ Hum	P20	13	300												3.5
Pilot wo/ Hum	P20	13	300												3.5
Pilot wo/ Hum	P20	13	300												3.5
Pilot wo/ Hum	P20	13	300												3.5
Pilot wo/ Hum	P20	13	300												3.5
Pilot wo/ Hum	P20	13	300												3.5
Pilot wo/ Hum	P20	13	300												3.5
Pilot wo/ Hum	P20	13	300												3.5
Pilot wo/ Hum	P20	13	300												3.5
Pilot wo/ Hum	P20	13	300												3.5
Pilot wo/ Hum	P20	13	300												3.5
Pilot wo/ Hum	P20	13	300												3.5
Pilot wo/ Hum	P20	13	300												3.5
Pilot wo/ Hum	P20	13	300												3.5
Pilot wo/ Hum	P20	13	300												3.5
Pilot wo/ Hum	P20	13	300												3.5
Pilot wo/ Hum	P20	13	300												3.5
Pilot wo/ Hum	P20	13	300												3.5
Pilot wo/ Hum	P20	13	300												3.5
Pilot wo/ Hum	P20	13	300												3.5
Pilot wo/ Hum	P20	13	300												3.5
Pilot wo/ Hum	P20	13	300												3.5
Pilot wo/ Hum	P20	13	300												3.5
Pilot wo/ Hum	P20	13	300												3.5
Pilot wo/ Hum	P9	60	300	1	20										7
Pilot wo/ Hum	P9	60	300	1	20										7
Pilot wo/ Hum	P9	60	300	1	20										7
Pilot wo/ Hum	P9	60	300	1	20										7
Pilot wo/ Hum	DH	25	300												6
Pilot wo/ Hum	DH	25	300												6
Pilot wo/ Hum	DH	25	300												6
Pilot wo/ Hum	DH	25	300												6
Pilot wo/ Hum	DH	25	300												6
Pilot wo/ Hum	DH	25	300												6
Pilot wo/ Hum	DH	25	300												6
Pilot wo/ Hum	DH	25	300												6
Pilot wo/ Hum	DH	25	300												6
Pilot wo/ Hum	DH	25	300												6
Pilot wo/ Hum	DH	25	300												6
Pilot wo/ Hum	DH	25	300												6
Pilot wo/ Hum	DH	25	300												6
Pilot wo/ Hum	DH	25	300												6
Pilot wo/ Hum	DH	25	300												6
Pilot wo/ Hum	DH	25	300												6
Pilot wo/ Hum	DH	25	300												6
Pilot wo/ Hum	DH	25	300												6
Pilot wo/ Hum	DH	25	300												6
Pilot wo/ Hum	DH	25	300												6
Pilot wo/ Hum	DH	25	300												6
Pilot wo/ Hum	DH	25	300												6
Pilot wo/ Hum	DH	25	300												6
Pilot wo/ Hum	P25	50	300	1	5										6
Pilot wo/ Hum	P25	50	300	1	10										6
Pilot wo/ Hum	P25	50	300	1	10										7
Pilot wo/ Hum	P25	50	300	1	10										7
Pilot wo/ Hum	P25	50	300	1	10										7
Pilot wo/ Hum	P25	50	300	1	10										7
Pilot wo/ Hum	P25	50	300	1	10										7
Pilot wo/ Hum	P25	50	300	1	10										7
Pilot wo/ Hum	P25	50	300	1	10										7
Pilot wo/ Hum	P25	50	300	1	10										7
Pilot wo/ Hum	P25	50	300	1	10										7
Pilot wo/ Hum	P25	50	300	0.5	10										7
Pilot wo/ Hum	P25	50	300	0.5	10										7
Pilot wo/ Hum	P25	50	300	0.5	10										7
Pilot wo/ Hum	P25	50	300	0.5	10										7
Pilot wo/ Hum	P25	50	300	0.5	10										7
Pilot wo/ Hum	P25	50	300	0.5	10										7
Pilot wo/ Hum	P25	50	300	0.5	10										7
Pilot wo/ Hum	P25	50	300	0.5	10										7
Pilot wo/ Hum	P25	50	300	0.5	10										6
Pilot wo/ Hum	P26	60	300	0.5	10										7
Pilot wo/ Hum	P26	60	300	0.5	10										7
Pilot wo/ Hum	P26	60	300	0.5	10										7
Pilot wo/ Hum	P26	60	300	0.5	10										7
Pilot wo/ Hum	P26	60	300	0.5	10										6
Pilot wo/ Hum	P26	60	300	0.5	10										6.5
Pilot wo/ Hum	P26	60	300	0.5	10										6.5
Pilot wo/ Hum	P26	60	300	0.5	10										6
Pilot wo/ Hum	P26	60	300	0.5	10										6
Pilot wo/ Hum	P26	60	300	0.5	10										6
Pilot wo/ Hum	P26	60	300	0.5	10										5.5
Pilot wo/ Hum	P26	60	300	0.5	10										5.5
Pilot wo/ Hum	P26	60	300	0.5	10										3.5
Pilot wo/ Hum	P26	60	300	0.5	10										5
Pilot wo/ Hum	P26	60	300	0.5	10										5
Pilot wo/ Hum	P26	60	300	0.5	10										5
Pilot wo/ Hum	P26	60	300	0.5	10										5
Pilot wo/ Hum	P26	60	300	0.5	10										5
Pilot wo/ Hum	P26	60	300	0.5	10										5
Pilot wo/ Hum	P26	60	300	0.5	10										5
Pilot wo/ Hum	P26	60	300	0.5	10										5
Pilot wo/ Hum	P26	60	300	0.5	10										5
Pilot wo/ Hum	P26	60	300	0.5	10										4.5
Pilot wo/ Hum	P26	60	300	0.5	10										4
Pilot wo/ Hum	P27	40	500	0.5	10										3
Pilot wo/ Hum	P27	40	500	0.5	10										3
Pilot wo/ Hum	P27	40	500	0.5	10										3
Pilot wo/ Hum	P27	40	500	0.5	10										3
Pilot wo/ Hum	P27	40	500	0.5	10										4
Pilot wo/ Hum	P27	40	500	0.5	10										4
Pilot wo/ Hum	P27	40	500	0.5	10										5
Pilot wo/ Hum	P27	40	500	0.5	10										5
Pilot wo/ Hum	P27	40	500	0.5	10										5
Pilot wo/ Hum	P27	40	500	0.5	10										5
Pilot wo/ Hum	P27	40	500	0.5	10										5.7
Pilot wo/ Hum	P27	40	500	0.5	10										5.7
Pilot wo/ Hum	P27	40	500	0.5	10										5.7
Pilot wo/ Hum	P27	40	500	0.5	10										6
Pilot wo/ Hum	P27	40	500	0.5	10										5.77
Pilot wo/ Hum	P27	40	500	0.5	10										5.7
Pilot wo/ Hum	P27	40	500	0.5	10										5.7
Pilot wo/ Hum	P27	40	500	0.5	10										5.7
Pilot wo/ Hum	P27	40	500	0.5	10										6
Pilot wo/ Hum	P27	40	500	0.5	10										5.7
Pilot wo/ Hum	P27	40	500	0.5	10										6.2
Pilot wo/ Hum	P27	40	500	0.5	10										6.2
Pilot wo/ Hum	P27	40	500	0.5	10										6.2
Pilot wo/ Hum	P27	40	500	0.5	10										6.5
Pilot wo/ Hum	P27	35	500	0.5	10										5.5
Pilot wo/ Hum	P27	35	500	0.5	10										5.5
Pilot wo/ Hum	P27	35	500	0.5	10										5.5
Pilot wo/ Hum	P27	35	500	0.5	10										5.5
Pilot wo/ Hum	P27	35	500	0.5	10										5.7
Pilot wo/ Hum	P27	35	500	0.5	10										4.7
Fibromyalgia	F1	5	500	1	5	C3+2	Cz+2								1
Fibromyalgia	F1	7	500	1	5	C3+2	Cz+2								2
Fibromyalgia	F1	10	500	1	5	C3+2	Cz+2								4
Fibromyalgia	F1	10	500	1	5	C3(+2,+2)	Cz(+2,+2)								4
Fibromyalgia	F1	10	500	1	5	C3+4	Cz+4								5
Fibromyalgia	F1	10	500	1	5	C3(+2,-2)	Cz(+2,-2)								4.5
Fibromyalgia	F1	10	500	1	5	C3	Cz								5
Fibromyalgia	F1	13	500	1	5	C3+2	Cz+2								6
Fibromyalgia	F1	13	300	1	5	C3+2	Cz+2								6
Fibromyalgia	F1	13	200	1	5	C3+2	Cz+2								4
Fibromyalgia	F1	15	200	1	5	C3+2	Cz+2								5
Fibromyalgia	F1	18	200	1	5	C3+2	Cz+2								6
Fibromyalgia	F1	13	500	0.5	5	C3+2	Cz+2								6
Fibromyalgia	F1	13	300	0.5	5	C3+2	Cz+2								4
Fibromyalgia	F1	16	300	0.5	5	C3+2	Cz+2								5.5
Fibromyalgia	F1	18	300	0.5	5	C3+2	Cz+2								6
Fibromyalgia	F1	18	200	0.5	5	C3+2	Cz+2								4
Fibromyalgia	F1	21	200	0.5	5	C3+2	Cz+2								3
Fibromyalgia	F1	24	200	0.5	5	C3+2	Cz+2								6
Fibromyalgia	F1	13	500	0.33	5	C3+2	Cz+2								6
Fibromyalgia	F1	18	300	0.33	5	C3+2	Cz+2								7
Fibromyalgia	F1	21	200	0.33	5	C3+2	Cz+2								2
Fibromyalgia	F1	24	200	0.33	5	C3+2	Cz+2								4
Fibromyalgia	F1	27	200	0.33	5	C3+2	Cz+2								6
Fibromyalgia	F1	24	200	1	5	C3+2	Cz+2	AC3,RC3+4 ACz+4,RCz					0.5	R0	6
Fibromyalgia	F1	24	200	0.33	5	C3+2	Cz+2	AC3,RC3+4 ACz+4,RCz					0.5	R0	5
Fibromyalgia	F1	24	200	0.33	5	C3+2	Cz+2	AC3,RC3+4 ACz+4,RCz					0.5	R100	4
Fibromyalgia	F1	27	200	0.33	5	C3+2	Cz+2	AC3,RC3+4 ACz+4,RCz					0.5	R100	3.5
Fibromyalgia	F1	30	200	0.33	5	C3+2	Cz+2	AC3,RC3+4 ACz+4,RCz					0.5	R100	5
Fibromyalgia	F1	27	200	0.33	5	C3+2	Cz+2	AC3,RC3+4 ACz+4,RCz					0.5	R100	2
Fibromyalgia	F1	30	200	0.33	5	C3+2	Cz+2	AC3,RC3+4 ACz+4,RCz					0.5	R100	3
Fibromyalgia	F1	33	200	0.33	5	C3+2	Cz+2	AC3,RC3+4 ACz+4,RCz					0.5	R100	3
Fibromyalgia	F1	36	200	0.33	5	C3+2	Cz+2	AC3,RC3+4 ACz+4,RCz					0.5	R100	3.8
Fibromyalgia	F1	39	200	0.33	5	C3+2	Cz+2	AC3,RC3+4 ACz+4,RCz					0.5	R100	4
Fibromyalgia	F1	42	200	0.33	5	C3+2	Cz+2	AC3,RC3+4 ACz+4,RCz					0.5	R100	5
Fibromyalgia	F1	42	200	0.33	15	C3+2	Cz+2	AC3,RC3+4 ACz+4,RCz					0.5	R100	1
Fibromyalgia	F1	45	200	0.33	15	C3+2	Cz+2	AC3,RC3+4 ACz+4,RCz					0.5	R100	6
Fibromyalgia	F1	45	200	0.33	15	C3+2	Cz+2	AC3,RC3+4 ACz+4,RCz					0.5	R100	4
Fibromyalgia	F1	5	200	0.33	5	C3+2	Cz+2								0
Fibromyalgia	F1	10	200	0.33	5	C3+2	Cz+2								0
Fibromyalgia	F1	15	200	0.33	5	C3+2	Cz+2								0.8
Fibromyalgia	F1	20	200	0.33	5	C3+2	Cz+2								1.5
Fibromyalgia	F1	25	200	0.33	5	C3+2	Cz+2								2
Fibromyalgia	F1	30	200	0.33	5	C3+2	Cz+2								4
Fibromyalgia	F1	35	200	0.33	5	C3+2	Cz+2	AC3,RC3+4 ACz+4,RCz					0.5	R100	6
Fibromyalgia	F1	35	200	0.33	5	C3+2	Cz+2	AC3,RC3+4 ACz+4,RCz	1000	100		1000	0.5	R100	5
Fibromyalgia	F1	35	200	0.33	5	C3+2	Cz+2	AC3,RC3+4 ACz+4,RCz	500	100		1000	0.5	R100	5
Fibromyalgia	F1	35	200	0.33	5	C3+2	Cz+2	AC3,RC3+4 ACz+4,RCz	500	100		1000	0.5	R100	5
Fibromyalgia	F1	35	200	0.33	5	C3+2	Cz+2	AC3,RC3+4 ACz+4,RCz	500	100		1000	0.9	R100	4
Fibromyalgia	F1	40	200	0.33	5	C3+2	Cz+2	AC3,RC3+4 ACz+4,RCz	500	100		1000	0.9	R100	5
Fibromyalgia	F1	40	200	0.33	5	C3+2	Cz+2	AC3,RC3+4 ACz+4,RCz	500	100		1000	0.9	R100	4
Fibromyalgia	F1	40	200	0.33	15	C3+2	Cz+2	AC3,RC3+4 ACz+4,RCz	500	100		1000	0.9	R100	4
Fibromyalgia	F1	40	200	0.5	5	C3+2	Cz+2	AC3,RC3+4 ACz+4,RCz	500	100		1000	1	R100	5
Fibromyalgia	F1	40	200	0.5	5	C3+2	Cz+2	AC3,RC3+4 ACz+4,RCz	500	100		1000	0.5	S1Hz	5
Fibromyalgia	F1	40	200	0.5	5	C3+2	Cz+2	AC3,RC3+4 ACz+4,RCz	500	100		1000	0.5	S1Hz	5
Fibromyalgia	F1	40	200	0.5	5	C3+2	Cz+2	AC3,RC3+4 ACz+4,RCz					0.9	R100	4
Fibromyalgia	F1	40	200	0.5	5	C3+2	Cz+2	AC3,RC3+4 ACz+4,RCz					0.9	R100	5
Fibromyalgia	F1	40	200	0.5	5	C3+2	Cz+2	AC3,RC3+4 ACz+4,RCz					0.9	R100	6
Fibromyalgia	F1	40	200	0.5	5	C3+2	Cz+2	AC3,RC3+4 ACz+4,RCz					0.9	R100	6
Fibromyalgia	F1	40	200	0.5	5	C3+2	Cz+2	AC3,RC3+4 ACz+4,RCz					0.9	R100	5
Fibromyalgia	F1	40	200	0.5	5	C3+2	Cz+2	AC3,RC3+4 ACz+4,RCz					0.9	R100	4
Fibromyalgia	F1	40	200	1	5	C3+2	Cz+2	AC3,RC3+4 ACz+4,RCz					0.9	R100	4
Fibromyalgia	F1	40	200	1	5	C3+2	Cz+2	AC3,RC3+4 ACz+4,RCz					0.9	R100	4
Fibromyalgia	F1	40	200	1	5	C3+2	Cz+2	AC3,RC3+4 ACz+4,RCz					0.9	R100	5
Fibromyalgia	F1	40	200	1	5	C3+2	Cz+2	AC3,RC3+4 ACz+4,RCz					0.9	R100	6
Fibromyalgia	F1	40	200	1	5	C3+2	Cz+2	AC3,RC3+4 ACz+4,RCz	500	100		1000	0.9	R100	6
Fibromyalgia	F1	40	200	1	5	C3+2	Cz+2	AC3,RC3+4 ACz+4,RCz	500	100		1000	0.9	R100	5
Fibromyalgia	F1	40	200	1	5	C3+2	Cz+2	AC3,RC3+4 ACz+4,RCz	500	100		1000		PS2Hz	4
Fibromyalgia	F1	40	200	1	5	C3+2	Cz+2	AC3,RC3+4 ACz+4,RCz	500	100		1000		PS1Hz	4
Fibromyalgia	F1	40	200	1	5	C3+2	Cz+2	AC3,RC3+4 ACz+4,RCz	500	100		1000		PS4Hz	4
Fibromyalgia	F1	40	200	1	5	C3+2	Cz+2	AC3,RC3+4 ACz+4,RCz	500	100		1000		PS2Hz	4
Fibromyalgia	F1	40	200	1	5	C3+2	Cz+2	AC3,RC3+4 ACz, RCz+4	500	100		1000		PS2Hz	3
Fibromyalgia	F1	5	200	1	5	C3+2	Cz+2		500	100		500			0
Fibromyalgia	F1	15	200	1	5	C3+2	Cz+2		500	100		500			0.5
Fibromyalgia	F1	20	200	1	5	C3+2	Cz+2		500	100		500			1
Fibromyalgia	F1	25	200	1	5	C3+2	Cz+2		500	100		500			2
Fibromyalgia	F1	30	200	1	5	C3+2	Cz+2		750	100		500			3
Fibromyalgia	F1	35	200	1	5	C3+2	Cz+2		750	250		500			5
Fibromyalgia	F1	35	200	1	5	C3+2	Cz+2	AC3,RC3+4 ACz+4,RCz	100	1000		500	0.9	R100	2
Fibromyalgia	F1	35	200	1	5	C3+2	Cz+2	AC3,RC3+4 ACz+4,RCz	100	1000		500	0.9	R100	3
Fibromyalgia	F1	40	200	1	15	C3+2	Cz+2	AC3,RC3+4 ACz+4,RCz	100	1000		500	0.9	R100	5
Fibromyalgia	F1	40	200	1	5	C3+2	Cz+2	AC3,RC3+4 ACz+4,RCz	100	1000		500	0.9	R100	4
Fibromyalgia	F1	45	200	1	5	C3+2	Cz+2	AC3,RC3+4 ACz+4,RCz	100	1000		500	0.9	R100	4
Fibromyalgia	F1	45	200	1	15	C3+2	Cz+2	AC3,RC3+4 ACz+4,RCz	100	1000		500	0.9	R100	5
Fibromyalgia	F1	45	200	1	15	C3+2	Cz+2	AC3,RC3+4 ACz+4,RCz					0.9	R100	4
Fibromyalgia	F1	5	200	1	5	Cz	8el;30%	ACz-2;RCz+2							0
Fibromyalgia	F1	10	200	1	5	Cz	8el;30%	ACz-2;RCz+2							0
Fibromyalgia	F1	15	200	1	5	Cz	8el;30%	ACz-2;RCz+2							1
Fibromyalgia	F1	20	200	1	5	Cz	8el;30%	ACz-2;RCz+2							1
Fibromyalgia	F1	25	200	1	5	Cz	8el;30%	ACz-2;RCz+2							2
Fibromyalgia	F1	30	200	1	5	Cz	8el;30%	ACz-2;RCz+2							2.5
Fibromyalgia	F1	35	200	1	5	Cz	8el;30%	ACz-2;RCz+2							3
Fibromyalgia	F1	40	200	1	5	Cz	8el;30%	ACz-2;RCz+2							4.5
Fibromyalgia	F1	40	200	1	5	Cz	8el;30%	ACz-2;RCz+2					0.9	R100	3
Fibromyalgia	F1	45	200	1	5	Cz	8el;30%	ACz-2;RCz+2	100	1000		500	0.9	R100	4
Fibromyalgia	F1	45	200	1	5	Cz	8el;30%	ACz-2;RCz+2	100	1000		500	0.9	R100	5
Fibromyalgia	F1	45	200	1	5	Cz	8el;30%	ACz-2;RCz+2	100	1000		500	0.9	R100	4
Fibromyalgia	F1	45	200	1	5	Cz	8el;30%	ACz-2;RCz+2	750	100		500	0.9	R100	3
Fibromyalgia	F1	50	200	1	5	Cz	8el;30%	ACz-2;RCz+2	750	100		500	0.9	R100	4
Fibromyalgia	F1	50	200	1	15	Cz	8el;30%	ACz-2;RCz+2	750	100		500	0.9	R100	5
Fibromyalgia	F1	50	200	1	5	Cz	8el;30%	ACz-2;RCz+2	750	100		500	0.9	R100	4.5
Fibromyalgia	F1	50	200	1	5	Cz	8el;30%	ACz-2;RCz+2	750	100		500	0.9	R100	4.5
Fibromyalgia	F1	50	200	1	5	Cz	8el;30%	ACz-2;RCz+2	750	100		500	0.9	R100	5
Fibromyalgia	F1	50	200	1	5	Cz	8el;30%	ACz-2;RCz+2	750	100		500	0.9	R100	4
Fibromyalgia	F1	50	200	1	5	Cz	8el;30%	ACz-2;RCz+2	750	100		500	0.9	R100	5
Fibromyalgia	F1	55	200	1	5	Cz	8el;30%	ACz-2;RCz+2	750	100		500	0.9	R100	3.5
Fibromyalgia	F1	55	200	1	5	Cz	8el;30%	ACz+2;RCz-2	750	100		500	0.9	R100	4
Fibromyalgia	F1	60	200	1	5	Cz	8el;30%	ACz+2;RCz-2	750	100		500	0.9	R100	5.5
Fibromyalgia	F1	60	200	1	5	Cz	8el;30%	ACz+2;RCz-2	750	100		500	0.9	R100	3
Fibromyalgia	F1	60	200	1	15	Cz	8el;30%	ACz+2;RCz-2	750	100		500	0.9	R100	6
Fibromyalgia	F1	60	200	1	5	Cz	8el;30%	ACz+2;RCz-2					0.9	R100	4
Fibromyalgia	F1	65	200	1	5	Cz	8el;30%	ACz+2;RCz-2	750	100		500	0.9	R100	3.5
Fibromyalgia	F1	70	200	1	5	Cz	8el;30%	ACz+2;RCz-2					0.9	R100	3.5
Fibromyalgia	F1	70	200	1	15	Cz	8el;30%	ACz+2;RCz-2					0.9	R100	6
Fibromyalgia	F1	70	200	1	5	Cz	8el;30%	ACz+2;RCz-2					0.9	R100	5
Fibromyalgia	F1	70	200	1	5	Cz	8el;30%	ACz+2;RCz-2					0.9	R100	5
Fibromyalgia	F1	75	200	1	5	Cz	8el;30%	ACz+2;RCz-2					0.9	R100	5
Fibromyalgia	F1	75	200	0.33	5	Cz	8el;30%	ACz+2;RCz-2					0.9	R100	3.5
Fibromyalgia	F1	80	200	0.33	5	Cz	8el;30%	ACz+2;RCz-2					0.9	R100	3
Fibromyalgia	F1	80	200	0.33	15	Cz	8el;30%	ACz+2;RCz-2					0.9	R100	2.5
Fibromyalgia	F1	80	200	0.5	15	Cz	8el;30%	ACz+2;RCz-2					0.9	R100	4.5
Fibromyalgia	F1	85	200	0.33	5	Cz	8el;30%	ACz+2;RCz-2	750	100		500	0.9	R100	5
Fibromyalgia	F1	80	200	0.33	5	Cz	8el;30%	ACz+2;RCz-2	750	100		500	0.9	R100	4
Fibromyalgia	F1	80	200	0.33	5	Cz+(0,1)	8el;30%	ACz+2;RCz-2	750	100		200	0.9	R100	4.5
Fibromyalgia	F1	80	200	0.33	5	Cz+(0,1)	8el;30%	ACz+(2,1);RCz+(-2,1)	500	100		500	0.9	R100	4
Fibromyalgia	F1	75	200	0.33	5	Cz+(0,1)	8el;30%	ACz+(2,1);RCz+(-2,1)	500	100		500	0.9	R100	3
Fibromyalgia	F1	75	200	0.33	15	Cz+(0,1)	8el;30%	ACz+(2,1);RCz+(-2,1)	500	100		500	0.9	R100	2
Fibromyalgia	F1	80	200	0.33	15	Cz+(0,1)	8el;30%	ACz+(2,1);RCz+(-2,1)	500	100		500	0.9	R100	5
Fibromyalgia	F1	75	200	0.33	5	Cz+(0,-1)	8el;30%	ACz+(2,-1);RCz+(-2,-1)	100	1000		500	0.9	R100	5
Fibromyalgia	F1	70	200	0.33	5	Cz+(0,-1)	8el;30%	ACz+(2,-1);RCz+(-2,-1)	100	1000		500	0.9	R100	2
Fibromyalgia	F1	70	200	0.33	15	Cz+(0,-1)	8el;30%	ACz+(2,-1);RCz+(-2,-1)	600	100		500	0.9	R100	3
Fibromyalgia	F1	75	200	0.33	15	Cz+(0,-1)	8el;30%	ACz+(2,-1);RCz+(-2,-1)	300	100		500	0.9	R100	3.5
Fibromyalgia	F1	75	200	0.33	15	Cz+(0,-1)	8el;30%	ACz+(2,-1);RCz+(-2,-1)	300	100		500	1	R100	4
Fibromyalgia	F1	3	200	3	9	C3+2	Cz+2		300	100		500			0
Fibromyalgia	F1	8	200	3	9	C3+2	Cz+2		300	100		500			0
Fibromyalgia	F1	13	200	3	9	C3+2	Cz+2		300	100		500			0.5
Fibromyalgia	F1	18	200	3	9	C3+2	Cz+2		300	100		500			1
Fibromyalgia	F1	23	200	3	9	C3+2	Cz+2		300	100		500			1
Fibromyalgia	F1	28	200	3	9	C3+2	Cz+2		300	100		500			2
Fibromyalgia	F1	33	200	3	9	C3+2	Cz+2		300	100		500			3
Fibromyalgia	F1	38	200	3	9	C3+2	Cz+2	AC3,RC3+4 ACz+4,RCz	300	100		500	1	R100	5
Fibromyalgia	F1	38	200	3	9	C3+2	Cz+2	AC3,RC3+4 ACz+4,RCz	300	100		500	1	R100	4.5
Fibromyalgia	F1	38	200	3	9	C3+2	Cz+2	AC3,RC3+4 ACz+4,RCz	300	100		500	1	R100	4
Fibromyalgia	F1	38	200	3	9	C3+2	Cz+2	AC3,RC3+4 ACz+4,RCz	300	100		500	1	R100	3.5
Fibromyalgia	F1	43	200	3	9	C3+2	Cz+2	AC3,RC3+4 ACz+4,RCz	300	100		500	1	R100	4
Fibromyalgia	F1	43	200	3	15	C3+2	Cz+2	AC3,RC3+4 ACz+4,RCz	300	100		500	1	R100	5.8
Fibromyalgia	F1	43	200	3	15	C3+2	Cz+2	AC3,RC3+4 ACz+4,RCz	300	100		500	1	R100	6
Fibromyalgia	F1	43	200	3	15	C3+2	Cz+2	AC3,RC3+4 ACz+4,RCz	300	100		500	1	R50	5.5
Fibromyalgia	F1	38	200	3	9	C3+2	Cz+2	AC3,RC3+4 ACz+4,RCz	300	100		500	1	R100	4.5
Fibromyalgia	F1	38	200	3	9	C3+2	Cz+2	AC3,RC3+4 ACz+4,RCz	300	100		500	1	R100	4
Fibromyalgia	F1	38	200	3	9	C3+2	Cz+2	AC3-1,RC3+5 ACz+4,RCz	300	100		500	1	R100	3.5
Fibromyalgia	F1	38	200	3	9	C3+2	Cz+2	AC3-1,RC3+5 ACz+4,RCz	300	100		500	1	R100	4.5
Fibromyalgia	F1	35	200	3	9	C3+2	Cz+2	AC3-1,RC3+5 ACz+4,RCz	300	100		500	1	R100	4
Fibromyalgia	F1	28	200	3	90	C3+2	Cz+2	AC3-1,RC3+5 ACz+4,RCz	300	100		500	0.9	R100	5
Fibromyalgia	F1	28	200	3	9	C3+2	Cz+2	AC3,RC3+4 ACz+4,RCz					0.9	R100	4
Fibromyalgia	F1	5	200	1	5	Cz	8el;30%		100	1000		200			0
Fibromyalgia	F1	15	200	1	5	Cz	8el;30%		50	1000		200			1.5
Fibromyalgia	F1	20	200	1	5	Cz	8el;30%		80	1000		160			2
Fibromyalgia	F1	25	200	1	5	Cz	8el;30%		100	1000		200			3
Fibromyalgia	F1	30	200	1	5	Cz	8el;30%		100	1000		200			4
Fibromyalgia	F1	30	200	1	5	Cz	8el;30%	ACz-2, RCz+2 ACz(+0,+2), RCz(+0,-2)	100	1000		200	1	R100	3
Fibromyalgia	F1	35	200	1	5	Cz	8el;30%	ACz-2, RCz+2 ACz(+0,+2), RCz(+0,-2)	100	1000		200	1	R100	5
Fibromyalgia	F1	35	200	1	5	Cz	8el;30%	ACz-2, RCz+2 ACz(+0,+2), RCz(+0,-2)	100	1000		200	1	R100	4
Fibromyalgia	F1	35	200	1	5	Cz	8el;30%	ACz-2, RCz+2					1	R100	4.5
Fibromyalgia	F1	40	200	1	5	Cz	8el;30%	ACz-2, RCz+2					1	R100	4
Fibromyalgia	F1	45	200	1	5	Cz	8el;30%	ACz-2, RCz+2	100	1000		200	1	R100	3.5
Fibromyalgia	F1	50	200	1	5	Cz	8el;30%	ACz-2, RCz+2	100	1000		200	1	R100	3
Fibromyalgia	F1	55	200	1	5	Cz	8el;30%	ACz-2, RCz+2	100	1000		150	1	R100	4
Fibromyalgia	F1	55	200	1	5	Cz	8el;30%	ACz-2, RCz+2	100	1000		150	1	R100	4
Fibromyalgia	F1	60	200	1	5	Cz	8el;30%	ACz-2, RCz+2	100	1000		150	1	R100	5
Fibromyalgia	F1	60	200	1	5	Cz	8el;30%	ACz-2, RCz+2	100	1000		150	1	R100	5
Fibromyalgia	F1	60	200	1	5	Cz	8el;30%	ACz-2, RCz+2	100	1000		150	1	R100	5.5
Fibromyalgia	F1	60	200	1	5	Cz	8el;30%	ACz-2, RCz+2	100	1000		150	1	R100	5
Fibromyalgia	F1	60	200	1	5	Cz	8el;30%	ACz-2, RCz+2	100	1000		150	1	R100	4
Fibromyalgia	F1	65	200	1	5	Cz	8el;30%	ACz-2, RCz+2	100	1000		150	1	R100	4
Fibromyalgia	F1	70	200	1	5	Cz	8el;30%	ACz-2, RCz+2	100	1000		150	1	R100	5
Fibromyalgia	F1	70	200	1	5	Cz	8el;30%	ACz-2, RCz+2	100	1000		150	1	R100	5
Fibromyalgia	F1	70	200	1	5	Cz	8el;30%	ACz-2, RCz+2	100	1000		150	1	R100	5.5
Fibromyalgia	F1	70	200	1	5	Cz	8el;30%	ACz-2, RCz+2					1	R100	5
Fibromyalgia	F1	70	200	1	5	Cz	8el;30%	ACz-1.5, RCz+1.5					1	R100	5
Fibromyalgia	F1	70	200	1	5	Cz	8el;30%	ACz-1.5, RCz+1.5					1	R100	4
Fibromyalgia	F1	75	200	1	5	Cz	8el;30%	ACz-1.5, RCz+1.5					1	R100	5
Fibromyalgia	F1	75	200	1	5	Cz	8el;30%	ACz-1.5, RCz+1.5					1	R100	4
Fibromyalgia	F1	80	200	1	5	Cz	8el;30%	ACz-1.5, RCz+1.5					1	R100	4.5
Fibromyalgia	F1	80	200	1	15	Cz	8el;30%	ACz-1.5, RCz+1.5					1	R100	3.5
Fibromyalgia	F1	80	200	1	15	Cz	8el;30%	ACz-1.5, RCz+1.5	100	1000		200	1	R100	4
Fibromyalgia	F1	85	200	1	5	Cz	8el;30%	ACz-1.5, RCz+1.5	100	1000		200	1	R100	4.5
Fibromyalgia	F1	85	200	1	5	Cz	8el;30%	ACz-1.5, RCz+1.5	100	1000		200	1	R100	4.5
Fibromyalgia	F1	85	200	1	15	Cz	8el;30%	ACz-1.5, RCz+1.5	300	100		500	1	R100	5
Fibromyalgia	F1	5	200	1	5	C3+2	Cz+2		200	100		333			0
Fibromyalgia	F1	10	200	1	5	C3+2	Cz+2		200	100		333			0.5
Fibromyalgia	F1	15	200	1	5	C3+2	Cz+2		200	100		333			1
Fibromyalgia	F1	20	200	1	5	C3+2	Cz+2		200	100		333			1.5
Fibromyalgia	F1	25	200	1	5	C3+2	Cz+2		200	200		333			3
Fibromyalgia	F1	30	200	1	5	C3+2	Cz+2		300	200		333			4
Fibromyalgia	F1	30	200	1	5	C3+2	Cz+2	AC3,RC3+4 ACz+4,RCz	300	200		333	1	R100	1.5
Fibromyalgia	F1	35	200	1	5	C3+2	Cz+2	AC3,RC3+4 ACz+4,RCz	300	200		333	1	R100	1.5
Fibromyalgia	F1	35	200	1	5	C3+2	Cz+2	AC3,RC3+4 ACz+4,RCz	300	200		500	1	R100	1
Fibromyalgia	F1	40	200	1	5	C3+2	Cz+2	AC3,RC3+4 ACz+4,RCz	300	200		500	1	R100	1
Fibromyalgia	F1	45	200	1	5	C3+2	Cz+2	AC3,RC3+4 ACz+4,RCz	300	200		500	1	R100	1.5
Fibromyalgia	F1	50	200	1	5	C3+2	Cz+2	AC3,RC3+4 ACz+4,RCz	300	200		500	1	R100	2
Fibromyalgia	F1	55	200	1	5	C3+2	Cz+2	AC3,RC3+4 ACz+4,RCz	200	200		500	1	R100	2
Fibromyalgia	F1	55	200	1	15	C3+2	Cz+2	AC3,RC3+4 ACz+4,RCz	200	200		500	1	R100	3
Fibromyalgia	F1	55	200	1	15	C3+2	Cz+2	AC3,RC3+4 ACz+4,RCz	200	200		500	1	R100	4
Fibromyalgia	F1	45	200	1	75	C3+2	Cz+2	AC3,RC3+4 ACz+4,RCz	200	200		700	1	R100	3
Fibromyalgia	F1	45	200	1	75	C3+2	Cz+2	AC3,RC3+4 ACz+4,RCz					1	R100	3
Fibromyalgia	F1	5	200	1	5	C3+2	Cz+2								0
Fibromyalgia	F1	5	200	1	5	C3+2	Cz+2								0
Fibromyalgia	F1	10	200	1	5	C3+2	Cz+2								0
Fibromyalgia	F1	15	200	1	5	C3+2	Cz+2								0.5
Fibromyalgia	F1	20	200	1	5	C3+2	Cz+2								1
Fibromyalgia	F1	25	200	1	5	C3+2	Cz+2								2
Fibromyalgia	F1	30	200	1	5	C3+2	Cz+2		750	100		500			3
Fibromyalgia	F1	35	200	1	5	C3+2	Cz+2		750	100		500			4
Fibromyalgia	F1	35	200	1	5	C3+2	Cz+2	AC3,RC3+4 ACz+4,RCz	750	100		500	1	R100	1
Fibromyalgia	F1	40	200	1	5	C3+2	Cz+2	AC3,RC3+4 ACz+4,RCz	750	100		500	1	R100	2
Fibromyalgia	F1	45	200	1	5	C3+2	Cz+2	AC3,RC3+4 ACz+4,RCz	750	100		500	1	R100	4
Fibromyalgia	F1	45	200	1	5	C3+2	Cz+2	AC3,RC3+4 ACz+4,RCz	750	100		500	1	R100	4
Fibromyalgia	F1	45	200	1	5	C3+2	Cz+2	AC3,RC3+4 ACz+4,RCz	750	100		500	1	R100	4
Fibromyalgia	F1	50	200	1	5	C3+2	Cz+2	AC3,RC3+4 ACz+4,RCz	750	100		500	1	R100	4.5
Fibromyalgia	F1	50	200	1	5	C3+2	Cz+2	AC3,RC3+4 ACz+4,RCz	750	100		500	1	R100	4
Fibromyalgia	F1	50	200	1	5	C3+2	Cz+2	AC3,RC3+4 ACz+4,RCz	750	100		500	1	R100	3
Fibromyalgia	F1	55	200	1	5	C3+2	Cz+2	AC3,RC3+4 ACz+4,RCz	750	100		500	1	R100	4.5
Fibromyalgia	F1	50	200	1	5	C3+2	Cz+2	AC3,RC3+4 ACz+4,RCz	750	100		500	1	R100	4
Fibromyalgia	F1	50	200	1	15	C3+2	Cz+2	AC3,RC3+4 ACz+4,RCz	750	100		500	1	R100	5
Fibromyalgia	F1	50	200	1	5	C3+2	Cz+2	AC3,RC3+4 ACz+4,RCz	750	100		500	1	R100	4
Fibromyalgia	F1	50	200	1	15	C3+2	Cz+2	AC3,RC3+4 ACz+4,RCz	750	100		500	1	R100	4
Fibromyalgia	F1	55	200	1	5	C3+2	Cz+2	AC3,RC3+4 ACz+4,RCz	750	100		500	1	R100	4
Fibromyalgia	F1	60	200	1	5	C3+2	Cz+2	AC3,RC3+4 ACz+4,RCz	750	100		500	1	R100	4.5
Fibromyalgia	F1	60	200	1	5	C3+2	Cz+2	AC3,RC3+4 ACz+4,RCz	750	100		500	1	R100	4.5
Fibromyalgia	F1	60	200	1	5	C3+2	Cz+2	AC3,RC3+4 ACz+4,RCz	750	100		500	1	R100	3.5
Fibromyalgia	F1	60	200	1	15	C3+2	Cz+2	AC3,RC3+4 ACz+4,RCz	750	100		500	1	R100	4
Fibromyalgia	F1	50	200	1	5	C3+2	Cz+2	AC3,RC3+4 ACz+4,RCz	750	100		500	1	R100	3
Fibromyalgia	F1	10	200	1	5	C3+2	Cz+2		750	100		500			0
Fibromyalgia	F1	20	200	1	5	C3+2	Cz+2		750	100		500			1
Fibromyalgia	F1	30	200	1	5	C3+2	Cz+2		750	100		500			2
Fibromyalgia	F1	35	200	1	5	C3+2	Cz+2		200	200		500			2.5
Fibromyalgia	F1	35	200	1	15	C3+2	Cz+2		200	200		500			3
Fibromyalgia	F1	38	200	1	15	C3+2	Cz+2		200	200		500			3.3
Fibromyalgia	F1	40	200	1	15	C3+2	Cz+2		200	200		500			4
Fibromyalgia	F1	42	200	1	5	C3+2	Cz+2	AC3,RC3+4 ACz+4,RCz	200	200		500	1	R100	2.5
Fibromyalgia	F1	42	200	1	15	C3+2	Cz+2	AC3,RC3+4 ACz+4,RCz	200	200		500	1	R100	3
Fibromyalgia	F1	42	200	1	15	C3+2	Cz+2	AC3,RC3+4 ACz+4,RCz	200	200		500	1	R100	3
Fibromyalgia	F1	40	200	1	15	C3+2	Cz+2	AC3,RC3+4 ACz+4,RCz	200	200		500	1	R100	3.5
Fibromyalgia	F1	38	200	1	15	C3+2	Cz+2	AC3,RC3+4 ACz+4,RCz	200	200		500	1	R100	3
Fibromyalgia	F1	38	200	1	15	C3+2	Cz+2	AC3,RC3+4 ACz+4,RCz	750	100		500	1	R100	3
Fibromyalgia	F1	38	200	1	15	C3+2	Cz+2	AC3,RC3+4 ACz+4,RCz	750	100		500	1	R100	3.5
Fibromyalgia	F1	38	200	1	15	C3+2	Cz+2	AC3,RC3+4 ACz+4,RCz	200	200		500	1	R100	3
Fibromyalgia	F1	38	200	1	15	C3+2	Cz+2	AC3,RC3+4 ACz+4,RCz	200	200		500	1	R100	2
Fibromyalgia	F1	38	200	1	15	C3+2	Cz+2	AC3,RC3+4 ACz+4,RCz	200	200		500	1	R100	2.5
Fibromyalgia	F1	45	200	1	5	C3+2	Cz+2	AC3,RC3+4 ACz+4,RCz	200	200		500	1	R100	2.5
Fibromyalgia	F1	50	200	1	5	C3+2	Cz+2	AC3,RC3+4 ACz+4,RCz	200	200		500	1	R100	4
Fibromyalgia	F1	50	200	1	5	C3+2	Cz+2	AC3,RC3+4 ACz+4,RCz	200	200		500	1	R100	4
Fibromyalgia	F1	50	200	1	5	C3+2	Cz+2	AC3,RC3+4 ACz+4,RCz	200	200		500	1	R100	3.9
Fibromyalgia	F1	50	200	1	5	C3+2	Cz+2	AC3,RC3+4 ACz+4,RCz	200	200		500	1	R100	4
Fibromyalgia	F1	50	200	1	5	C3+2	Cz+2	AC3,RC3+4 ACz+4,RCz	200	200		500	1	R100	3.5
Fibromyalgia	F1	50	200	1	5	C3+2	Cz+2	AC3,RC3+4 ACz+4,RCz	200	200		500	1	R100	3
Fibromyalgia	F1	50	200	1	15	C3+2	Cz+2	AC3,RC3+4 ACz+4,RCz	200	200		500	1	R100	4
Fibromyalgia	F1	50	200	1	5	C3+2	Cz+2	AC3,RC3+4 ACz+4,RCz	200	200		500	1	R100	3.5
Fibromyalgia	F1	55	200	1	5	C3+2	Cz+2	AC3,RC3+4 ACz+4,RCz	200	200		500	1	R100	3.5
Fibromyalgia	F1	45	200	1	15	C3+2	Cz+2	AC3,RC3+4 ACz+4,RCz					0.8	R100	2.5
Fibromyalgia	F1	55	200	1	15	C3+2	Cz+2	AC3,RC3+4 ACz+4,RCz					0.8	R100	4
Fibromyalgia	F1	45	200	1	75	C3+2	Cz+2	AC3,RC3+4 ACz+4,RCz					0.8	R100	2.5
Fibromyalgia	F1	10	200	1	5	C3+2	Cz+2		750	100		500			0
Fibromyalgia	F1	20	200	1	5	C3+2	Cz+2		750	100		500			1
Fibromyalgia	F1	30	200	1	5	C3+2	Cz+2		1000	100		500			2
Fibromyalgia	F1	35	200	1	5	C3+2	Cz+2		1000	100		500			3
Fibromyalgia	F1	40	200	1	5	C3+2	Cz+2		200	200		500			4
Fibromyalgia	F1	40	200	1	5	C3+2	Cz+2	AC3,RC3+4 ACz+4,RCz	200	200		500	1	R100	1
Fibromyalgia	F1	40	200	1	15	C3+2	Cz+2	AC3,RC3+4 ACz+4,RCz	200	200		500	1	R100	1
Fibromyalgia	F1	45	200	1	15	C3+2	Cz+2	AC3,RC3+4 ACz+4,RCz	200	200		500	1	R100	2
Fibromyalgia	F1	40	200	1	15	C3+2	Cz+2	AC3,RC3+4 ACz+4,RCz	200	200		500	1	R100	2
Fibromyalgia	F1	40	200	1	15	C3+2	Cz+2	AC3,RC3+4 ACz+4,RCz	300	200		500	1	R100	2
Fibromyalgia	F1	40	200	1	15	C3+2	Cz+2	AC3,RC3+4 ACz+4,RCz	200	200		500	1	R100	3
Fibromyalgia	F1	40	200	1	15	C3+2	Cz+2	AC3,RC3+4 ACz+4,RCz	200	200		500	1	R100	2
Fibromyalgia	F1	40	200	1	15	C3+2	Cz+2	AC3,RC3+4 ACz+4,RCz	200	200		500	1	R100	2.3
Fibromyalgia	F1	50	200	1	5	C3+2	Cz+2	AC3,RC3+4 ACz+4,RCz	200	200		500	1	R100	4
Fibromyalgia	F1	50	200	1	5	C3+2	Cz+2	AC3,RC3+4 ACz+4,RCz	200	200		500	1	R100	3
Fibromyalgia	F1	50	200	1	5	C3+2	Cz+2	AC3,RC3+4 ACz+4,RCz	200	200		500	1	R100	4
Fibromyalgia	F1	10	200	1	5	Cz	8el;30%		200	200		500			0
Fibromyalgia	F1	20	200	1	5	Cz	8el;30%		200	200		500			1
Fibromyalgia	F1	30	200	1	5	Cz	8el;30%		200	200		500			2
Fibromyalgia	F1	40	200	1	5	Cz	8el;30%		200	200		500			3.5
Fibromyalgia	F1	40	200	1	5	Cz	8el;30%	ACz-1.5, RCz+1.5	750	100		500	1	R100	3
Fibromyalgia	F1	40	200	1	5	Cz	8el;30%	ACz-1.5, RCz+1.5	200	200		500	1	R100	3
Fibromyalgia	F1	40	200	1	5	Cz	8el;30%	ACz-1.5, RCz+1.5	200	200		500	1	R100	2.5
Fibromyalgia	F1	50	200	1	5	Cz	8el;30%	ACz-1.5, RCz+1.5	200	200		500	1	R100	3.5
Fibromyalgia	F1	50	200	1	5	Cz	8el;30%	ACz-1.5, RCz+1.5	200	200		500	1	R100	3.5
Fibromyalgia	F1	50	200	1	5	Cz	8el;30%	ACz-1.5, RCz+1.5	200	200		500	1	R100	3
Fibromyalgia	F1	50	200	1	5	Cz	8el;30%	ACz-2, RCz+2	200	200		500	1	R100	2.5
Fibromyalgia	F1	60	200	1	5	Cz	8el;30%	ACz-2, RCz+2	200	200		500	1	R100	4
Fibromyalgia	F1	60	200	1	5	Cz	8el;30%	ACz-2, RCz+2	200	200		500	1	R100	4.1
Fibromyalgia	F1	60	200	1	5	Cz	8el;30%	ACz-2, RCz+2	200	200		500	1	R100	4.1
Fibromyalgia	F1	60	200	1	5	Cz	8el;30%	ACz-2, RCz+2	200	200		500	1	R100	3.5
Fibromyalgia	F1	70	200	1	5	Cz	8el;30%	ACz-2, RCz+2	200	200		500	1	R100	4
Fibromyalgia	F1	70	200	1	5	Cz	8el;30%	ACz-2, RCz+2	200	200		500	1	R100	4
Fibromyalgia	F1	70	200	1	5	Cz	8el;30%	ACz-2, RCz+2	200	200		500	1	R100	3.5
Fibromyalgia	F1	70	200	1	5	Cz	8el;30%	ACz-2, RCz+2	200	200		500	1	R100	3.5
Fibromyalgia	F1	75	200	1	5	Cz	8el;30%	ACz-2, RCz+2					1	R100	3
Fibromyalgia	F1	75	200	1	5	Cz	8el;30%	ACz-2, RCz+2					1	R100	2.5
Fibromyalgia	F1	75	200	1	15	Cz	8el;30%	ACz-2, RCz+2					1	R100	3
Fibromyalgia	F1	80	200	1	15	Cz	8el;30%	ACz-2, RCz+2					1	R100	4
Fibromyalgia	F1	80	200	1	5	Cz	8el;30%	ACz-2, RCz+2					1	R100	4
Fibromyalgia	F1	80	200	1	5	Cz	8el;30%	ACz-2, RCz+2					1	R100	3.5
Fibromyalgia	F1	80	200	1	5	Cz	8el;30%	ACz-2, RCz+2					1	R100	2.5
Fibromyalgia	F1	80	200	1	5	Cz	8el;30%	ACz-2, RCz+2					1	R100	3
Fibromyalgia	F1	80	200	1	15	Cz	8el;30%	ACz-2, RCz+2					1	R100	4
Fibromyalgia	F1	78	200	1	15	Cz	8el;30%	ACz-2, RCz+2					1	R100	4
Fibromyalgia	F1	80	200	1	5	Cz	8el;30%	ACz-2, RCz+2					1	R100	3
Fibromyalgia	F1	78	200	1	75	Cz	8el;30%	ACz-2, RCz+2					1	R100	3.5
Fibromyalgia	F1	80	200	1	75	Cz	8el;30%	ACz-2, RCz+2					1	R100	3
Fibromyalgia	F1	80	200	1	75	Cz	8el;30%	ACz-2, RCz+2	200	200		500	1	R100	3
Fibromyalgia	F1	80	200	1	75	Cz	8el;30%	ACz-2, RCz+2	200	200		500	1	R100	3.9
Fibromyalgia	F1	80	200	1	75	Cz	8el;30%	ACz-2, RCz+2	750	100		500	1	R100	3.5
Fibromyalgia	F1	80	200	1	75	Cz	8el;30%	ACz-2, RCz+2	750	100		500	1	R100	3.5
Fibromyalgia	F1	80	200	1	75	Cz	8el;30%	ACz-2, RCz+2	750	100		500	1	R100	3.5
Fibromyalgia	F1	80	200	1	75	Cz	8el;30%	ACz-2, RCz+2	300	100		500	1	R100	3.4
Fibromyalgia	F1	80	200	1	75	Cz	8el;30%	ACz-2, RCz+2	200	100		333	1	R100	3.4
Fibromyalgia	F1	80	200	1	75	Cz	8el;30%	ACz-2, RCz+2	200	100		333	1	R100	3.4
Fibromyalgia	F1	80	200	1	75	Cz	8el;30%	ACz-2, RCz+2	750	100		333	1	R100	3.5
Fibromyalgia	F1	80	200	1	75	Cz	8el;30%	ACz-2, RCz+2	200	200		500	1	R100	3.5
Fibromyalgia	F1	80	200	1	75	Cz	8el;30%	ACz-2, RCz+2	200	200		500	1	R100	3.4
Fibromyalgia	F1	10	200	1	5	Cz	8el;30%		250	300		500			0
Fibromyalgia	F1	20	200	1	5	Cz	8el;30%		250	300		500			0.5
Fibromyalgia	F1	30	200	1	5	Cz	8el;30%		250	300		500			1
Fibromyalgia	F1	40	200	1	5	Cz	8el;30%		250	250		500			2
Fibromyalgia	F1	50	200	1	5	Cz	8el;30%		250	250		500			3
Fibromyalgia	F1	60	200	1	5	Cz	8el;30%		250	250		500			4
Fibromyalgia	F1	60	200	1	5	Cz	8el;30%	ACz-2, RCz+2	250	250		500	1	R100	2
Fibromyalgia	F1	70	200	1	5	Cz	8el;30%	ACz-2, RCz+2	250	250		500	1	R100	3.5
Fibromyalgia	F1	70	200	1	5	Cz	8el;30%	ACz-2, RCz+2	250	250		500	1	R100	3
Fibromyalgia	F1	80	200	1	5	Cz	8el;30%	ACz-2, RCz+2	250	250		500	1	R100	4
Fibromyalgia	F1	80	200	1	5	Cz	8el;30%	ACz-2, RCz+2	250	250		500	1	R100	4
Fibromyalgia	F1	80	200	1	5	Cz	8el;30%	ACz-2, RCz+2	250	250		500	1	R100	3.5
Fibromyalgia	F1	80	200	1	15	Cz	8el;30%	ACz-2, RCz+2	250	250		500	1	R100	3
Fibromyalgia	F1	75	200	1	15	Cz	8el;30%	ACz-2, RCz+2	250	250		500	1	R100	3
Fibromyalgia	F1	75	200	1	15	Cz	8el;30%	ACz-2, RCz+2	250	250		500	1	R100	4
Fibromyalgia	F1	75	200	1	15	Cz	8el;30%	ACz-2, RCz+2	250	250		500	1	R100	4
Fibromyalgia	F1	75	200	1	75	Cz	8el;30%	ACz-2, RCz+2					1	R100	3.5
Fibromyalgia	F1	80	200	1	75	Cz	8el;30%	ACz-2, RCz+2					1	R100	3.5
Fibromyalgia	F1	80	200	1	75	Cz	8el;30%	ACz-2, RCz+2					1	R100	1
Fibromyalgia	F1	80	200	1	75	Cz	8el;30%	ACz-2, RCz+2					1	R100	2.5
Fibromyalgia	F1	80	200	1	75	Cz	8el;30%	ACz-2, RCz+2					1	R100	3
Fibromyalgia	F1	80	200	1	75	Cz	8el;30%	ACz-2, RCz+2					1	R100	2.5
Fibromyalgia	F1	80	200	1	75	Cz	8el;30%	ACz-2, RCz+2					1	R100	2.5
Fibromyalgia	F1	80	200	1	75	Cz	8el;30%	ACz-2, RCz+2					1	R100	2.5
Fibromyalgia	F1	80	200	1	75	Cz	8el;30%	ACz-2, RCz+2					1	R100	2.5
Fibromyalgia	F1	80	200	1	75	Cz	8el;30%	ACz-2, RCz+2					1	R100	2.5
Fibromyalgia	F1	80	200	1	75	Cz	8el;30%	ACz-2, RCz+2					1	R100	2.5
Fibromyalgia	F1	80	200	1	75	Cz	8el;30%	ACz-2, RCz+2					1	R100	3
Fibromyalgia	F1	10	200	1	5	Cz	8el;30%		250	250		500			0
Fibromyalgia	F1	20	200	1	5	Cz	8el;30%		250	250		500			0.5
Fibromyalgia	F1	30	200	1	5	Cz	8el;30%		250	250		500			1
Fibromyalgia	F1	40	200	1	5	Cz	8el;30%		250	250		500			1.5
Fibromyalgia	F1	50	200	1	5	Cz	8el;30%		250	250		500			2.5
Fibromyalgia	F1	60	200	1	5	Cz	8el;30%		250	250		500			3.5
Fibromyalgia	F1	60	200	1	5	Cz	8el;30%	ACz-2, RCz+2	250	250		500	1	R100	3.5
Fibromyalgia	F1	70	200	1	5	Cz	8el;30%	ACz-2, RCz+2	250	250		500	1	R100	3.5
Fibromyalgia	F1	70	200	1	5	Cz	8el;30%	ACz-2, RCz+2	250	250		500	1	R100	2.5
Fibromyalgia	F1	80	200	1	5	Cz	8el;30%	ACz-2, RCz+2	250	250		500	1	R100	3.5
Fibromyalgia	F1	80	200	1	5	Cz	8el;30%	ACz-2, RCz+2	250	250		500	1	R100	3
Fibromyalgia	F1	80	200	1	15	Cz	8el;30%	ACz-2, RCz+2	250	250		500	1	R100	3.5
Fibromyalgia	F1	80	200	1	15	Cz	8el;30%	ACz-2, RCz+2	250	250		500	1	R100	4
Fibromyalgia	F1	80	200	1	5	Cz	8el;30%	ACz-2, RCz+2	250	250		500	1	R100	3
Fibromyalgia	F1	80	200	1	15	Cz	8el;30%	ACz-2, RCz+2	250	250		500	1	R100	3
Fibromyalgia	F1	80	200	1	75	Cz	8el;30%	ACz-2, RCz+2	250	250		500	1	R100	4
Fibromyalgia	F1	80	200	1	75	Cz	8el;30%	ACz-2, RCz+2	250	250		500	1	R100	3.8
Fibromyalgia	F1	80	200	1	75	Cz	8el;30%	ACz-2, RCz+2					1	R100	3
Fibromyalgia	F1	80	200	1	75	Cz	8el;30%	ACz-2, RCz+2					1	R100	3
Fibromyalgia	F1	80	200	1	75	Cz	8el;30%	ACz-2, RCz+2					1	R100	3
Fibromyalgia	F1	80	200	1	75	Cz	8el;30%	ACz-2, RCz+2					1	R100	3
Fibromyalgia	F1	80	200	1	75	Cz	8el;30%	ACz-2, RCz+2					1	R100	3
Fibromyalgia	F1	80	200	1	75	Cz	8el;30%	ACz-2, RCz+2					1	R100	3
Fibromyalgia	F1	80	200	1	75	Cz	8el;30%	ACz-2, RCz+2					1	R100	3
Fibromyalgia	F1	80	200	1	75	Cz	8el;30%	ACz-2, RCz+2					1	R100	3
Fibromyalgia	F1	80	200	1	75	Cz	8el;30%	ACz-2, RCz+2					1	R100	2.9
Fibromyalgia	F1	80	200	1	75	Cz	8el;30%	ACz-2, RCz+2					1	R100	2.5
Fibromyalgia	F1	10	200	1	5	Cz	8el;30%		250	250		500			0
Fibromyalgia	F1	20	200	1	5	Cz	8el;30%		250	250		500			0.5
Fibromyalgia	F1	30	200	1	5	Cz	8el;30%		250	300		500			1
Fibromyalgia	F1	40	200	1	5	Cz	8el;30%		250	300		500			2
Fibromyalgia	F1	50	200	1	5	Cz	8el;30%		250	300		500			3
Fibromyalgia	F1	60	200	1	5	Cz	8el;30%		250	300		500			4
Fibromyalgia	F1	60	200	1	5	Cz	8el;30%	ACz-2, RCz+2	250	300		500	1	R100	2
Fibromyalgia	F1	60	200	1	5	Cz	8el;30%	ACz-2, RCz+2	250	300		500	1	R100	3
Fibromyalgia	F1	60	200	1	5	Cz	8el;30%	ACz-2, RCz+2	250	300		500	1	R100	3
Fibromyalgia	F1	70	200	1	5	Cz	8el;30%	ACz-2, RCz+2	250	300		500	1	R100	3
Fibromyalgia	F1	80	200	1	5	Cz	8el;30%	ACz-2, RCz+2	250	300		500	1	R100	3
Fibromyalgia	F1	80	200	1	5	Cz	8el;30%	ACz-2, RCz+2	250	300		500	1	R100	3
Fibromyalgia	F1	80	200	1	5	Cz	8el;30%	ACz-2, RCz+2	250	300		500	1	R100	3
Fibromyalgia	F1	80	200	1	5	Cz	8el;30%	ACz-2, RCz+2	250	300		500	1	R100	2.5
Fibromyalgia	F1	80	200	1	15	Cz	8el;30%	ACz-2, RCz+2	250	300		500	1	R100	3
Fibromyalgia	F1	80	200	1	5	Cz	8el;30%	ACz-2, RCz+2	250	300		500	1	R100	2.7
Fibromyalgia	F1	80	200	1	75	Cz	8el;30%	ACz-2, RCz+2	250	300		500	1	R100	4.5
Fibromyalgia	F1	80	200	1	5	Cz	8el;30%	ACz-2, RCz+2					1	R100	3
Fibromyalgia	F1	80	200	1	15	Cz	8el;30%	ACz-2, RCz+2					1	R100	3
Fibromyalgia	F1	80	200	1	75	Cz	8el;30%	ACz-2, RCz+2					1	R100	3
Fibromyalgia	F1	80	200	1	75	Cz	8el;30%	ACz-2, RCz+2					1	R100	3
Fibromyalgia	F1	80	200	1	75	Cz	8el;30%	ACz-2, RCz+2					1	R100	3
Fibromyalgia	F1	80	200	1	75	Cz	8el;30%	ACz-2, RCz+2					1	R100	3
Fibromyalgia	F1	80	200	1	75	Cz	8el;30%	ACz-2, RCz+2					1	R100	3
Fibromyalgia	F1	10	200	1	5	Cz	8el;30%		250	300		500			0
Fibromyalgia	F1	20	200	1	5	Cz	8el;30%		250	300		500			0.5
Fibromyalgia	F1	30	200	1	5	Cz	8el;30%		250	300		500			1
Fibromyalgia	F1	40	200	1	5	Cz	8el;30%		250	300		500			2
Fibromyalgia	F1	50	200	1	5	Cz	8el;30%		250	300		500			3
Fibromyalgia	F1	60	200	1	5	Cz	8el;30%		250	300		500			4
Fibromyalgia	F1	60	200	1	5	Cz	8el;30%	ACz-2, RCz+2	250	300		500	1	R100	2
Fibromyalgia	F1	70	200	1	5	Cz	8el;30%	ACz-2, RCz+2	250	300		500	1	R100	2
Fibromyalgia	F1	80	200	1	5	Cz	8el;30%	ACz-2, RCz+2	250	300		500	1	R100	3.5
Fibromyalgia	F1	80	200	1	5	Cz	8el;30%	ACz-2, RCz+2	250	300		500	1	R100	3
Fibromyalgia	F1	80	200	1	5	Cz	8el;30%	ACz-2, RCz+2	250	300		500	1	R100	4
Fibromyalgia	F1	80	200	1	15	Cz	8el;30%	ACz-2, RCz+2	250	300		500	1	R100	3.5
Fibromyalgia	F1	70	200	1	5	Cz	8el;30%	ACz-2, RCz+2	250	300		500	1	R100	2.3
Fibromyalgia	F1	80	200	1	5	Cz	8el;30%	ACz-2, RCz+2	250	300		500	1	R100	3
Fibromyalgia	F1	80	200	1	5	Cz	8el;30%	ACz-2, RCz+2	250	300		500	1	R100	3
Fibromyalgia	F1	80	200	1	5	Cz	8el;30%	ACz-2, RCz+2	250	300		500	1	R100	3.5
Fibromyalgia	F1	80	200	1	5	Cz	8el;30%	ACz-2, RCz+2					1	R100	3
Fibromyalgia	F1	80	200	1	5	Cz	8el;30%	ACz-2, RCz+2					1	R100	3
Fibromyalgia	F1	80	200	1	5	Cz	8el;30%	ACz-2, RCz+2					1	R100	4
Fibromyalgia	F1	80	200	1	5	Cz	8el;30%	ACz-2, RCz+2					0.5	R100	3.5
Fibromyalgia	F1	80	200	1	5	Cz	8el;30%	ACz-2, RCz+2					1	R100	3
Fibromyalgia	F1	80	200	1	5	Cz	8el;30%	ACz-2, RCz+2					1	R100	3
Fibromyalgia	F1	80	200	1	15	Cz	8el;30%	ACz-2, RCz+2					1	R100	2.8
Fibromyalgia	F1	80	200	1	75	Cz	8el;30%	ACz-2, RCz+2					1	R100	3.5
Fibromyalgia	F1	80	200	1	75	Cz	8el;30%	ACz-2, RCz+2					1	R100	3
Fibromyalgia	F1	80	200	1	75	Cz	8el;30%	ACz-2, RCz+2					1	R100	3
Fibromyalgia	F1	80	200	1	75	Cz	8el;30%	ACz-2, RCz+2					1	R100	2.9
Fibromyalgia	F1	80	200	1	75	Cz	8el;30%	ACz-2, RCz+2					1	R100	2.9
Fibromyalgia	F1	80	200	1	75	Cz	8el;30%	ACz-2, RCz+2					1	R100	2.5
Fibromyalgia	F1	80	200	1	75	Cz	8el;30%	ACz-2, RCz+2					1	R100	2.5
Fibromyalgia	F1	5	200	1	5	C3+2	Cz+2		250	250		500			0
Fibromyalgia	F1	10	200	1	5	C3+2	Cz+2		250	250		500			0
Fibromyalgia	F1	10	200	1	5	C3+2	Cz+2		250	250		800			1
Fibromyalgia	F1	15	200	1	5	C3+2	Cz+2		250	250		400			1
Fibromyalgia	F1	20	200	1	5	C3+2	Cz+2		200	200		500			1
Fibromyalgia	F1	25	200	1	5	C3+2	Cz+2		200	200		500			1.5
Fibromyalgia	F1	30	200	1	5	C3+2	Cz+2		200	200		500			2
Fibromyalgia	F1	35	200	1	5	C3+2	Cz+2		200	200		500			3
Fibromyalgia	F1	40	200	1	5	C3+2	Cz+2		200	200		500			4
Fibromyalgia	F1	40	200	1	5	C3+2	Cz+2	AC3,RC3+4 ACz+4,RCz	200	200		500	1	R100	1
Fibromyalgia	F1	45	200	1	5	C3+2	Cz+2	AC3,RC3+4 ACz+4,RCz	200	200		500	1	R100	2
Fibromyalgia	F1	45	200	1	15	C3+2	Cz+2	AC3,RC3+4 ACz+4,RCz	200	200		500	1	R100	2.5
Fibromyalgia	F1	45	200	1	75	C3+2	Cz+2	AC3,RC3+4 ACz+4,RCz	200	200		500	1	R100	3.5
Fibromyalgia	F1	45	200	1	75	C3+2	Cz+2	AC3,RC3+4 ACz+4,RCz	200	200		500	1	R100	3.5
Fibromyalgia	F1	45	200	1	75	C3+2	Cz+2	AC3,RC3+4 ACz+4,RCz	200	200		500	1	R100	3
Fibromyalgia	F1	45	200	1	75	C3+2	Cz+2	AC3,RC3+4 ACz+4,RCz	200	200		500	1	R100	2.5
Fibromyalgia	F1	45	200	1	75	C3+2	Cz+2	AC3,RC3+4 ACz+4,RCz	200	200		500	1	R100	2.5
Fibromyalgia	F1	45	200	1	75	C3+2	Cz+2	AC3,RC3+4 ACz+4,RCz					1	R100	2.5
Fibromyalgia	F1	45	200	1	75	C3+2	Cz+2	AC3,RC3+4 ACz+4,RCz					1	R100	2.5
Fibromyalgia	F1	45	200	1	75	C3+2	Cz+2	AC3,RC3+4 ACz+4,RCz					1	R100	2.3
Fibromyalgia	F1	45	200	1	75	C3+2	Cz+2	AC3,RC3+4 ACz+4,RCz					1	R100	2.2
Fibromyalgia	F1	45	200	1	75	C3+2	Cz+2	AC3,RC3+4 ACz+4,RCz					1	R100	2.2
Fibromyalgia	F1	45	200	1	75	C3+2	Cz+2	AC3,RC3+4 ACz+4,RCz					1	R100	2
Fibromyalgia	F1	45	200	1	75	C3+2	Cz+2	AC3,RC3+4 ACz+4,RCz					1	R100	2
Fibromyalgia	F1	45	200	1	75	C3+2	Cz+2	AC3,RC3+4 ACz+4,RCz					1	R100	2
Fibromyalgia	F1	5	200	1	5	C3+2	Cz+2								0
Fibromyalgia	F1	15	200	1	5	C3+2	Cz+2		750	100		500			0.5
Fibromyalgia	F1	25	200	1	5	C3+2	Cz+2		750	100		500			1.5
Fibromyalgia	F1	35	200	1	5	C3+2	Cz+2		750	100		500			3
Fibromyalgia	F1	40	200	1	5	C3+2	Cz+2		750	100		500			4
Fibromyalgia	F1	40	200	1	5	C3+2	Cz+2	AC3,RC3+4 ACz+4,RCz	750	100		500	1	R100	2
Fibromyalgia	F1	45	200	1	5	C3+2	Cz+2	AC3,RC3+4 ACz+4,RCz	750	100		500	1	R100	3.5
Fibromyalgia	F1	45	200	1	5	C3+2	Cz+2	AC3,RC3+4 ACz+4,RCz	750	100		500	1	R100	3
Fibromyalgia	F1	45	200	1	15	C3+2	Cz+2	AC3,RC3+4 ACz+4,RCz	750	100		500	1	R100	3.5
Fibromyalgia	F1	45	200	1	15	C3+2	Cz+2	AC3,RC3+4 ACz+4,RCz	750	100		500	1	R100	3.8
Fibromyalgia	F1	45	200	1	75	C3+2	Cz+2	AC3,RC3+4 ACz+4,RCz	750	100		500	1	R100	3.5
Fibromyalgia	F1	45	200	1	75	C3+2	Cz+2	AC3,RC3+4 ACz+4,RCz	750	100		500	1	R100	3
Fibromyalgia	F1	45	200	1	75	C3+2	Cz+2	AC3,RC3+4 ACz+4,RCz	750	100		500	1	R100	3
Fibromyalgia	F1	45	200	1	75	C3+2	Cz+2	AC3,RC3+4 ACz+4,RCz	750	100		500	1	R100	3
Fibromyalgia	F1	45	200	1	75	C3+2	Cz+2	AC3,RC3+4 ACz+4,RCz	750	100		500	1	R100	2.5
Fibromyalgia	F1	45	200	1	75	C3+2	Cz+2	AC3,RC3+4 ACz+4,RCz	750	100		500	1	R100	2
Fibromyalgia	F1	45	200	1	75	C3+2	Cz+2	AC3,RC3+4 ACz+4,RCz	750	100		500	1	R100	2
Fibromyalgia	F1	45	200	1	75	C3+2	Cz+2	AC3,RC3+4 ACz+4,RCz					1	R100	2
Fibromyalgia	F1	45	200	1	75	C3+2	Cz+2	AC3,RC3+4 ACz+4,RCz					1	R100	2
Fibromyalgia	F1	45	200	1	75	C3+2	Cz+2	AC3,RC3+4 ACz+4,RCz					1	R100	2
Fibromyalgia	F1	45	200	1	75	C3+2	Cz+2	AC3,RC3+4 ACz+4,RCz					1	R100	2
Fibromyalgia	F1	45	200	1	75	C3+2	Cz+2	AC3,RC3+4 ACz+4,RCz					1	R100	2
Fibromyalgia	F1	45	200	1	75	C3+2	Cz+2	AC3,RC3+4 ACz+4,RCz					1	R100	2
Fibromyalgia	F1	10	200	1	5	C3+2	Cz+2		750	100		500			0
Fibromyalgia	F1	20	200	1	5	C3+2	Cz+2		750	100		500			0.5
Fibromyalgia	F1	30	200	1	5	C3+2	Cz+2		750	100		500			1
Fibromyalgia	F1	40	200	1	5	C3+2	Cz+2		750	100		500			2
Fibromyalgia	F1	45	200	1	5	C3+2	Cz+2		750	100		500			3
Fibromyalgia	F1	50	200	1	5	C3+2	Cz+2		750	100		500			4.5
Fibromyalgia	F1	50	200	1	5	C3+2	Cz+2	AC3,RC3+4 ACz+4,RCz	750	100		500	1	R100	3.5
Fibromyalgia	F1	45	200	1	15	C3+2	Cz+2	AC3,RC3+4 ACz+4,RCz	750	100		500	1	R100	3
Fibromyalgia	F1	45	200	1	15	C3+2	Cz+2	AC3,RC3+4 ACz+4,RCz	750	100		500	1	R100	4.5
Fibromyalgia	F1	45	200	1	5	C3+2	Cz+2	AC3,RC3+4 ACz+4,RCz	750	100		500	1	R100	3.5
Fibromyalgia	F1	45	200	1	5	C3+2	Cz+2	AC3,RC3+4 ACz+4,RCz	750	100		500	1	R100	3
Fibromyalgia	F1	47	200	1	5	C3+2	Cz+2	AC3,RC3+4 ACz+4,RCz	750	100		500	1	R100	3
Fibromyalgia	F1	47	200	1	15	C3+2	Cz+2	AC3,RC3+4 ACz+4,RCz	750	100		500	1	R100	3
Fibromyalgia	F1	45	200	1	75	C3+2	Cz+2	AC3,RC3+4 ACz+4,RCz	750	100		500	1	R100	3
Fibromyalgia	F1	45	200	1	75	C3+2	Cz+2	AC3,RC3+4 ACz+4,RCz	750	100		500	1	R100	2.8
Fibromyalgia	F1	45	200	1	75	C3+2	Cz+2	AC3,RC3+4 ACz+4,RCz	750	100		500	1	R100	2.6
Fibromyalgia	F1	45	200	1	75	C3+2	Cz+2	AC3,RC3+4 ACz+4,RCz	750	100		500	1	R100	2.5
Fibromyalgia	F1	45	200	1	75	C3+2	Cz+2	AC3,RC3+4 ACz+4,RCz					1	R100	2.5
Fibromyalgia	F1	45	200	1	75	C3+2	Cz+2	AC3,RC3+4 ACz+4,RCz					1	R100	2.5
Fibromyalgia	F1	45	200	1	75	C3+2	Cz+2	AC3,RC3+4 ACz+4,RCz					1	R100	2.5
Fibromyalgia	F1	45	200	1	75	C3+2	Cz+2	AC3,RC3+4 ACz+4,RCz					1	R100	2
Fibromyalgia	F1	45	200	1	75	C3+2	Cz+2	AC3,RC3+4 ACz+4,RCz					1	R100	2
Fibromyalgia	F1	45	200	1	75	C3+2	Cz+2	AC3,RC3+4 ACz+4,RCz					1	R100	2
Fibromyalgia	F1	45	200	1	75	C3+2	Cz+2	AC3,RC3+4 ACz+4,RCz					1	R100	2
Fibromyalgia	F1	45	200	1	75	C3+2	Cz+2	AC3,RC3+4 ACz+4,RCz					1	R100	1.9
Fibromyalgia	F1	45	200	1	75	C3+2	Cz+2	AC3,RC3+4 ACz+4,RCz					1	R100	1.9
Fibromyalgia	F1	10	200	1	5	C3+2	Cz+2								0
Fibromyalgia	F1	20	200	1	5	C3+2	Cz+2								1
Fibromyalgia	F1	30	200	1	5	C3+2	Cz+2		750	100		500			2
Fibromyalgia	F1	40	200	1	5	C3+2	Cz+2		750	100		500			3.5
Fibromyalgia	F1	40	200	1	5	C3+2	Cz+2	AC3,RC3+4 ACz+4,RCz	750	100		500	1	R100	3
Fibromyalgia	F1	45	200	1	5	C3+2	Cz+2	AC3,RC3+4 ACz+4,RCz	750	100		500	1	R100	3.5
Fibromyalgia	F1	45	200	1	15	C3+2	Cz+2	AC3,RC3+4 ACz+4,RCz	750	100		500	1	R100	3.5
Fibromyalgia	F1	45	200	1	75	C3+2	Cz+2	AC3,RC3+4 ACz+4,RCz	750	100		500	1	R100	3.5
Fibromyalgia	F1	45	200	1	75	C3+2	Cz+2	AC3,RC3+4 ACz+4,RCz	750	100		500	1	R100	3
Fibromyalgia	F1	45	200	1	75	C3+2	Cz+2	AC3,RC3+4 ACz+4,RCz	750	100		500	1	R100	3
Fibromyalgia	F1	45	200	1	75	C3+2	Cz+2	AC3,RC3+4 ACz+4,RCz	750	100		500	1	R100	3
Fibromyalgia	F1	45	200	1	75	C3+2	Cz+2	AC3,RC3+4 ACz+4,RCz	750	100		500	1	R100	2.5
Fibromyalgia	F1	45	200	1	75	C3+2	Cz+2	AC3,RC3+4 ACz+4,RCz	750	100		500	1	R100	2.5
Fibromyalgia	F1	45	200	1	75	C3+2	Cz+2	AC3,RC3+4 ACz+4,RCz	750	100		500	1	R100	2.5
Fibromyalgia	F1	45	200	1	75	C3+2	Cz+2	AC3,RC3+4 ACz+4,RCz	750	100		500	1	R100	2.5
Fibromyalgia	F1	45	200	1	75	C3+2	Cz+2	AC3,RC3+4 ACz+4,RCz	750	100		500	1	R100	2.5
Fibromyalgia	F1	45	200	1	75	C3+2	Cz+2	AC3,RC3+4 ACz+4,RCz	750	100		500	1	R100	2.5
Fibromyalgia	F1	45	200	1	75	C3+2	Cz+2	AC3,RC3+4 ACz+4,RCz	750	100		500	1	R100	2.25
Fibromyalgia	F1	45	200	1	75	C3+2	Cz+2	AC3,RC3+4 ACz+4,RCz	750	100		500	1	R100	2
Fibromyalgia	F1	45	200	1	75	C3+2	Cz+2	AC3,RC3+4 ACz+4,RCz	750	100		500	1	R100	2
Fibromyalgia	F1	10	200	1	5	Cz	8el;30%								0
Fibromyalgia	F1	20	200	1	5	Cz	8el;30%		750	100		500			1
Fibromyalgia	F1	30	200	1	5	Cz	8el;30%		750	100		500			2
Fibromyalgia	F1	40	200	1	5	Cz	8el;30%		750	100		500			3
Fibromyalgia	F1	50	200	1	5	Cz	8el;30%		750	100		500			4
Fibromyalgia	F1	50	200	1	5	Cz	8el;30%	ACz-2, RCz+2	750	100		500		R100	10
Fibromyalgia	F1	5	200	1	5	Cz	8el;30%		750	100		500			0
Fibromyalgia	F1	15	200	1	5	Cz	8el;30%		750	100		500			0
Fibromyalgia	F1	25	200	1	5	Cz	8el;30%		750	100		500			1
Fibromyalgia	F1	35	200	1	5	Cz	8el;30%		750	100		500			2.5
Fibromyalgia	F1	45	200	1	5	Cz	8el;30%		750	100		500			4
Fibromyalgia	F1							ACz-2, RCz+2					1	R100	0
Fibromyalgia	F1	45	200	1	5	Cz	8el;30%	ACz-2, RCz+2					1	R100	2.8
Fibromyalgia	F1	50	200	1	5	Cz	8el;30%	ACz-2, RCz+2					1	R100	3
Fibromyalgia	F1	50	200	1	5	Cz	8el;30%	ACz-2, RCz+2					1	R100	3.5
Fibromyalgia	F1	60	200	1	5	Cz	8el;30%	ACz-2, RCz+2					1	R100	4
Fibromyalgia	F1	60	200	1	5	Cz	8el;30%	ACz-2, RCz+2					1	R100	3
Fibromyalgia	F1	60	200	1	5	Cz	8el;30%	ACz-2, RCz+2					1	R100	2.5
Fibromyalgia	F1	70	200	1	5	Cz	8el;30%	ACz-2, RCz+2					1	R100	3.5
Fibromyalgia	F1	70	200	1	5	Cz	8el;30%	ACz-2, RCz+2					1	R100	3
Fibromyalgia	F1	70	200	1	5	Cz	8el;30%	ACz-2, RCz+2					1	R100	4
Fibromyalgia	F1	70	200	1	5	Cz	8el;30%	ACz-2, RCz+2					1	R100	4
Fibromyalgia	F1	70	200	1	5	Cz	8el;30%	ACz-2, RCz+2					1	R100	3
Fibromyalgia	F1	70	200	1	5	Cz	8el;30%	ACz-2, RCz+2					1	R100	2
Fibromyalgia	F1	80	200	1	5	Cz	8el;30%	ACz-2, RCz+2					1	R100	3
Fibromyalgia	F1	80	200	1	5	Cz	8el;30%	ACz-2, RCz+2					1	R100	4
Fibromyalgia	F1	80	200	1	5	Cz	8el;30%	ACz-2, RCz+2					1	R100	3
Fibromyalgia	F1	80	200	1	15	Cz	8el;30%	ACz-2, RCz+2	200	200		500	1	R100	3
Fibromyalgia	F1	80	200	1	75	Cz	8el;30%	ACz-2, RCz+2					1	R100	3.5
Fibromyalgia	F1	80	200	1	75	Cz	8el;30%	ACz-2, RCz+2					1	R100	3
Fibromyalgia	F1	80	200	1	75	Cz	8el;30%	ACz-2, RCz+2					1	R100	3
Fibromyalgia	F1	80	200	1	75	Cz	8el;30%	ACz-2, RCz+2					1	R100	3
Fibromyalgia	F1	80	200	1	75	Cz	8el;30%	ACz-2, RCz+2					1	R100	3
Fibromyalgia	F1	80	200	1	75	Cz	8el;30%	ACz-2, RCz+2					1	R100	3
Fibromyalgia	F1	80	200	1	75	Cz	8el;30%	ACz-2, RCz+2					1	R100	3
Fibromyalgia	F1	80	200	1	75	Cz	8el;30%	ACz-2, RCz+2					1	R100	3
Fibromyalgia	F1	80	200	1	75	Cz	8el;30%	ACz-2, RCz+2					1	R100	3
Fibromyalgia	F1	80	200	1	75	Cz	8el;30%	ACz-2, RCz+2					1	R100	3
Fibromyalgia	F1	80	200	1	75	Cz	8el;30%	ACz-2, RCz+2					1	R100	3
Fibromyalgia	F1	80	200	1	75	Cz	8el;30%	ACz-2, RCz+2	200	200		500	1	R100	3
Fibromyalgia	F1	80	200	1	75	Cz	8el;30%	ACz-2, RCz+2	200	200		500	1	R100	3
Fibromyalgia	F1	10	200	1	5	Cz	8el;30%		750	100		500			0
Fibromyalgia	F1	20	200	1	5	Cz	8el;30%		750	100		500			1
Fibromyalgia	F1	30	200	1	5	Cz	8el;30%		750	100		500			2
Fibromyalgia	F1	40	200	1	5	Cz	8el;30%		750	100		500			3
Fibromyalgia	F1	50	200	1	5	Cz	8el;30%		750	100		500			4.5
Fibromyalgia	F1	50	200	1	5	Cz	8el;30%	ACz-2, RCz+2	750	100		500	1	R100	3
Fibromyalgia	F1	50	200	1	5	Cz	8el;30%	ACz-2, RCz+2	750	100		500	1	R100	3
Fibromyalgia	F1	60	200	1	5	Cz	8el;30%	ACz-2, RCz+2	750	100		500	1	R100	4
Fibromyalgia	F1	60	200	1	5	Cz	8el;30%	ACz-2, RCz+2	750	100		500	1	R100	4
Fibromyalgia	F1	60	200	1	5	Cz	8el;30%	ACz-2, RCz+2	750	100		500	1	R100	4.5
Fibromyalgia	F1	60	200	1	5	Cz	8el;30%	ACz-2, RCz+2	750	100		500	1	R100	3.5
Fibromyalgia	F1	70	200	1	5	Cz	8el;30%	ACz-2, RCz+2	750	100		500	1	R100	4.5
Fibromyalgia	F1	70	200	1	5	Cz	8el;30%	ACz-2, RCz+2	750	100		500	1	R100	3.5
Fibromyalgia	F1	70	200	1	5	Cz	8el;30%	ACz-2, RCz+2	750	100		500	1	R100	3.5
Fibromyalgia	F1	80	200	1	5	Cz	8el;30%	ACz-2, RCz+2	750	100		500	1	R100	4
Fibromyalgia	F1	80	200	1	5	Cz	8el;30%	ACz-2, RCz+2	750	100		500	1	R100	4
Fibromyalgia	F1	80	200	1	5	Cz	8el;30%	ACz-2, RCz+2	750	100		500	1	R100	3.5
Fibromyalgia	F1	80	200	1	15	Cz	8el;30%	ACz-2, RCz+2					1	R100	3
Fibromyalgia	F1	80	200	1	75	Cz	8el;30%	ACz-2, RCz+2					1	R100	3
Fibromyalgia	F1	80	200	1	75	Cz	8el;30%	ACz-2, RCz+2					1	R100	3
Fibromyalgia	F1	80	200	1	75	Cz	8el;30%	ACz-2, RCz+2					1	R100	3
Fibromyalgia	F1	80	200	1	75	Cz	8el;30%	ACz-2, RCz+2					1	R100	3
Fibromyalgia	F1	80	200	1	75	Cz	8el;30%	ACz-2, RCz+2					1	R100	3.3
Fibromyalgia	F1	80	200	1	75	Cz	8el;30%	ACz-2, RCz+2					1	R100	3
Fibromyalgia	F1	80	200	1	75	Cz	8el;30%	ACz-2, RCz+2					1	R100	3
Fibromyalgia	F1	80	200	1	75	Cz	8el;30%	ACz-2, RCz+2					1	R100	3
Fibromyalgia	F1	80	200	1	75	Cz	8el;30%	ACz-2, RCz+2					1	R100	2.9
Fibromyalgia	F1	80	200	1	75	Cz	8el;30%	ACz-2, RCz+2					1	R100	2.8
Fibromyalgia	F1	80	200	1	75	Cz	8el;30%	ACz-2, RCz+2					1	R100	2.8
Fibromyalgia	F1	80	200	1	75	Cz	8el;30%	ACz-2, RCz+2					1	R100	2.8
Fibromyalgia	F1	80	200	1	75	Cz	8el;30%	ACz-2, RCz+2					1	R100	2.8
Fibromyalgia	F1	10	200	1	5	Cz	8el;30%		250	300		500			0
Fibromyalgia	F1	20	200	1	5	Cz	8el;30%		250	300		500			1
Fibromyalgia	F1	30	200	1	5	Cz	8el;30%		750	100		500			1.5
Fibromyalgia	F1	40	200	1	5	Cz	8el;30%		750	100		500			3.5
Fibromyalgia	F1	50	200	1	5	Cz	8el;30%		750	100		500			4.5
Fibromyalgia	F1	50	200	1	5	Cz	8el;30%	ACz-2, RCz+2	750	100		500	1	R100	3.5
Fibromyalgia	F1	60	200	1	5	Cz	8el;30%	ACz-2, RCz+2	750	100		500	1	R100	4.5
Fibromyalgia	F1	60	200	1	5	Cz	8el;30%	ACz-2, RCz+2	750	100		500	1	R100	5
Fibromyalgia	F1	60	200	1	5	Cz	8el;30%	ACz-2, RCz+2	750	100		500	1	R100	5
Fibromyalgia	F1	60	200	1	5	Cz	8el;30%	ACz-2, RCz+2	750	100		500	1	R100	4.5
Fibromyalgia	F1	60	200	1	5	Cz	8el;30%	ACz-2, RCz+2	750	100		500	1	R100	4.5
Fibromyalgia	F1	60	200	1	5	Cz	8el;30%	ACz-2, RCz+2	750	100		500	1	R100	4.5
Fibromyalgia	F1	60	200	1	5	Cz	8el;30%	ACz-2, RCz+2	750	100		500	1	R100	3.75
Fibromyalgia	F1	60	200	1	5	Cz	8el;30%	ACz-2, RCz+2	750	100		500	1	R100	3
Fibromyalgia	F1	70	200	1	5	Cz	8el;30%	ACz-2, RCz+2	750	100		500	1	R100	4
Fibromyalgia	F1	70	200	1	5	Cz	8el;30%	ACz-2, RCz+2	750	100		500	1	R100	3
Fibromyalgia	F1	80	200	1	5	Cz	8el;30%	ACz-2, RCz+2	750	100		500	1	R100	4.25
Fibromyalgia	F1	80	200	1	5	Cz	8el;30%	ACz-2, RCz+2					1	R100	4.25
Fibromyalgia	F1	80	200	1	5	Cz	8el;30%	ACz-2, RCz+2					1	R100	4.5
Fibromyalgia	F1	80	200	1	5	Cz	8el;30%	ACz-2, RCz+2					1	R100	4
Fibromyalgia	F1	80	200	1	5	Cz	8el;30%	ACz-2, RCz+2					1	R100	4
Fibromyalgia	F1	80	200	1	5	Cz	8el;30%	ACz-2, RCz+2					1	R100	3.5
Fibromyalgia	F1	80	200	1	5	Cz	8el;30%	ACz-2, RCz+2					1	R100	4
Fibromyalgia	F1	80	200	1	5	Cz	8el;30%	ACz-2, RCz+2					1	R100	3.5
Fibromyalgia	F1	80	200	1	5	Cz	8el;30%	ACz-2, RCz+2					1	R100	3.5
Fibromyalgia	F1	80	200	1	15	Cz	8el;30%	ACz-2, RCz+2					1	R100	3.5
Fibromyalgia	F1	80	200	1	5	Cz	8el;30%	ACz-2, RCz+2					1	R100	3.5
Fibromyalgia	F1	80	200	1	75	Cz	8el;30%	ACz-2, RCz+2					1	R100	3.25
Fibromyalgia	F1	80	200	1	75	Cz	8el;30%	ACz-2, RCz+2					1	R100	3.25
Fibromyalgia	F1	80	200	1	75	Cz	8el;30%	ACz-2, RCz+2					1	R100	3
Fibromyalgia	F1	80	200	1	75	Cz	8el;30%	ACz-2, RCz+2					1	R100	3
Fibromyalgia	F1	80	200	1	75	Cz	8el;30%	ACz-2, RCz+2					1	R100	3
Fibromyalgia	F1	80	200	1	75	Cz	8el;30%	ACz-2, RCz+2					1	R100	3
Fibromyalgia	F1	80	200	1	75	Cz	8el;30%	ACz-2, RCz+2	750	100		500	1	R100	2.5
Fibromyalgia	F1	80	200	1	75	Cz	8el;30%	ACz-2, RCz+2	750	100		500	1	R100	2
Fibromyalgia	F1	80	200	1	75	Cz	8el;30%	ACz-2, RCz+2	200	200		500	1	R100	2
Fibromyalgia	F1	80	200	1	75	Cz	8el;30%	ACz-2, RCz+2	200	200		500	1	R100	2
Fibromyalgia	F1	80	200	1	75	Cz	8el;30%	ACz-2, RCz+2	250	300		500	1	R100	2
Fibromyalgia	F1	80	200	1	75	Cz	8el;30%	ACz-2, RCz+2	250	300		500	1	R100	2
Fibromyalgia	F1	80	200	1	75	Cz	8el;30%	ACz-2, RCz+2	200	200		500	1	R100	2
Fibromyalgia	F1	10	200	1	5	Cz	8el;30%		750	100		500			0
Fibromyalgia	F1	20	200	1	5	Cz	8el;30%		750	100		500			0.5
Fibromyalgia	F1	30	200	1	5	Cz	8el;30%		750	100		500			1
Fibromyalgia	F1	40	200	1	5	Cz	8el;30%		750	100		500			2
Fibromyalgia	F1	50	200	1	5	Cz	8el;30%		750	100		500			3.5
Fibromyalgia	F1	60	200	1	5	Cz	8el;30%		750	100		500			4.5
Fibromyalgia	F1	60	200	1	5	Cz	8el;30%	ACz-2, RCz+2	750	100		500	1	R100	3
Fibromyalgia	F1	70	200	1	5	Cz	8el;30%	ACz-2, RCz+2	750	100		500	1	R100	4
Fibromyalgia	F1	70	200	1	5	Cz	8el;30%	ACz-2, RCz+2	750	100		500	1	R100	4
Fibromyalgia	F1	70	200	1	5	Cz	8el;30%	ACz-2, RCz+2	750	100		500	1	R100	3.5
Fibromyalgia	F1	70	200	1	5	Cz	8el;30%	ACz-2, RCz+2	750	100		500	1	R100	4.5
Fibromyalgia	F1	70	200	1	5	Cz	8el;30%	ACz-2, RCz+2	750	100		500	1	R100	4
Fibromyalgia	F1	70	200	1	5	Cz	8el;30%	ACz-2, RCz+2	750	100		500	1	R100	4
Fibromyalgia	F1	70	200	1	5	Cz	8el;30%	ACz-2, RCz+2	750	100		500	1	R100	3.5
Fibromyalgia	F1	70	200	1	5	Cz	8el;30%	ACz-2, RCz+2	750	100		500	1	R100	4
Fibromyalgia	F1	70	200	1	5	Cz	8el;30%	ACz-2, RCz+2	750	100		500	1	R100	3.5
Fibromyalgia	F1	80	200	1	5	Cz	8el;30%	ACz-2, RCz+2	750	100		500	1	R100	4
Fibromyalgia	F1	80	200	1	5	Cz	8el;30%	ACz-2, RCz+2					1	R100	3
Fibromyalgia	F1	80	200	1	15	Cz	8el;30%	ACz-2, RCz+2					1	R100	4
Fibromyalgia	F1	80	200	1	75	Cz	8el;30%	ACz-2, RCz+2					1	R100	3.5
Fibromyalgia	F1	80	200	1	75	Cz	8el;30%	ACz-2, RCz+2					1	R100	3.5
Fibromyalgia	F1	80	200	1	75	Cz	8el;30%	ACz-2, RCz+2					1	R100	3
Fibromyalgia	F1	80	200	1	75	Cz	8el;30%	ACz-2, RCz+2					1	R100	3
Fibromyalgia	F1	80	200	1	75	Cz	8el;30%	ACz-2, RCz+2					1	R100	3
Fibromyalgia	F1	80	200	1	75	Cz	8el;30%	ACz-2, RCz+2					1	R100	3
Fibromyalgia	F1	80	200	1	75	Cz	8el;30%	ACz-2, RCz+2					1	R100	3
Fibromyalgia	F1	80	200	1	75	Cz	8el;30%	ACz-2, RCz+2					1	R100	3
Fibromyalgia	F1	80	200	1	75	Cz	8el;30%	ACz-2, RCz+2					1	R100	2.5
Fibromyalgia	F1	80	200	1	75	Cz	8el;30%	ACz-2, RCz+2					1	R100	2.5
Fibromyalgia	F1	80	200	1	75	Cz	8el;30%	ACz-2, RCz+2					1	R100	2.5
Fibromyalgia	F1	80	200	1	75	Cz	8el;30%	ACz-2, RCz+2					1	R100	2.5
Fibromyalgia	F1	80	200	1	75	Cz	8el;30%	ACz-2, RCz+2					1	R100	2.5
Fibromyalgia	F1	10	200	1	5	Cz	8el;30%		250	300		500			0
Fibromyalgia	F1	20	200	1	5	Cz	8el;30%		250	300		500			0.5
Fibromyalgia	F1	30	200	1	5	Cz	8el;30%		250	300		500			1
Fibromyalgia	F1	40	200	1	5	Cz	8el;30%		250	300		500			2
Fibromyalgia	F1	50	200	1	5	Cz	8el;30%		250	300		500			3
Fibromyalgia	F1	60	200	1	5	Cz	8el;30%		250	300		500			4.1
Fibromyalgia	F1	60	200	1	5	Cz	8el;30%	ACz-2, RCz+2	250	300		500	1	R100	4
Fibromyalgia	F1	60	200	1	5	Cz	8el;30%	ACz-2, RCz+2	250	300		500	1	R100	3.25
Fibromyalgia	F1	70	200	1	5	Cz	8el;30%	ACz-2, RCz+2	250	300		500	1	R100	3.5
Fibromyalgia	F1	70	200	1	5	Cz	8el;30%	ACz-2, RCz+2	250	300		500	1	R100	3
Fibromyalgia	F1	80	200	1	5	Cz	8el;30%	ACz-2, RCz+2	250	300		500	1	R100	4
Fibromyalgia	F1	80	200	1	5	Cz	8el;30%	ACz-2, RCz+2	250	300		500	1	R100	4
Fibromyalgia	F1	80	200	1	5	Cz	8el;30%	ACz-2, RCz+2	250	300		500	1	R100	4
Fibromyalgia	F1	80	200	1	5	Cz	8el;30%	ACz-2, RCz+2	250	300		500	1	R100	4
Fibromyalgia	F1	80	200	1	5	Cz	8el;30%	ACz-2, RCz+2	250	300		500	1	R100	4
Fibromyalgia	F1	70	200	1	5	Cz	8el;30%	ACz-2, RCz+2	250	300		500	1	R100	3
Fibromyalgia	F1	80	200	1	5	Cz	8el;30%	ACz-2, RCz+2	250	300		500	1	R100	4
Fibromyalgia	F1	80	200	1	5	Cz	8el;30%	ACz-2, RCz+2					1	R100	3.5
Fibromyalgia	F1	80	200	1	5	Cz	8el;30%	ACz-2, RCz+2					1	R100	3
Fibromyalgia	F1	80	200	1	75	Cz	8el;30%	ACz-2, RCz+2					1	R100	3
Fibromyalgia	F1	80	200	1	75	Cz	8el;30%	ACz-2, RCz+2					1	R100	3
Fibromyalgia	F1	80	200	1	75	Cz	8el;30%	ACz-2, RCz+2					1	R100	2.9
Fibromyalgia	F1	80	200	1	75	Cz	8el;30%	ACz-2, RCz+2					1	R100	2.5
Fibromyalgia	F1	80	200	1	75	Cz	8el;30%	ACz-2, RCz+2					1	R100	2.5
Fibromyalgia	F1	80	200	1	75	Cz	8el;30%	ACz-2, RCz+2					1	R100	2.5
Fibromyalgia	F1	80	200	1	75	Cz	8el;30%	ACz-2, RCz+2					1	R100	2.5
Fibromyalgia	F1	80	200	1	75	Cz	8el;30%	ACz-2, RCz+2					1	R100	2
Fibromyalgia	F1	80	200	1	75	Cz	8el;30%	ACz-2, RCz+2					1	R100	2
Fibromyalgia	F1	80	200	1	75	Cz	8el;30%	ACz-2, RCz+2					1	R100	2
Fibromyalgia	F1	80	200	1	75	Cz	8el;30%	ACz-2, RCz+2					1	R100	2
Fibromyalgia	F1	80	200	1	75	Cz	8el;30%	ACz-2, RCz+2					1	R100	2
Fibromyalgia	F1	10	200	1	5	Cz	8el;30%		750	100		500			0
Fibromyalgia	F1	20	200	1	5	Cz	8el;30%		200	200		500			0.5
Fibromyalgia	F1	30	200	1	5	Cz	8el;30%		200	200		500			1
Fibromyalgia	F1	40	200	1	5	Cz	8el;30%		200	200		500			2.5
Fibromyalgia	F1	50	200	1	5	Cz	8el;30%		200	200		500			4
Fibromyalgia	F1	50	200	1	5	Cz	8el;30%	ACz-2, RCz+2	200	200		500	1	R100	2
Fibromyalgia	F1	60	200	1	5	Cz	8el;30%	ACz-2, RCz+2	200	200		500	1	R100	3
Fibromyalgia	F1	60	200	1	5	Cz	8el;30%	ACz-2, RCz+2	200	200		500	1	R100	3
Fibromyalgia	F1	70	200	1	5	Cz	8el;30%	ACz-2, RCz+2	200	200		500	1	R100	4
Fibromyalgia	F1	70	200	1	5	Cz	8el;30%	ACz-2, RCz+2	200	200		500	1	R100	3
Fibromyalgia	F1	80	200	1	5	Cz	8el;30%	ACz-2, RCz+2	200	200		500	1	R100	3
Fibromyalgia	F1	80	200	1	5	Cz	8el;30%	ACz-2, RCz+2	200	200		500	1	R100	3.5
Fibromyalgia	F1	80	200	1	5	Cz	8el;30%	RCz+2, ACz-2	200	200		500	1	R100	3.5
Fibromyalgia	F1	80	200	1	5	Cz	8el;30%	RCz+2, ACz-2	200	200		500	1	R100	3
Fibromyalgia	F1	80	200	1	5	Cz	8el;30%	RCz+2, ACz-2	200	200		500	1	R100	2.5
Fibromyalgia	F1	80	200	1	15	Cz	8el;30%	RCz+2, ACz-2	200	200		500	1	R100	2.75
Fibromyalgia	F1	80	200	1	15	Cz	8el;30%	RCz+2, ACz-2					1	R100	3
Fibromyalgia	F1	80	200	1	75	Cz	8el;30%	RCz+2, ACz-2					1	R100	2.5
Fibromyalgia	F1	80	200	1	75	Cz	8el;30%	RCz+2, ACz-2					1	R100	2.5
Fibromyalgia	F1	80	200	1	75	Cz	8el;30%	RCz+2, ACz-2					1	R100	2.5
Fibromyalgia	F1	80	200	1	75	Cz	8el;30%	RCz+2, ACz-2					1	R100	3
Fibromyalgia	F1	80	200	1	75	Cz	8el;30%	RCz+2, ACz-2					1	R100	2.5
Fibromyalgia	F1	80	200	1	75	Cz	8el;30%	RCz+2, ACz-2					1	R100	2.25
Fibromyalgia	F1	80	200	1	75	Cz	8el;30%	RCz+2, ACz-2					1	R100	2.5
Fibromyalgia	F1	80	200	1	75	Cz	8el;30%	RCz+2, ACz-2					1	R100	2
Fibromyalgia	F1	80	200	1	75	Cz	8el;30%	RCz+2, ACz-2					1	R100	2
Fibromyalgia	F1	80	200	1	75	Cz	8el;30%	RCz+2, ACz-2					1	R100	2
Fibromyalgia	F1	80	200	1	75	Cz	8el;30%	RCz+2, ACz-2					1	R100	2
Fibromyalgia	F1	80	200	1	75	Cz	8el;30%	RCz+2, ACz-2					1	R100	2
Fibromyalgia	F1	80	200	1	75	Cz	8el;30%	RCz+2, ACz-2					1	R100	2
Fibromyalgia	F1	10	200	1	5	C3+2	Cz+2		750	100		500			0
Fibromyalgia	F1	20	200	1	5	C3+2	Cz+2								1
Fibromyalgia	F1	30	200	1	5	C3+2	Cz+2								2
Fibromyalgia	F1	40	200	1	5	C3+2	Cz+2		750	100		500			3
Fibromyalgia	F1	45	200	1	5	C3+2	Cz+2		750	100		500			4
Fibromyalgia	F1	45	200	1	5	C3+2	Cz+2	AC3,RC3+4 ACz+4,RCz	750	100		500	1	R100	1
Fibromyalgia	F1	45	200	1	15	C3+2	Cz+2	AC3,RC3+4 ACz+4,RCz	750	100		500	1	R100	2.5
Fibromyalgia	F1	45	200	1	15	C3+2	Cz+2	AC3,RC3+4 ACz+4,RCz	750	100		500	1	R100	2.5
Fibromyalgia	F1	45	200	1	75	C3+2	Cz+2	AC3,RC3+4 ACz+4,RCz	750	100		500	1	R100	2.5
Fibromyalgia	F1	45	200	1	75	C3+2	Cz+2	AC3,RC3+4 ACz+4,RCz	750	100		500	1	R100	2
Fibromyalgia	F1	45	200	1	75	C3+2	Cz+2	AC3,RC3+4 ACz+4,RCz	750	100		500	1	R100	2
Fibromyalgia	F1	45	200	1	75	C3+2	Cz+2	AC3,RC3+4 ACz+4,RCz	750	100		500	1	R100	2
Fibromyalgia	F1	45	200	1	75	C3+2	Cz+2	AC3,RC3+4 ACz+4,RCz	750	100		500	1	R100	1.9
Fibromyalgia	F1	45	200	1	75	C3+2	Cz+2	AC3,RC3+4 ACz+4,RCz	750	100		500	1	R100	1.5
Fibromyalgia	F1	45	200	1	75	C3+2	Cz+2	AC3,RC3+4 ACz+4,RCz	750	100		500	1	R100	1.5
Fibromyalgia	F1	45	200	1	75	C3+2	Cz+2	AC3,RC3+4 ACz+4,RCz	750	100		500	1	R100	1.5
Fibromyalgia	F1	45	200	1	75	C3+2	Cz+2	AC3,RC3+4 ACz+4,RCz	750	100		500	1	R100	1.5
Fibromyalgia	F1	45	200	1	75	C3+2	Cz+2	AC3,RC3+4 ACz+4,RCz					1	R100	1.3
Fibromyalgia	F1	45	200	1	75	C3+2	Cz+2	AC3,RC3+4 ACz+4,RCz					1	R100	1.5
Fibromyalgia	F1	45	200	1	75	C3+2	Cz+2	AC3,RC3+4 ACz+4,RCz					1	R100	1
Fibromyalgia	F1	45	200	1	75	C3+2	Cz+2	AC3,RC3+4 ACz+4,RCz					1	R100	1
Fibromyalgia	F1	10	200	1	5	C3+2	Cz+2								0
Fibromyalgia	F1	20	200	1	5	C3+2	Cz+2		750	100		500			1
Fibromyalgia	F1	30	200	1	5	C3+2	Cz+2		750	100		500			2
Fibromyalgia	F1	40	200	1	5	C3+2	Cz+2		750	100		500			4
Fibromyalgia	F1	40	200	1	5	C3+2	Cz+2	AC3,RC3+4 ACz+4,RCz	750	100		500	1	R100	4
Fibromyalgia	F1	40	200	1	5	C3+2	Cz+2	AC3,RC3+4 ACz+4,RCz	750	100		500	1	R100	3
Fibromyalgia	F1	45	200	1	5	C3+2	Cz+2	AC3,RC3+4 ACz+4,RCz	750	100		500	1	R100	4
Fibromyalgia	F1	45	200	1	5	C3+2	Cz+2	AC3,RC3+4 ACz+4,RCz	750	100		500	1	R100	3
Fibromyalgia	F1	45	200	1	15	C3+2	Cz+2	AC3,RC3+4 ACz+4,RCz	750	100		500	1	R100	3.5
Fibromyalgia	F1	45	200	1	75	C3+2	Cz+2	AC3,RC3+4 ACz+4,RCz	750	100		500	1	R100	3.5
Fibromyalgia	F1	45	200	1	75	C3+2	Cz+2	AC3,RC3+4 ACz+4,RCz	750	100		500	1	R100	3
Fibromyalgia	F1	45	200	1	75	C3+2	Cz+2	AC3,RC3+4 ACz+4,RCz	750	100		500	1	R100	3
Fibromyalgia	F1	45	200	1	75	C3+2	Cz+2	AC3,RC3+4 ACz+4,RCz	750	100		500	1	R100	2.9
Fibromyalgia	F1	45	200	1	75	C3+2	Cz+2	AC3,RC3+4 ACz+4,RCz	750	100		500	1	R100	2.5
Fibromyalgia	F1	45	200	1	75	C3+2	Cz+2	AC3,RC3+4 ACz+4,RCz	750	100		500	1	R100	2.5
Fibromyalgia	F1	45	200	1	75	C3+2	Cz+2	AC3,RC3+4 ACz+4,RCz	750	100		500	1	R100	2
Fibromyalgia	F1	45	200	1	75	C3+2	Cz+2	AC3,RC3+4 ACz+4,RCz	750	100		500	1	R100	2
Fibromyalgia	F1	45	200	1	75	C3+2	Cz+2	AC3,RC3+4 ACz+4,RCz					1	R100	2
Fibromyalgia	F1	45	200	1	75	C3+2	Cz+2	AC3,RC3+4 ACz+4,RCz					1	R100	2
Fibromyalgia	F1	45	200	1	75	C3+2	Cz+2	AC3,RC3+4 ACz+4,RCz					1	R100	2
Fibromyalgia	F1	45	200	1	75	C3+2	Cz+2	AC3,RC3+4 ACz+4,RCz					1	R100	1.5
Fibromyalgia	F1	45	200	1	75	C3+2	Cz+2	AC3,RC3+4 ACz+4,RCz					1	R100	1.5
Fibromyalgia	F1	10	200	1	5	C3+2	Cz+2		750	100		500			0
Fibromyalgia	F1	20	200	1	5	C3+2	Cz+2		750	100		500			1
Fibromyalgia	F1	30	200	1	5	C3+2	Cz+2		750	100		500			2
Fibromyalgia	F1	40	200	1	5	C3+2	Cz+2		750	100		500			3
Fibromyalgia	F1	45	200	1	5	C3+2	Cz+2		750	100		500			3.5
Fibromyalgia	F1	45	200	1	5	C3+2	Cz+2	AC3,RC3+4 ACz+4,RCz	750	100		500	1	R100	3
Fibromyalgia	F1	45	200	1	15	C3+2	Cz+2	AC3,RC3+4 ACz+4,RCz	750	100		500	1	R100	3
Fibromyalgia	F1	45	200	1	15	C3+2	Cz+2	AC3,RC3+4 ACz+4,RCz	750	100		500	1	R100	3
Fibromyalgia	F1	45	200	1	75	C3+2	Cz+2	AC3,RC3+4 ACz+4,RCz	750	100		500	1	R100	3
Fibromyalgia	F1	45	200	1	75	C3+2	Cz+2	AC3,RC3+4 ACz+4,RCz	750	100		500	1	R100	3
Fibromyalgia	F1	45	200	1	75	C3+2	Cz+2	AC3,RC3+4 ACz+4,RCz	750	100		500	1	R100	3
Fibromyalgia	F1	45	200	1	75	C3+2	Cz+2	AC3,RC3+4 ACz+4,RCz	750	100		500	1	R100	3
Fibromyalgia	F1	45	200	1	75	C3+2	Cz+2	AC3,RC3+4 ACz+4,RCz	750	100		500	1	R100	3
Fibromyalgia	F1	45	200	1	75	C3+2	Cz+2	AC3,RC3+4 ACz+4,RCz	750	100		500	1	R100	2.5
Fibromyalgia	F1	45	200	1	75	C3+2	Cz+2	AC3,RC3+4 ACz+4,RCz	750	100		500	1	R100	2.5
Fibromyalgia	F1	45	200	1	75	C3+2	Cz+2	AC3,RC3+4 ACz+4,RCz	750	100		500	1	R100	2
Fibromyalgia	F1	45	200	1	75	C3+2	Cz+2	AC3,RC3+4 ACz+4,RCz	750	100		500	1	R100	2
Fibromyalgia	F1	45	200	1	75	C3+2	Cz+2	AC3,RC3+4 ACz+4,RCz					1	R100	1.9
Fibromyalgia	F1	45	200	1	75	C3+2	Cz+2	AC3,RC3+4 ACz+4,RCz					1	R100	1.5
Fibromyalgia	F1	45	200	1	75	C3+2	Cz+2	AC3,RC3+4 ACz+4,RCz					1	R100	1
Fibromyalgia	F1	45	200	1	75	C3+2	Cz+2	AC3,RC3+4 ACz+4,RCz					1	R100	1
Fibromyalgia	F1														2.28095
Fibromyalgia	F1	10	200	1	5	C3+2	Cz+2								0
Fibromyalgia	F1	20	200	1	5	C3+2	Cz+2		750	100		500			0.5
Fibromyalgia	F1	30	200	1	5	C3+2	Cz+2		750	100		500			1.5
Fibromyalgia	F1	40	200	1	5	C3+2	Cz+2		750	100		500			2.5
Fibromyalgia	F1	45	200	1	5	C3+2	Cz+2		750	100		500			3.5
Fibromyalgia	F1	45	200	1	5	C3+2	Cz+2	AC3,RC3+4 ACz+4,RCz	750	100		500	1	R100	1
Fibromyalgia	F1	45	200	1	15	C3+2	Cz+2	AC3,RC3+4 ACz+4,RCz	750	100		500	1	R100	2.5
Fibromyalgia	F1	45	200	1	75	C3+2	Cz+2	AC3,RC3+4 ACz+4,RCz	750	100		500	1	R100	2.5
Fibromyalgia	F1	45	200	1	75	C3+2	Cz+2	AC3,RC3+4 ACz+4,RCz	750	100		500	1	R100	2.5
Fibromyalgia	F1	45	200	1	75	C3+2	Cz+2	AC3,RC3+4 ACz+4,RCz	750	100		500	1	R100	2.5
Fibromyalgia	F1	45	200	1	75	C3+2	Cz+2	AC3,RC3+4 ACz+4,RCz	750	100		500	1	R100	2.25
Fibromyalgia	F1	45	200	1	75	C3+2	Cz+2	AC3,RC3+4 ACz+4,RCz	750	100		500	1	R100	2
Fibromyalgia	F1	45	200	1	75	C3+2	Cz+2	AC3,RC3+4 ACz+4,RCz	750	100		500	1	R100	2
Fibromyalgia	F1	45	200	1	75	C3+2	Cz+2	AC3,RC3+4 ACz+4,RCz	750	100		500	1	R100	2.5
Fibromyalgia	F1	45	200	1	75	C3+2	Cz+2	AC3,RC3+4 ACz+4,RCz	750	100		500	1	R100	2
Fibromyalgia	F1	45	200	1	75	C3+2	Cz+2	AC3,RC3+4 ACz+4,RCz	750	100		500	1	R100	1.5
Fibromyalgia	F1	45	200	1	75	C3+2	Cz+2	AC3,RC3+4 ACz+4,RCz	750	100		500	1	R100	1.5
Fibromyalgia	F1	45	200	1	75	C3+2	Cz+2	AC3,RC3+4 ACz+4,RCz					1	R100	1
Fibromyalgia	F1	45	200	1	75	C3+2	Cz+2	AC3,RC3+4 ACz+4,RCz					1	R100	1
Fibromyalgia	F1	45	200	1	75	C3+2	Cz+2	AC3,RC3+4 ACz+4,RCz					1	R100	0.75
Fibromyalgia	F2	3	500	1	5	C3+2	Cz+2								0
Fibromyalgia	F2	6	500	1	5	C3+2	Cz+2								1
Fibromyalgia	F2	9	500	1	5	C3+2	Cz+2								2
Fibromyalgia	F2	12	500	1	5	C3+2	Cz+2								2
Fibromyalgia	F2	15	500	1	5	C3+2	Cz+2								2.5
Fibromyalgia	F2	18	500	1	5	C3+2	Cz+2								2.8
Fibromyalgia	F2	21	500	1	5	C3+2	Cz+2								3
Fibromyalgia	F2	24	500	1	5	C3+2	Cz+2		750	100		500			3.5
Fibromyalgia	F2	27	500	1	15	C3+2	Cz+2		750	100		500			3.5
Fibromyalgia	F2	30	500	1	15	C3+2	Cz+2		750	100		500			4
Fibromyalgia	F2	33	500	1	15	C3+2	Cz+2		750	100		500			5
Fibromyalgia	F2	45	300	1	15	C3+2	Cz+2		750	100		500			5.2
Fibromyalgia	F2	40	300	1	15	C3+2	Cz+2		750	100		500			5.2
Fibromyalgia	F2	45	200	1	15	C3+2	Cz+2		750	100		500			4
Fibromyalgia	F2	50	200	1	15	C3+2	Cz+2		750	100		500			3.5
Fibromyalgia	F2	55	200	1	15	C3+2	Cz+2		750	100		500			3
Fibromyalgia	F2	60	200	1	15	C3+2	Cz+2		750	100		500			4
Fibromyalgia	F2	58	200	1	15	C3+2	Cz+2		750	100		500			3
Fibromyalgia	F2	0			5	C3+2	Cz+2	AC3,RC3+4 ACz+4,RCz	750	100		500	0.5	R100	0
Fibromyalgia	F2	60	200	1	5	C3+2	Cz+2	AC3,RC3+4 ACz+4,RCz	750	100		500	0.5	R100	2.5
Fibromyalgia	F2	60	200	1	10	C3+2	Cz+2	AC3,RC3+4 ACz+4,RCz	750	100		500	0.85	R100	3.5
Fibromyalgia	F2	60	200	1	10	C3+2	Cz+2	AC3,RC3+4 ACz+4,RCz	750	100		500	1	R100	3.3
Fibromyalgia	F2	60	200	1	10	C3+2	Cz+2	AC3,RC3+4 ACz+4,RCz					0.5	R0	3.1
Fibromyalgia	F2	60	200	1	10	C3+2	Cz+2	AC3,RC3+4 ACz+4,RCz					0.85	R0	3.06
Fibromyalgia	F2	60	200	1	10	C3+2	Cz+2	AC3,RC3+4 ACz+4,RCz					1	R0	2.8
Fibromyalgia	F2	60	200	1	10	C3+2	Cz+2	AC3,RC3+4 ACz+4,RCz					0.5	R100	3
Fibromyalgia	F2	60	200	1	10	C3+2	Cz+2	AC3,RC3+4 ACz+4,RCz					0.85	R100	2.8
Fibromyalgia	F2	60	200	1	10	C3+2	Cz+2	AC3,RC3+4 ACz+4,RCz					1	R100	3.1
Fibromyalgia	F2	60	200	1	10	C3+2	Cz+2	AC3,RC3+4 ACz+4,RCz					0.5	R100	2.6
Fibromyalgia	F2	60	200	1	10	C3+2	Cz+2	AC3,RC3+4 ACz+4,RCz					0.5	R100	2.3
Fibromyalgia	F2	60	200	1	10	C3+2	Cz+2	AC3,RC3+4 ACz+4,RCz					0.5	R100	2.1
Fibromyalgia	F2	60	200	1	10	C3+2	Cz+2	AC3,RC3+4 ACz+4,RCz					0.5	R100	2
Fibromyalgia	F2	60	200	1	10	C3+2	Cz+2	AC3,RC3+4 ACz+4,RCz					0.5	R100	2.2
Fibromyalgia	F2	60	200	1	10	C3+2	Cz+2	AC3,RC3+4 ACz+4,RCz					0.5	R100	2
Fibromyalgia	F2	60	200	1	10	C3+2	Cz+2	AC3,RC3+4 ACz+4,RCz					0.5	R100	1.9
Fibromyalgia	F2	60	200	1	10	C3+2	Cz+2	AC3,RC3+4 ACz+4,RCz					0.5	R100	1.9
Fibromyalgia	F2	60	200	1	10	C3+2	Cz+2	AC3,RC3+4 ACz+4,RCz					0.5	R100	1.5
Fibromyalgia	F2	60	200	1	10	C3+2	Cz+2	AC3,RC3+4 ACz+4,RCz					0.5	R100	1.5
Fibromyalgia	F2	60	200	1	10	C3+2	Cz+2	AC3,RC3+4 ACz+4,RCz					0.5	R100	1.5
Fibromyalgia	F2	60	200	1	10	C3+2	Cz+2	AC3,RC3+4 ACz+4,RCz					0.5	R100	4
Fibromyalgia	F2	5	200	1	5	Cz	8el;30%	ACz-2, RCz+2							0
Fibromyalgia	F2	10	200	1	5	Cz	8el;30%	ACz-2, RCz+2							0
Fibromyalgia	F2	20	200	1	5	Cz	8el;30%	ACz-2, RCz+2							1
Fibromyalgia	F2	30	200	1	5	Cz	8el;30%	ACz-2, RCz+2							1.5
Fibromyalgia	F2	40	200	1	5	Cz	8el;30%	ACz-2, RCz+2	250	100		500			2
Fibromyalgia	F2	50	200	1	5	Cz	8el;30%	ACz-2, RCz+2	250	100		500			3
Fibromyalgia	F2	60	200	1	5	Cz	8el;30%	ACz-2, RCz+2	250	100		500			4
Fibromyalgia	F2	70	200	1	15	Cz	8el;30%	ACz-2, RCz+2	250	100		500			4.5
Fibromyalgia	F2	70	200	1	5	Cz	8el;30%	ACz-2, RCz+2	250	100		500	0.5	R100	4.5
Fibromyalgia	F2	70	200	1	5	Cz	8el;30%	ACz-2, RCz+2	250	100		500	0.5	R100	4
Fibromyalgia	F2	70	200	1	5	Cz	8el;30%	ACz-2, RCz+2	250	100		500	0.5	R100	3.8
Fibromyalgia	F2	80	200	1	5	Cz	8el;30%	ACz-2, RCz+2	250	300		500	0.5	R100	3.5
Fibromyalgia	F2	80	200	1	15	Cz	8el;30%	ACz-2, RCz+2	250	300		500	0.5	R100	4
Fibromyalgia	F2	90	200	1	15	Cz	8el;30%	ACz-2, RCz+2	250	300		500	0.5	R100	4.5
Fibromyalgia	F2	90	200	1	15	Cz	8el;30%	ACz-2, RCz+2	250	100		500	1	R100	4
Fibromyalgia	F2	90	200	1	5	Cz	8el;30%	ACz-2, RCz+2	250	100		500	1	R100	4
Fibromyalgia	F2	90	200	1	5	Cz	8el;30%	ACz-2, RCz+2	500	100		500	1	R100	3
Fibromyalgia	F2	95	200	1	15	Cz	8el;30%	ACz-2, RCz+2	500	100		500	1	R100	3.8
Fibromyalgia	F2	105	200	0.33	15	Cz	8el;30%	ACz-2, RCz+2	750	100		500	1	R100	3.3
Fibromyalgia	F2	100	200	0.33	15	Cz	8el;30%	ACz-2, RCz+2	750	100		500	1	R100	3
Fibromyalgia	F2	95	200	0.33	15	Cz	8el;30%	ACz-2, RCz+2	750	300		500	1	R100	3.2
Fibromyalgia	F2	90	200	0.5	15	Cz	8el;30%	ACz-2, RCz+2	750	500		500	1	R100	3.3
Fibromyalgia	F2	95	200	1	15	Cz	8el;30%	ACz-2, RCz+2	250	100		500	1	R100	3.5
Fibromyalgia	F2	95	200	1	5	Cz	8el;30%	ACz-2, RCz+2	250	100		500	0.5	R0	3.5
Fibromyalgia	F2	95	200	1	5	Cz	8el;30%	ACz-2, RCz+2					0.5	R0	3.3
Fibromyalgia	F2	95	200	1	5	Cz	8el;30%	ACz-2, RCz+2					0.5	R0	3
Fibromyalgia	F2	95	200	1	5	Cz	8el;30%	ACz-2, RCz+2					1	R0	2.8
Fibromyalgia	F2	10	200	1	5	C3+4	Cz+4								0
Fibromyalgia	F2	20	200	1	1	C3+4	Cz+4								1
Fibromyalgia	F2	30	200	1	5	C3+4	Cz+4								1.5
Fibromyalgia	F2	40	200	1	5	C3+4	Cz+4		250	100		500			2
Fibromyalgia	F2	50	200	1	5	C3+4	Cz+4		750	300		500			2.5
Fibromyalgia	F2	55	200	1	15	C3+4	Cz+4		750	500		500			3
Fibromyalgia	F2	60	200	1	15	C3+4	Cz+4		750	500		500			3
Fibromyalgia	F2	65	200	1	15	C3+4	Cz+4		750	500		500			3
Fibromyalgia	F2	70	200	1	15	C3+4	Cz+4		750	500		500			4
Fibromyalgia	F2	60	200	1	15	C3+2	Cz+2		750	500		500			3
Fibromyalgia	F2	65	200	1	15	C3+2	Cz+2		250	500		500			3
Fibromyalgia	F2	65	200	1	15	C3+2	Cz+2		500	500		500			3
Fibromyalgia	F2	65	200	1	15	C3+2	Cz+2		500	500		500			3
Fibromyalgia	F2	60	200	1	15	C3+2	Cz+2		500	500		500			2.5
Fibromyalgia	F2	60	200	1	15	C3+2	Cz+2		500	500		500			2
Fibromyalgia	F2	60	200	1	15	C3+2	Cz+2		500	500		500			2
Fibromyalgia	F2	65	200	1	15	C3+2	Cz+2		500	500		500			2
Fibromyalgia	F2	65	200	1	15	C3+2	Cz+2		500	500		500			2
Fibromyalgia	F2	65	200	1	15	C3+2	Cz+2		500	500		500			2
Fibromyalgia	F2	65	200	1	15	C3+2	Cz+2		500	500		500			2
Fibromyalgia	F2	70	200	1	15	C3+2	Cz+2		500	500		500			2
Fibromyalgia	F2	70	200	1	15	C3+2	Cz+2		500	500		500			2
Fibromyalgia	F2	70	200	1	15	C3+2	Cz+2		750	500		500			2
Fibromyalgia	F2	70	200	1	15	C3+2	Cz+2		750	500		500			2
Fibromyalgia	F2	70	200	1	15	C3+4	Cz+4								2
Fibromyalgia	F2	70	200	1	15	Cz+3	C3+3								2.3
Fibromyalgia	F2	70	200	1	15	Cz(+3, -1)	C3(+3, -1)								2
Fibromyalgia	F2	70	200	1	15	Cz(+3, -1)	C3(+3, -1)								2
Fibromyalgia	F2	70	200	1	15	C3(+3, -1)	Cz(+3, -1)								2
Fibromyalgia	F2	65	200	1	15	C3(+3, -1)	Cz(+3, -1)								2
Fibromyalgia	F2	60	200	1	15	C3(+3, -1)	Cz(+3, -1)								1.5
Fibromyalgia	F2	60	200	1	15	C3(+4 -1)	Cz(+4, -1)								1.5
Fibromyalgia	F2	65	200	1	15	C3(+4 -1)	Cz(+4, -1)								1.5
Fibromyalgia	F2	60	200	1	15	C3+3	Cz+3								2
Fibromyalgia	F2	65	200	1	15	C3+3	Cz+3								2
Fibromyalgia	F2	70	200	1	15	C3+3	Cz+3								2
Fibromyalgia	F2	10	200	1	5	C3+2	Cz+2								0
Fibromyalgia	F2	20	200	1	5	C3+2	Cz+2								1
Fibromyalgia	F2	30	200	1	5	C3+2	Cz+2								1
Fibromyalgia	F2	40	200	1	5	C3+2	Cz+2								1.5
Fibromyalgia	F2	50	200	1	5	C3+2	Cz+2								1.5
Fibromyalgia	F2	60	200	1	15	C3+2	Cz+2								2
Fibromyalgia	F2	57	200	1	15	C3+2	Cz+2								2.5
Fibromyalgia	F2	60	200	1	75	C3+2	Cz+2								3
Fibromyalgia	F2	60	200	1	75	C3+2	Cz+2								2.5
Fibromyalgia	F2	60	200	1	75	C3+2	Cz+2								2
Fibromyalgia	F2	60	200	1	75	C3+2	Cz+2								2
Fibromyalgia	F2	60	200	1	75	C3+2	Cz+2								2
Fibromyalgia	F2	60	200	1	75	C3+2	Cz+2								2
Fibromyalgia	F2	60	200	1	75	C3+2	Cz+2								2
Fibromyalgia	F2	60	200	1	75	C3+2	Cz+2								2
Fibromyalgia	F2	60	200	1	75	C3+2	Cz+2								2
Fibromyalgia	F2	60	200	1	75	C3+2	Cz+2								1.5
Fibromyalgia	F2	60	200	1	75	C3+2	Cz+2								1.5
Fibromyalgia	F2	60	200	1	75	C3+2	Cz+2								1.5
Fibromyalgia	F2	10	200	1	5	C3+2	Cz+2								0
Fibromyalgia	F2	20	200	1	5	C3+2	Cz+2								0.5
Fibromyalgia	F2	30	200	1	5	C3+2	Cz+2								1
Fibromyalgia	F2	40	200	1	5	C3+2	Cz+2								1.5
Fibromyalgia	F2	50	200	1	5	C3+2	Cz+2								2
Fibromyalgia	F2	60	200	1	15	C3+2	Cz+2								1.8
Fibromyalgia	F2	65	200	1	15	C3+2	Cz+2								2
Fibromyalgia	F2	70	200	1	15	C3+2	Cz+2								2.5
Fibromyalgia	F2	70	200	1	5	C3+2	Cz+2	AC3,RC3+4 ACz+4,RCz					0.5	R100	1.5
Fibromyalgia	F2	70	200	1	5	C3+2	Cz+2	AC3,RC3+4 ACz+4,RCz					0.5	R100	2
Fibromyalgia	F2	70	200	1	5	C3+2	Cz+2	AC3,RC3+4 ACz+4,RCz					1	R100	1.5
Fibromyalgia	F2	70	200	1	75	C3+2	Cz+2								2
Fibromyalgia	F2	70	200	1	75	C3+2	Cz+2								1.5
Fibromyalgia	F2	70	200	1	75	C3+2	Cz+2								1.3
Fibromyalgia	F2	70	200	1	75	C3+2	Cz+2								1.15
Fibromyalgia	F2	70	200	1	75	C3+2	Cz+2								1.2
Fibromyalgia	F2	70	200	1	75	C3+2	Cz+2								1.1
Fibromyalgia	F2	70	200	1	75	C3+2	Cz+2								1.3
Fibromyalgia	F2	70	200	1	75	C3+2	Cz+2								1.2
Fibromyalgia	F2	70	200	1	75	C3+2	Cz+2								1.3
Fibromyalgia	F2	70	200	1	75	C3+2	Cz+2								1.15
Fibromyalgia	F2	70	200	1	75	C3+2	Cz+2								1.1
Fibromyalgia	F2	70	200	1	75	C3+2	Cz+2								1.1
Fibromyalgia	F2	70	200	1	75	C3+2	Cz+2								1.15
Fibromyalgia	F2	10	200	1	5	C3+2	Cz+2								0
Fibromyalgia	F2	20	200	1	5	C3+2	Cz+2								0.5
Fibromyalgia	F2	30	200	1	5	C3+2	Cz+2								1
Fibromyalgia	F2	40	200	1	5	C3+2	Cz+2								1.5
Fibromyalgia	F2	50	200	1	5	C3+2	Cz+2		750/200	500		500			2
Fibromyalgia	F2	60	200	1	15	C3+2	Cz+2		250	100		500			2
Fibromyalgia	F2	70	200	1	15	C3+2	Cz+2		500	500		500			2.5
Fibromyalgia	F2	70	200	1	75	C3+2	Cz+2		500	500		500			2.5
Fibromyalgia	F2	70	200	1	75	C3+2	Cz+2								2.5
Fibromyalgia	F2	70	200	1	75	C3+2	Cz+2								2.2
Fibromyalgia	F2	70	200	1	75	C3+2	Cz+2								2.1
Fibromyalgia	F2	70	200	1	75	C3+2	Cz+2								2.1
Fibromyalgia	F2	70	200	1	75	C3+2	Cz+2								2
Fibromyalgia	F2	70	200	1	75	C3+2	Cz+2								2
Fibromyalgia	F2	70	200	1	75	C3+2	Cz+2								2
Fibromyalgia	F2	70	200	1	75	C3+2	Cz+2								1.9
Fibromyalgia	F2	70	200	1	75	C3+2	Cz+2								1.8
Fibromyalgia	F2	70	200	1	75	C3+2	Cz+2								1.7
Fibromyalgia	F2	70	200	1	75	C3+2	Cz+2								1.5
Fibromyalgia	F2	70	200	1	75	C3+2	Cz+2								1.7
Fibromyalgia	F2	70	200	1	75	C3+2	Cz+2								1.7
Fibromyalgia	F2	10	300	1	5	C3+2	Cz+2								0.5
Fibromyalgia	F2	30	300	1	5	C3+2	Cz+2								1
Fibromyalgia	F2	50	300	1	5	C3+2	Cz+2								2
Fibromyalgia	F2	70	300	1	15	C3+2	Cz+2								3
Fibromyalgia	F2	65	300	1	15	C3+2	Cz+2								3
Fibromyalgia	F2	70	200	1	75	C3+2	Cz+2								2.5
Fibromyalgia	F2	70	200	1	75	C3+2	Cz+2								2.3
Fibromyalgia	F2	70	200	1	75	C3+2	Cz+2								2
Fibromyalgia	F2	70	200	1	75	C3+2	Cz+2								1.8
Fibromyalgia	F2	70	200	1	75	C3+2	Cz+2								1.6
Fibromyalgia	F2	70	200	1	75	C3+2	Cz+2								1.8
Fibromyalgia	F2	70	200	1	75	C3+2	Cz+2								1.7
Fibromyalgia	F2	70	200	1	75	C3+2	Cz+2								1.8
Fibromyalgia	F2	70	200	1	75	C3+2	Cz+2								1.7
Fibromyalgia	F2	70	200	1	75	C3+2	Cz+2								1.7
Fibromyalgia	F2	70	200	1	75	C3+2	Cz+2								1.6
Fibromyalgia	F2	70	200	1	75	C3+2	Cz+2								1.8
Fibromyalgia	F2	70	200	1	75	C3+2	Cz+2								1.7
Fibromyalgia	F2	10	200	1	5	C3+2	Cz+2								0
Fibromyalgia	F2	30	200	1	5	C3+2	Cz+2								1
Fibromyalgia	F2	50	200	1	5	C3+2	Cz+2								1.5
Fibromyalgia	F2	70	200	1	15	C3+2	Cz+2								2
Fibromyalgia	F2	70	200	1	75	C3+2	Cz+2								2.3
Fibromyalgia	F2	70	200	1	75	C3+2	Cz+2								2.3
Fibromyalgia	F2	70	200	1	75	C3+2	Cz+2								2
Fibromyalgia	F2	70	200	1	75	C3+2	Cz+2								2.2
Fibromyalgia	F2	70	200	1	75	C3+2	Cz+2								2
Fibromyalgia	F2	70	200	1	75	C3+2	Cz+2								2
Fibromyalgia	F2	70	200	1	75	C3+2	Cz+2								1.8
Fibromyalgia	F2	70	200	1	75	C3+2	Cz+2								1.8
Fibromyalgia	F2	70	200	1	75	C3+2	Cz+2								1.7
Fibromyalgia	F2	70	200	1	75	C3+2	Cz+2								1.5
Fibromyalgia	F2	70	200	1	75	C3+2	Cz+2								1.5
Fibromyalgia	F2	70	200	1	75	C3+2	Cz+2								1.7
Fibromyalgia	F2	70	200	1	75	C3+2	Cz+2								1.7
Fibromyalgia	F2	70	200	1	75	C3+2	Cz+2								1.7
Fibromyalgia	F2	10	200	1	5	Cz	8el;30%								0
Fibromyalgia	F2	30	200	1	5	Cz	8el;30%								0.5
Fibromyalgia	F2	50	200	1	5	Cz	8el;30%								1
Fibromyalgia	F2	70	200	1	5	Cz	8el;30%								2
Fibromyalgia	F2	80	200	1	5	Cz	8el;30%								2.5
Fibromyalgia	F2	80	200	1	5	Cz	8el;30%	ACz-2, RCz+2					1	R0	2.8
Fibromyalgia	F2	80	200	1	5	Cz	8el;30%	ACz-2, RCz+2					0.5	R100	1.5
Fibromyalgia	F2	90	200	1	15	Cz	8el;30%	ACz-2, RCz+2					0.5	R100	2
Fibromyalgia	F2	95	200	1	15	Cz	8el;30%	ACz-2, RCz+2					0.5	R100	2.3
Fibromyalgia	F2	95	200	1	15	Cz	8el;30%	ACz-2, RCz+2					0.5	R100	2
Fibromyalgia	F2	95	200	1	75	Cz	8el;30%	ACz-2, RCz+2					0.5	R100	2.3
Fibromyalgia	F2	95	200	1	75	Cz	8el;30%	ACz-2, RCz+2					0.5	R100	2.5
Fibromyalgia	F2	95	200	1	75	Cz	8el;30%	ACz-2, RCz+2					0.5	R100	2
Fibromyalgia	F2	95	200	1	75	Cz	8el;30%	ACz-2, RCz+2					0.5	R100	2
Fibromyalgia	F2	95	200	1	75	Cz	8el;30%	ACz-2, RCz+2					0.5	R100	2
Fibromyalgia	F2	95	200	1	75	Cz	8el;30%	ACz-2, RCz+2					0.5	R100	2
Fibromyalgia	F2	95	200	1	75	Cz	8el;30%	ACz-2, RCz+2					0.5	R100	2
Fibromyalgia	F2	95	200	1	75	Cz	8el;30%	ACz-2, RCz+2					0.5	R100	1.8
Fibromyalgia	F2	95	200	1	75	Cz	8el;30%	ACz-2, RCz+2					0.5	R100	1.6
Fibromyalgia	F2	95	200	1	75	Cz	8el;30%	ACz-2, RCz+2					0.5	R100	1.8
Fibromyalgia	F2	95	200	1	75	Cz	8el;30%	ACz-2, RCz+2					0.5	R100	1.7
Fibromyalgia	F2	95	200	1	75	Cz	8el;30%	ACz-2, RCz+2					0.5	R100	1.6
Fibromyalgia	F2	95	200	1	75	Cz	8el;30%	ACz-2, RCz+2					0.5	R100	1.7
Fibromyalgia	F2	10	200	1	5	Cz	8el;30%								0
Fibromyalgia	F2	30	200	1	5	Cz	8el;30%								0.5
Fibromyalgia	F2	50	200	1	5	Cz	8el;30%								1
Fibromyalgia	F2	70	200	1	5	Cz	8el;30%		750	500		500			1.5
Fibromyalgia	F2	80	200	1	15	Cz	8el;30%		250	100		500			2
Fibromyalgia	F2	95	200	1	15	Cz	8el;30%		250	100		500			2.3
Fibromyalgia	F2	95	200	1	15	Cz	8el;30%		250	100		500			2.5
Fibromyalgia	F2	95	200	1	15	Cz	8el;30%		250	100		500			2.5
Fibromyalgia	F2	100	200	1	15	Cz	8el;30%		250	100		500			2.5
Fibromyalgia	F2	100	200	1	75	Cz	8el;30%		250	100		500			2.5
Fibromyalgia	F2	100	200	1	75	Cz	8el;30%		250	100		500			2.3
Fibromyalgia	F2	100	200	1	75	Cz	8el;30%		250	100		500			2
Fibromyalgia	F2	100	200	1	75	Cz	8el;30%		250	100		500			2
Fibromyalgia	F2	100	200	1	75	Cz	8el;30%		250	100		500			1.8
Fibromyalgia	F2	100	200	1	75	Cz	8el;30%		250	100		500			1.8
Fibromyalgia	F2	100	200	1	75	Cz	8el;30%		250	100		500			1.7
Fibromyalgia	F2	100	200	1	75	Cz	8el;30%		250	100		500			1.8
Fibromyalgia	F2	100	200	1	75	Cz	8el;30%		250	100		500			1.8
Fibromyalgia	F2	100	200	1	75	Cz	8el;30%		250	100		500			2
Fibromyalgia	F2	100	200	1	75	Cz	8el;30%		250	100		500			1.9
Fibromyalgia	F2	100	200	1	75	Cz	8el;30%		250	100		500			2
Fibromyalgia	F2	100	200	1	75	Cz	8el;30%								1.8
Fibromyalgia	F2	100	200	1	75	Cz	8el;30%								2
Fibromyalgia	F2	10	200	1	5	Cz	8el;30%								0
Fibromyalgia	F2	30	200	1	5	Cz	8el;30%								0.5
Fibromyalgia	F2	50	200	1	5	Cz	8el;30%								1
Fibromyalgia	F2	70	200	1	5	Cz	8el;30%								2
Fibromyalgia	F2	80	200	1	5	Cz	8el;30%	ACz-2, RCz+2					0.5	R100	2
Fibromyalgia	F2	95	200	1	15	Cz	8el;30%	ACz-2, RCz+2					0.5	R100	2.5
Fibromyalgia	F2	90	200	1	15	Cz	8el;30%	ACz-2, RCz+2					0.5	R100	2.5
Fibromyalgia	F2	90	200	1	75	Cz	8el;30%	ACz-2, RCz+2					0.5	R100	2
Fibromyalgia	F2	90	200	1	75	Cz	8el;30%	ACz-2, RCz+2					0.5	R100	2
Fibromyalgia	F2	90	200	1	75	Cz	8el;30%	ACz-2, RCz+2					0.5	R100	1.8
Fibromyalgia	F2	90	200	1	75	Cz	8el;30%	ACz-2, RCz+2					0.5	R100	1.6
Fibromyalgia	F2	90	200	1	75	Cz	8el;30%	ACz-2, RCz+2					0.5	R100	1.8
Fibromyalgia	F2	90	200	1	75	Cz	8el;30%	ACz-2, RCz+2					0.5	R100	1.8
Fibromyalgia	F2	90	200	1	75	Cz	8el;30%	ACz-2, RCz+2					0.5	R100	1.8
Fibromyalgia	F2	90	200	1	75	Cz	8el;30%	ACz-2, RCz+2					0.5	R100	1.7
Fibromyalgia	F2	90	200	1	75	Cz	8el;30%	ACz-2, RCz+2					0.5	R100	1.8
Fibromyalgia	F2	90	200	1	75	Cz	8el;30%	ACz-2, RCz+2					0.5	R100	1.7
Fibromyalgia	F2	90	200	1	75	Cz	8el;30%	ACz-2, RCz+2					0.5	R100	1.8
Fibromyalgia	F2	90	200	1	75	Cz	8el;30%	ACz-2, RCz+2					0.5	R100	1.8
Fibromyalgia	F2	90	200	1	75	Cz	8el;30%	ACz-2, RCz+2					0.5	R100	1.7
Fibromyalgia	F2	10	200	1	5	Cz	8el;30%								0
Fibromyalgia	F2	30	200	1	5	Cz	8el;30%								0.5
Fibromyalgia	F2	50	200	1	5	Cz	8el;30%								1
Fibromyalgia	F2	70	200	1	5	Cz	8el;30%								1.5
Fibromyalgia	F2	70	200	1	5	Cz	8el;30%	ACz-2, RCz+2					0.5	R180	1.5
Fibromyalgia	F2	90	200	1	5	Cz	8el;30%	ACz-2, RCz+2	250	100		500	0.5	R180	2.3
Fibromyalgia	F2	90	200	1	5	Cz	8el;30%	ACz-2, RCz+2	250	100		500	0.5	R180	2.3
Fibromyalgia	F2	90	200	1	15	Cz	8el;30%	ACz-2, RCz+2	250	100		500	0.5	R180	2.3
Fibromyalgia	F2	95	200	1	15	Cz	8el;30%	ACz-2, RCz+2	250	100		500	0.5	R180	2.5
Fibromyalgia	F2	95	200	1	15	Cz	8el;30%	ACz-2, RCz+2	250	100		500	0.5	R180	2.5
Fibromyalgia	F2	95	200	1	75	Cz	8el;30%	ACz-2, RCz+2	250	100		500	0.5	R100	2
Fibromyalgia	F2	95	200	1	75	Cz	8el;30%	ACz-2, RCz+2	250	100		500	0.5	R100	2.3
Fibromyalgia	F2	95	200	1	75	Cz	8el;30%	ACz-2, RCz+2	250	100		500	0.5	R100	2.3
Fibromyalgia	F2	95	200	1	75	Cz	8el;30%	ACz-2, RCz+2	250	100		500	0.5	R100	2
Fibromyalgia	F2	95	200	1	75	Cz	8el;30%	ACz-2, RCz+2	250	100		500	0.5	R100	2
Fibromyalgia	F2	95	200	1	75	Cz	8el;30%	ACz-2, RCz+2	250	100		500	0.5	R100	1.9
Fibromyalgia	F2	95	200	1	75	Cz	8el;30%	ACz-2, RCz+2	250	100		500	0.5	R100	1.9
Fibromyalgia	F2	95	200	1	75	Cz	8el;30%	ACz-2, RCz+2	250	100		500	0.5	R100	1.7
Fibromyalgia	F2	95	200	1	75	Cz	8el;30%	ACz-2, RCz+2	250	100		500	0.5	R100	1.8
Fibromyalgia	F2	95	200	1	75	Cz	8el;30%	ACz-2, RCz+2	250	100		500	0.5	R100	1.8
Fibromyalgia	F2	95	200	1	75	Cz	8el;30%	ACz-2, RCz+2					0.5	R100	2
Fibromyalgia	F2	95	200	1	75	Cz	8el;30%	ACz-2, RCz+2					0.5	R100	1.7
Fibromyalgia	F2	95	200	1	75	Cz	8el;30%	ACz-2, RCz+2					0.5	R100	1.8
Fibromyalgia	F2	10	200		1	Cz	8el;30%								0
Fibromyalgia	F2	30	200		5	Cz	8el;30%		250	100		500			0.5
Fibromyalgia	F2	50	200		5	Cz	8el;30%		250	100		500			0.8
Fibromyalgia	F2	70	200		5	Cz	8el;30%		250	100		500			1
Fibromyalgia	F2	80	200		5	Cz	8el;30%		250	100		500			1.5
Fibromyalgia	F2	90	200		5	Cz	8el;30%		250	100		500			2
Fibromyalgia	F2	90	200	1	5	Cz	8el;30%	ACz-2, RCz+2	250	100		500	0.5	R100	2
Fibromyalgia	F2	95	200	1	15	Cz	8el;30%	ACz-2, RCz+2	250	100		500	0.5	R100	2.3
Fibromyalgia	F2	90	200	1	15	Cz	8el;30%	ACz-2, RCz+2	250	100		500	0.5	R100	2.5
Fibromyalgia	F2	90	200	1	75	Cz	8el;30%	ACz-2, RCz+2	250	100		500	0.5	R100	2
Fibromyalgia	F2	90	200	1	75	Cz	8el;30%	ACz-2, RCz+2	250	100		500	0.5	R100	2
Fibromyalgia	F2	90	200	1	75	Cz	8el;30%	ACz-2, RCz+2	250	100		500	0.5	R100	1.8
Fibromyalgia	F2	90	200	1	75	Cz	8el;30%	ACz-2, RCz+2	250	100		500	0.5	R100	1.8
Fibromyalgia	F2	90	200	1	75	Cz	8el;30%	ACz-2, RCz+2	250	100		500	0.5	R100	1.7
Fibromyalgia	F2	90	200	1	75	Cz	8el;30%	ACz-2, RCz+2	250	100		500	0.5	R100	1.8
Fibromyalgia	F2	90	200	1	75	Cz	8el;30%	ACz-2, RCz+2	250	100		500	0.5	R100	1.8
Fibromyalgia	F2	90	200	1	75	Cz	8el;30%	ACz-2, RCz+2	250	100		500	0.5	R100	1.7
Fibromyalgia	F2	90	200	1	75	Cz	8el;30%	ACz-2, RCz+2	250	100		500	0.5	R100	1.6
Fibromyalgia	F2	90	200	1	75	Cz	8el;30%	ACz-2, RCz+2	250	100		500	0.5	R100	1.5
Fibromyalgia	F2	90	200	1	75	Cz	8el;30%	ACz-2, RCz+2	250	100		500	0.5	R100	1.7
Fibromyalgia	F2	90	200	1	75	Cz	8el;30%	ACz-2, RCz+2	250	100		500	0.5	R100	1.8
Fibromyalgia	F2	90	200	1	75	Cz	8el;30%	ACz-2, RCz+2					0.5	R100	1.7
Fibromyalgia	F2	10	200	1	5	C3+2	Cz+2								0
Fibromyalgia	F2	30	200	1	5	C3+2	Cz+2								0.5
Fibromyalgia	F2	50	200	1	5	C3+2	Cz+2		250	100		500			1
Fibromyalgia	F2	70	200	1	5	C3+2	Cz+2		250	100		500			1.5
Fibromyalgia	F2	70	200	1	5	C3+2	Cz+2	AC3,RC3+4 ACz+4,RCz	250	100		500	0.5	R100	1.7
Fibromyalgia	F2	70	200	1	5	C3+2	Cz+2	AC3,RC3+4 ACz+4,RCz	250	100		500	0.5	R100	1.7
Fibromyalgia	F2	80	200	1	5	C3+2	Cz+2	AC3,RC3+4 ACz+4,RCz	250	100		500	0.5	R100	1.8
Fibromyalgia	F2	80	200	1	5	C3+2	Cz+2	AC3,RC3+4 ACz+4,RCz	250	100		500	0.5	R0	1.8
Fibromyalgia	F2	90	200	1	5	C3+2	Cz+2	AC3,RC3+4 ACz+4,RCz	250	100		500	0.5	R0	1.8
Fibromyalgia	F2	90	200	1	5	C3+2	Cz+2	AC3,RC3+4 ACz+4,RCz	250	100		500	0.5	R0	1.8
Fibromyalgia	F2	90	200	1	15	C3+2	Cz+2	AC3,RC3+4 ACz+4,RCz	250	100		500	0.5	R0	2
Fibromyalgia	F2	80	200	1	15	C3+2	Cz+2	AC3,RC3+4 ACz+4,RCz	250	100		500	0.5	R0	1.8
Fibromyalgia	F2	75	200	1	15	C3+2	Cz+2	AC3,RC3+4 ACz+4,RCz	250	100		500	0.5	R0	1.7
Fibromyalgia	F2	70	200	1	15	C3+2	Cz+2	AC3,RC3+4 ACz+4,RCz	250	100		500	0.5	R0	1.6
Fibromyalgia	F2	65	200	1	15	C3+2	Cz+2	AC3,RC3+4 ACz+4,RCz	250	100		500	0.5	R0	1.56
Fibromyalgia	F2	65	200	1	15	C3+2	Cz+2	AC3,RC3+4 ACz+4,RCz	250	100		500	0.5	R0	1.6
Fibromyalgia	F2	55	200	1	15	C3+2	Cz+2	AC3,RC3+4 ACz+4,RCz	250	100		500	0.5	R0	1.5
Fibromyalgia	F2	75	200	1	15	C3+2	Cz+2	AC3,RC3+4 ACz+4,RCz	250	100		500	0.5	R0	1.8
Fibromyalgia	F2	75	200	1	75	C3+2	Cz+2	AC3,RC3+4 ACz+4,RCz					0.5	R0	1.7
Fibromyalgia	F2	75	200	1	75	C3+2	Cz+2	AC3,RC3+4 ACz+4,RCz					0.5	R0	1.6
Fibromyalgia	F2	75	200	1	75	C3+2	Cz+2	AC3,RC3+4 ACz+4,RCz					0.5	R0	1.6
Fibromyalgia	F2	75	200	1	75	C3+2	Cz+2	AC3,RC3+4 ACz+4,RCz					0.5	R0	1.55
Fibromyalgia	F2	75	200	1	75	C3+2	Cz+2	AC3,RC3+4 ACz+4,RCz					0.5	R0	1.7
Fibromyalgia	F2	75	200	1	75	C3+2	Cz+2	AC3,RC3+4 ACz+4,RCz					0.5	R0	1.7
Fibromyalgia	F2	75	200	1	75	C3+2	Cz+2	AC3,RC3+4 ACz+4,RCz					0.5	R0	1.6
Fibromyalgia	F2	75	200	1	75	C3+2	Cz+2	AC3,RC3+4 ACz+4,RCz					0.5	R0	1.6
Fibromyalgia	F2	75	200	1	75	C3+2	Cz+2	AC3,RC3+4 ACz+4,RCz					0.5	R0	1.7
Fibromyalgia	F2	75	200	1	75	C3+2	Cz+2	AC3,RC3+4 ACz+4,RCz					0.5	R0	1.7
Fibromyalgia	F2	75	200	1	75	C3+2	Cz+2	AC3,RC3+4 ACz+4,RCz					0.5	R0	1.7
Fibromyalgia	F2	75	200	1	75	C3+2	Cz+2	AC3,RC3+4 ACz+4,RCz					0.5	R0	1.7
Fibromyalgia	F2	10	200	1	5	C3 / Cz+4	C3+4 / Cz		250	100		500			0
Fibromyalgia	F2	30	200	1	5	C3 / Cz+4	C3+4 / Cz		250	100		500			0.5
Fibromyalgia	F2	50	200	1	5	C3 / Cz+4	C3+4 / Cz		250	100		500			1.7
Fibromyalgia	F2	50	200	1	15	C3 / Cz+4	C3+4 / Cz		250	100		500			1.8
Fibromyalgia	F2	25	200	1	15	C3 / Cz+4	C3+4 / Cz		250	100		500			1.3
Fibromyalgia	F2	5	200	1	15	C3 / Cz+4	C3+4 / Cz		250	100		500			0
Fibromyalgia	F2	15	200	1	15	C3 / Cz+4	C3+4 / Cz		250	100		500			0.5
Fibromyalgia	F2	25	200	1	15	C3 / Cz+4	C3+4 / Cz		250	100		500			1.4
Fibromyalgia	F2	20	200	1	5	C3(+2,-5)	Cz(+2,-5)		250	100		500			1.3
Fibromyalgia	F2	30	200	1	5	C3(+2,-5)	Cz(+2,-5)		250	100		500			1.5
Fibromyalgia	F2	35	200	1	5	C3(+2,-5)	Cz(+2,-5)		250	100		500			1.7
Fibromyalgia	F2	35	200	1	5	C3(+2,-5)	Cz(+2,-5)	AC3(0,-5),RC3(+4,-5) ACz(0,-5),RCz(+4,-5)	250	100		500	0.5	R0	1.7
Fibromyalgia	F2	35	200	1	15	C3(+2,-5)	Cz(+2,-5)	AC3(0,-5),RC3(+4,-5) ACz(0,-5),RCz(+4,-5)					0.5	R0	1.8
Fibromyalgia	F2	35	200	1	75	C3(+2,-5)	Cz(+2,-5)	AC3(0,-5),RC3(+4,-5) ACz(0,-5),RCz(+4,-5)					0.5	R0	2
Fibromyalgia	F2	30	200	1	75	C3(+2,-5)	Cz(+2,-5)	AC3(0,-5),RC3(+4,-5) ACz(0,-5),RCz(+4,-5)					0.5	R0	1.7
Fibromyalgia	F2	30	200	1	75	C3(+2,-5)	Cz(+2,-5)	AC3(0,-5),RC3(+4,-5) ACz(0,-5),RCz(+4,-5)					0.5	R0	1.7
Fibromyalgia	F2	30	200	1	75	C3(+2,-5)	Cz(+2,-5)	AC3(0,-5),RC3(+4,-5) ACz(0,-5),RCz(+4,-5)					0.5	R0	1.7
Fibromyalgia	F2	30	200	1	75	C3(+2,-5)	Cz(+2,-5)	AC3(0,-5),RC3(+4,-5) ACz(0,-5),RCz(+4,-5)					0.5	R0	1.65
Fibromyalgia	F2	30	200	1	75	C3(+2,-5)	Cz(+2,-5)	AC3(0,-5),RC3(+4,-5) ACz(0,-5),RCz(+4,-5)					0.5	R0	1.6
Fibromyalgia	F2	30	200	1	75	C3(+2,-5)	Cz(+2,-5)	AC3(0,-5),RC3(+4,-5) ACz(0,-5),RCz(+4,-5)					0.5	R0	1.6
Fibromyalgia	F2	30	200	1	75	C3(+2,-5)	Cz(+2,-5)	AC3(0,-5),RC3(+4,-5) ACz(0,-5),RCz(+4,-5)					0.5	R0	1.6
Fibromyalgia	F2	30	200	1	75	C3(+2,-5)	Cz(+2,-5)	AC3(0,-5),RC3(+4,-5) ACz(0,-5),RCz(+4,-5)					0.5	R0	1.6
Fibromyalgia	F2	30	200	1	75	C3(+2,-5)	Cz(+2,-5)	AC3(0,-5),RC3(+4,-5) ACz(0,-5),RCz(+4,-5)					0.5	R0	1.6
Fibromyalgia	F2	30	200	1	75	C3(+2,-5)	Cz(+2,-5)	AC3(0,-5),RC3(+4,-5) ACz(0,-5),RCz(+4,-5)					0.5	R0	1.6
Fibromyalgia	F2	30	200	1	75	C3(+2,-5)	Cz(+2,-5)	AC3(0,-5),RC3(+4,-5) ACz(0,-5),RCz(+4,-5)					0.5	R0	1.65
Fibromyalgia	F2	30	200	1	75	C3(+2,-5)	Cz(+2,-5)	AC3(0,-5),RC3(+4,-5) ACz(0,-5),RCz(+4,-5)					0.5	R0	1.6
Fibromyalgia	F2	30	200	1	75	C3(+2,-5)	Cz(+2,-5)	AC3(0,-5),RC3(+4,-5) ACz(0,-5),RCz(+4,-5)					0.5	R0	1.6
Box Behnken	NG	10	50	1	5	C3+2	Cz+2	Cz, Cz+4 / C3, C3+4							0
Box Behnken	NG	20	50	1	5	C3+2	Cz+2	Cz, Cz+4 / C3, C3+4							0
Box Behnken	NG	50	50	1	5	C3+2	Cz+2	Cz, Cz+4 / C3, C3+4							0.5
Box Behnken	NG	90	50	1	5	C3+2	Cz+2	Cz, Cz+4 / C3, C3+4							2
Box Behnken	NG	100	50	1	5	C3+2	Cz+2	Cz, Cz+4 / C3, C3+4							3
Box Behnken	NG	110	50	1	5	C3+2	Cz+2	Cz, Cz+4 / C3, C3+4							4
Box Behnken	NG	110	50	1	20	C3+2	Cz+2	Cz, Cz+4 / C3, C3+4							3.5
Box Behnken	NG	120	50	1	20	C3+2	Cz+2	Cz, Cz+4 / C3, C3+4							5
Box Behnken	NG	130	50	1	20	C3+2	Cz+2	Cz, Cz+4 / C3, C3+4							5
Box Behnken	NG	140	50	1	20	C3+2	Cz+2	Cz, Cz+4 / C3, C3+4							6
Box Behnken	NG	150	50	1	20	C3+2	Cz+2	Cz, Cz+4 / C3, C3+4							7
Box Behnken	NG	160	50	1	20	C3+2	Cz+2	Cz, Cz+4 / C3, C3+4							7
Box Behnken	NG	30	500	1	20	C3+2	Cz+2	Cz, Cz+4 / C3, C3+4							3
Box Behnken	NG	40	500	1	20	C3+2	Cz+2	Cz, Cz+4 / C3, C3+4							5
Box Behnken	NG	50	500	1	20	C3+2	Cz+2	Cz, Cz+4 / C3, C3+4							8
Box Behnken	NG	52	500	1	20	C3+2	Cz+2	Cz, Cz+4 / C3, C3+4							8
Box Behnken	NG	52	500	1	20	C3+2	Cz+2	Cz, Cz+4 / C3, C3+4	2.5	500	300	500	0.5		5
Box Behnken	NG	52	500	1	20	C3+2	Cz+2	Cz, Cz+4 / C3, C3+4	2.5	750	100	500	0.5		6
Box Behnken	NG	52	500	1	20	C3+2	Cz+2	Cz, Cz+4 / C3, C3+4	1	500	500	500	0.5		7.5
Box Behnken	NG	52	500	1	20	C3+2	Cz+2	Cz, Cz+4 / C3, C3+4	2.5	250	500	500	0.5		7
Box Behnken	NG	52	500	1	20	C3+2	Cz+2	Cz, Cz+4 / C3, C3+4	1	500	100	500	0.5		7.5
Box Behnken	NG	52	500	1	20	C3+2	Cz+2	Cz, Cz+4 / C3, C3+4	2.5	750	500	500	0.5		5.5
Box Behnken	NG	52	500	1	20	C3+2	Cz+2	Cz, Cz+4 / C3, C3+4	4	750	300	500	0.5		6
Box Behnken	NG	52	500	1	20	C3+2	Cz+2	Cz, Cz+4 / C3, C3+4	4	500	500	500	0.5		6
Box Behnken	NG	52	500	1	20	C3+2	Cz+2	Cz, Cz+4 / C3, C3+4	1	250	300	500	0.5		7.5
Box Behnken	NG	52	500	1	20	C3+2	Cz+2	Cz, Cz+4 / C3, C3+4	4	250	300	500	0.5		5.5
Box Behnken	NG	52	500	1	20	C3+2	Cz+2	Cz, Cz+4 / C3, C3+4	2.5	250	100	500	0.5		7.5
Box Behnken	NG	52	500	1	20	C3+2	Cz+2	Cz, Cz+4 / C3, C3+4	1	750	300	500	0.5		7
Box Behnken	NG	52	500	1	20	C3+2	Cz+2	Cz, Cz+4 / C3, C3+4	4	500	100	500	0.5		6
Box Behnken	NG	52	500	1	20	C3+2	Cz+2	Cz, Cz+4 / C3, C3+4							7
Box Behnken	NG	130	50	1	20	C3+2	Cz+2	Cz, Cz+4 / C3, C3+4							3
Box Behnken	NG	150	50	1	20	C3+2	Cz+2	Cz, Cz+4 / C3, C3+4							3
Box Behnken	NG	160	50	1	20	C3+2	Cz+2	Cz, Cz+4 / C3, C3+4							3
Box Behnken	NG	180	50	1	20	C3+2	Cz+2	Cz, Cz+4 / C3, C3+4							4
Box Behnken	NG	100	300	1	20	C3+2	Cz+2	Cz, Cz+4 / C3, C3+4							7.5
Box Behnken	NG	80	300	1	20	C3+2	Cz+2	Cz, Cz+4 / C3, C3+4							7
Box Behnken	NG	60	300	1	20	C3+2	Cz+2	Cz, Cz+4 / C3, C3+4							4.5
Box Behnken	NG	70	300	1	20	C3+2	Cz+2	Cz, Cz+4 / C3, C3+4							5
Box Behnken	NG	65	300	1	20	C3+2	Cz+2	Cz, Cz+4 / C3, C3+4	2.5	500	300	500	0.5		4
Box Behnken	NG	65	300	1	20	C3+2	Cz+2	Cz, Cz+4 / C3, C3+4	2.5	750	100	500	0.5		5
Box Behnken	NG	65	300	1	20	C3+2	Cz+2	Cz, Cz+4 / C3, C3+4	1	500	500	500	0.5		5.5
Box Behnken	NG	65	300	1	20	C3+2	Cz+2	Cz, Cz+4 / C3, C3+4	2.5	250	500	500	0.5		4.5
Box Behnken	NG	65	300	1	20	C3+2	Cz+2	Cz, Cz+4 / C3, C3+4	1	500	100	500	0.5		5
Box Behnken	NG	65	300	1	20	C3+2	Cz+2	Cz, Cz+4 / C3, C3+4	2.5	750	500	500	0.5		4.5
Box Behnken	NG	65	300	1	20	C3+2	Cz+2	Cz, Cz+4 / C3, C3+4	4	750	300	500	0.5		6
Box Behnken	NG	65	300	1	20	C3+2	Cz+2	Cz, Cz+4 / C3, C3+4	4	500	500	500	0.5		5
Box Behnken	NG	65	300	1	20	C3+2	Cz+2	Cz, Cz+4 / C3, C3+4	1	250	300	500	0.5		6
Box Behnken	NG	65	300	1	20	C3+2	Cz+2	Cz, Cz+4 / C3, C3+4	4	250	300	500	0.5		5
Box Behnken	NG	65	300	1	20	C3+2	Cz+2	Cz, Cz+4 / C3, C3+4	2.5	250	100	500	0.5		5.5
Box Behnken	NG	65	300	1	20	C3+2	Cz+2	Cz, Cz+4 / C3, C3+4	1	750	300	500	0.5		6
Box Behnken	NG	65	300	1	20	C3+2	Cz+2	Cz, Cz+4 / C3, C3+4	4	500	100	500	0.5		5.5
Box Behnken	NG	65	300	1	20	C3+2	Cz+2	Cz, Cz+4 / C3, C3+4							6
Box Behnken	NG	50	200	1	20	C3+2	Cz+2	Cz, Cz+4 / C3, C3+4							2
Box Behnken	NG	80	200	1	20	C3+2	Cz+2	Cz, Cz+4 / C3, C3+4							4.5
Box Behnken	NG	90	200	1	20	C3+2	Cz+2	Cz, Cz+4 / C3, C3+4							7
Box Behnken	NG	85	200	1	20	C3+2	Cz+2	Cz, Cz+4 / C3, C3+4							6
Box Behnken	NG	85	200	1	20	C3+2	Cz+2	Cz, Cz+4 / C3, C3+4	2.5	500	300	500	0.5		4
Box Behnken	NG	85	200	1	20	C3+2	Cz+2	Cz, Cz+4 / C3, C3+4	2.5	750	100	500	0.5		5
Box Behnken	NG	85	200	1	20	C3+2	Cz+2	Cz, Cz+4 / C3, C3+4	1	500	500	500	0.5		6
Box Behnken	NG	85	200	1	20	C3+2	Cz+2	Cz, Cz+4 / C3, C3+4	2.5	250	500	500	0.5		6
Box Behnken	NG	85	200	1	20	C3+2	Cz+2	Cz, Cz+4 / C3, C3+4	1	500	100	500	0.5		6
Box Behnken	NG	85	200	1	20	C3+2	Cz+2	Cz, Cz+4 / C3, C3+4	2.5	750	500	500	0.5		5
Box Behnken	NG	85	200	1	20	C3+2	Cz+2	Cz, Cz+4 / C3, C3+4	4	750	300	500	0.5		7
Box Behnken	NG	85	200	1	20	C3+2	Cz+2	Cz, Cz+4 / C3, C3+4	4	500	500	500	0.5		4.5
Box Behnken	NG	85	200	1	20	C3+2	Cz+2	Cz, Cz+4 / C3, C3+4	1	250	300	500	0.5		6
Box Behnken	NG	85	200	1	20	C3+2	Cz+2	Cz, Cz+4 / C3, C3+4	4	250	300	500	0.5		5
Box Behnken	NG	85	200	1	20	C3+2	Cz+2	Cz, Cz+4 / C3, C3+4	2.5	250	100	500	0.5		6
Box Behnken	NG	85	200	1	20	C3+2	Cz+2	Cz, Cz+4 / C3, C3+4	1	750	300	500	0.5		6
Box Behnken	NG	85	200	1	20	C3+2	Cz+2	Cz, Cz+4 / C3, C3+4	4	500	100	500	0.5		4.5
Box Behnken	NG	85	200	1	20	C3+2	Cz+2	Cz, Cz+4 / C3, C3+4							6
Box Behnken	NG	30	1000	1	20	C3+2	Cz+2	Cz, Cz+4 / C3, C3+4							3.5
Box Behnken	NG	37	1000	1	20	C3+2	Cz+2	Cz, Cz+4 / C3, C3+4							7
Box Behnken	NG	40	1000	1	20	C3+2	Cz+2	Cz, Cz+4 / C3, C3+4							8.5
Box Behnken	NG	43	1000	1	20	C3+2	Cz+2	Cz, Cz+4 / C3, C3+4							9
Box Behnken	NG	43	1000	1	20	C3+2	Cz+2	Cz, Cz+4 / C3, C3+4	2.5	500	300	500	0.5		7
Box Behnken	NG	43	1000	1	20	C3+2	Cz+2	Cz, Cz+4 / C3, C3+4	2.5	750	100	500	0.5		8
Box Behnken	NG	43	1000	1	20	C3+2	Cz+2	Cz, Cz+4 / C3, C3+4	1	500	500	500	0.5		9
Box Behnken	NG	43	1000	1	20	C3+2	Cz+2	Cz, Cz+4 / C3, C3+4	2.5	250	500	500	0.5		9
Box Behnken	NG	43	1000	1	20	C3+2	Cz+2	Cz, Cz+4 / C3, C3+4	1	500	100	500	0.5		9
Box Behnken	NG	43	1000	1	20	C3+2	Cz+2	Cz, Cz+4 / C3, C3+4	2.5	750	500	500	0.5		9
Box Behnken	NG	43	1000	1	20	C3+2	Cz+2	Cz, Cz+4 / C3, C3+4	4	750	300	500	0.5		9
Box Behnken	NG	43	1000	1	20	C3+2	Cz+2	Cz, Cz+4 / C3, C3+4	4	500	500	500	0.5		9
Box Behnken	NG	43	1000	1	20	C3+2	Cz+2	Cz, Cz+4 / C3, C3+4	1	250	300	500	0.5		9
Box Behnken	NG	43	1000	1	20	C3+2	Cz+2	Cz, Cz+4 / C3, C3+4	4	250	300	500	0.5		9
Box Behnken	NG	43	1000	1	20	C3+2	Cz+2	Cz, Cz+4 / C3, C3+4	2.5	250	100	500	0.5		9
Box Behnken	NG	43	1000	1	20	C3+2	Cz+2	Cz, Cz+4 / C3, C3+4	1	750	300	500	0.5		9
Box Behnken	NG	43	1000	1	20	C3+2	Cz+2	Cz, Cz+4 / C3, C3+4	4	500	100	500	0.5		8
Box Behnken	NG	43	1000	1	20	C3+2	Cz+2	Cz, Cz+4 / C3, C3+4							9
Box Behnken	NG	110	100	1	20	C3+2	Cz+2	Cz, Cz+4 / C3, C3+4							5
Box Behnken	NG	130	100	1	20	C3+2	Cz+2	Cz, Cz+4 / C3, C3+4							7
Box Behnken	NG	135	100	1	20	C3+2	Cz+2	Cz, Cz+4 / C3, C3+4							8
Box Behnken	NG	132	100	1	20	C3+2	Cz+2	Cz, Cz+4 / C3, C3+4							7.5
Box Behnken	NG	132	100	1	20	C3+2	Cz+2	Cz, Cz+4 / C3, C3+4	2.5	500	300	500	0.5		5
Box Behnken	NG	132	100	1	20	C3+2	Cz+2	Cz, Cz+4 / C3, C3+4	2.5	750	100	500	0.5		6
Box Behnken	NG	132	100	1	20	C3+2	Cz+2	Cz, Cz+4 / C3, C3+4	1	500	500	500	0.5		7.5
Box Behnken	NG	132	100	1	20	C3+2	Cz+2	Cz, Cz+4 / C3, C3+4	2.5	250	500	500	0.5		7
Box Behnken	NG	132	100	1	20	C3+2	Cz+2	Cz, Cz+4 / C3, C3+4	1	500	100	500	0.5		7.5
Box Behnken	NG	132	100	1	20	C3+2	Cz+2	Cz, Cz+4 / C3, C3+4	2.5	750	500	500	0.5		6
Box Behnken	NG	132	100	1	20	C3+2	Cz+2	Cz, Cz+4 / C3, C3+4	4	750	300	500	0.5		6.5
Box Behnken	NG	132	100	1	20	C3+2	Cz+2	Cz, Cz+4 / C3, C3+4	4	500	500	500	0.5		6
Box Behnken	NG	132	100	1	20	C3+2	Cz+2	Cz, Cz+4 / C3, C3+4	1	250	300	500	0.5		6.5
Box Behnken	NG	132	100	1	20	C3+2	Cz+2	Cz, Cz+4 / C3, C3+4	4	250	300	500	0.5		7
Box Behnken	NG	132	100	1	20	C3+2	Cz+2	Cz, Cz+4 / C3, C3+4	2.5	250	100	500	0.5		6.5
Box Behnken	NG	132	100	1	20	C3+2	Cz+2	Cz, Cz+4 / C3, C3+4	1	750	300	500	0.5		7
Box Behnken	NG	132	100	1	20	C3+2	Cz+2	Cz, Cz+4 / C3, C3+4	4	500	100	500	0.5		5.5
Box Behnken	NG	132	100	1	20	C3+2	Cz+2	Cz, Cz+4 / C3, C3+4							7
Box Behnken	P21	15	300	1	5	C3+2	Cz+2								3
Box Behnken	P21	25	300	1	5	C3+2	Cz+2								4
Box Behnken	P21	30	300	1	20	C3+2	Cz+2								5.5
Box Behnken	P21	30	300	1	20	C3+2	Cz+2								5.5
Box Behnken	P21	35	300	1	20	C3+2	Cz+2								6
Box Behnken	P21	35	300	1	20	C3+2	Cz+2	Cz, Cz+4 / C3, C3+4	1	750	300	500	0.5		3
Box Behnken	P21	35	300	1	20	C3+2	Cz+2	Cz, Cz+4 / C3, C3+4	1	500	100	500	0.5		3
Box Behnken	P21	35	300	1	20	C3+2	Cz+2	Cz, Cz+4 / C3, C3+4	4	250	300	500	0.5		2
Box Behnken	P21	35	300	1	20	C3+2	Cz+2	Cz, Cz+4 / C3, C3+4	1	500	500	500	0.5		5
Box Behnken	P21	35	300	1	20	C3+2	Cz+2	Cz, Cz+4 / C3, C3+4	4	500	100	500	0.5		4.5
Box Behnken	P21	35	300	1	20	C3+2	Cz+2	Cz, Cz+4 / C3, C3+4	2.5	750	500	500	0.5		3
Box Behnken	P21	35	300	1	20	C3+2	Cz+2	Cz, Cz+4 / C3, C3+4	4	500	500	500	0.5		6
Box Behnken	P21	35	300	1	20	C3+2	Cz+2	Cz, Cz+4 / C3, C3+4	2.5	500	300	500	0.5		4
Box Behnken	P21	35	300	1	20	C3+2	Cz+2	Cz, Cz+4 / C3, C3+4	2.5	250	500	500	0.5		5
Box Behnken	P21	35	300	1	20	C3+2	Cz+2	Cz, Cz+4 / C3, C3+4	2.5	750	100	500	0.5		3.5
Box Behnken	P21	35	300	1	20	C3+2	Cz+2	Cz, Cz+4 / C3, C3+4	2.5	250	100	500	0.5		5
Box Behnken	P21	35	300	1	20	C3+2	Cz+2	Cz, Cz+4 / C3, C3+4	1	250	300				5
Box Behnken	P21	35	300	1	20	C3+2	Cz+2								5
Box Behnken	P21	35	200	1	20	C3+2	Cz+2								4
Box Behnken	P21	40	200	1	20	C3+2	Cz+2								3.8
Box Behnken	P21	45	200	1	20	C3+2	Cz+2								3.8
Box Behnken	P21	45	200	1	20	C3+2	Cz+2	Cz, Cz+4 / C3, C3+4	1	750	300	500	0.5		4
Box Behnken	P21	45	200	1	20	C3+2	Cz+2	Cz, Cz+4 / C3, C3+4	1	500	100	500	0.5		5
Box Behnken	P21	45	200	1	20	C3+2	Cz+2	Cz, Cz+4 / C3, C3+4	4	250	300	500	0.5		1.5
Box Behnken	P21	45	200	1	20	C3+2	Cz+2	Cz, Cz+4 / C3, C3+4	1	500	500	500	0.5		4.5
Box Behnken	P21	45	200	1	20	C3+2	Cz+2	Cz, Cz+4 / C3, C3+4	2.5	750	500	500	0.5		3
Box Behnken	P21	45	200	1	20	C3+2	Cz+2	Cz, Cz+4 / C3, C3+4	4	500	500	500	0.5		3
Box Behnken	P21	45	200	1	20	C3+2	Cz+2	Cz, Cz+4 / C3, C3+4	2.5	500	300	500	0.5		2
Box Behnken	P21	45	200	1	20	C3+2	Cz+2	Cz, Cz+4 / C3, C3+4	2.5	250	500	500	0.5		3
Box Behnken	P21	45	200	1	20	C3+2	Cz+2	Cz, Cz+4 / C3, C3+4	2.5	750	100	500	0.5		2
Box Behnken	P21	45	200	1	20	C3+2	Cz+2	Cz, Cz+4 / C3, C3+4	2.5	250	100	500	0.5		3
Box Behnken	P21	45	200	1	20	C3+2	Cz+2	Cz, Cz+4 / C3, C3+4	1	250	300	500	0.5		4
Box Behnken	P21	45	200	1	20	C3+2	Cz+2								4
Box Behnken	P21	23	500	1	20	C3+2	Cz+2								3
Box Behnken	P21	26	500	1	20	C3+2	Cz+2								2
Box Behnken	P21	28	500	1	20	C3+2	Cz+2								2
Box Behnken	P21	28	500	1	20	C3+2	Cz+2	Cz, Cz+4 / C3, C3+4	1	750	300	500	0.5		2
Box Behnken	P21	28	500	1	20	C3+2	Cz+2	Cz, Cz+4 / C3, C3+4	1	500	100	500	0.5		3
Box Behnken	P21	28	500	1	20	C3+2	Cz+2	Cz, Cz+4 / C3, C3+4	4	250	300	500	0.5		1
Box Behnken	P21	28	500	1	20	C3+2	Cz+2	Cz, Cz+4 / C3, C3+4	1	500	500	500	0.5		3
Box Behnken	P21	28	500	1	20	C3+2	Cz+2	Cz, Cz+4 / C3, C3+4	2.5	500	300	500	0.5		2
Box Behnken	P21	28	500	1	20	C3+2	Cz+2	Cz, Cz+4 / C3, C3+4	2.5	250	500	500	0.5		2
Box Behnken	P21	28	500	1	20	C3+2	Cz+2	Cz, Cz+4 / C3, C3+4	2.5	250	100	500	0.5		2
Box Behnken	P21	28	500	1	20	C3+2	Cz+2	Cz, Cz+4 / C3, C3+4	1	250	300	500	0.5		2
Box Behnken	P21	28	500	1	20	C3+2	Cz+2								2.5
Box Behnken	P21	70	100	1	20	C3+2	Cz+2								4
Box Behnken	P21	80	100	1	20	C3+2	Cz+2								5
Box Behnken	P21	75	100	1	20	C3+2	Cz+2								4
Box Behnken	P21	75	100	1	20	C3+2	Cz+2	Cz, Cz+4 / C3, C3+4	1	750	300	500	0.5		3
Box Behnken	P21	75	100	1	20	C3+2	Cz+2	Cz, Cz+4 / C3, C3+4	1	500	100	500	0.5		3
Box Behnken	P21	75	100	1	20	C3+2	Cz+2	Cz, Cz+4 / C3, C3+4	4	250	300	500	0.5		0
Box Behnken	P21	75	100	1	20	C3+2	Cz+2	Cz, Cz+4 / C3, C3+4	1	500	500	500	0.5		3
Box Behnken	P21	75	100	1	20	C3+2	Cz+2	Cz, Cz+4 / C3, C3+4	4	500	100	500	0.5		0
Box Behnken	P21	75	100	1	20	C3+2	Cz+2	Cz, Cz+4 / C3, C3+4	2.5	750	500	500	0.5		2
Box Behnken	P21	75	100	1	20	C3+2	Cz+2	Cz, Cz+4 / C3, C3+4	4	500	500	500	0.5		0
Box Behnken	P21	75	100	1	20	C3+2	Cz+2	Cz, Cz+4 / C3, C3+4	2.5	500	300	500	0.5		3
Box Behnken	P21	75	100	1	20	C3+2	Cz+2	Cz, Cz+4 / C3, C3+4	2.5	250	500	500	0.5		2
Box Behnken	P21	75	100	1	20	C3+2	Cz+2	Cz, Cz+4 / C3, C3+4	2.5	750	100	500	0.5		0
Box Behnken	P21	75	100	1	20	C3+2	Cz+2	Cz, Cz+4 / C3, C3+4	2.5	250	100	500	0.5		4
Box Behnken	P21	75	100	1	20	C3+2	Cz+2	Cz, Cz+4 / C3, C3+4	4	750	300	500	0.5		0
Box Behnken	P21	75	100	1	20	C3+2	Cz+2	Cz, Cz+4 / C3, C3+4	1	250	300	500	0.5		3
Box Behnken	P21	75	100	1	20	C3+2	Cz+2								3
Box Behnken	P13	20	100	1	5	C3+2	Cz+2								1
Box Behnken	P13	35	100	1	5	C3+2	Cz+2								2
Box Behnken	P13	50	100	1	5	C3+2	Cz+2								3
Box Behnken	P13	65	100	1	5	C3+2	Cz+2								3.5
Box Behnken	P13	80	100	1	20	C3+2	Cz+2								5.5
Box Behnken	P13	85	100	1	20	C3+2	Cz+2								6.5
Box Behnken	P13	90	100	1	20	C3+2	Cz+2								6.5
Box Behnken	P13	85	100	1	20	C3(+2,-1)	Cz(+2,-1)								6.5
Box Behnken	P13	90	100	1	20	C3(+2,-1)	Cz(+2,-1)								6.5
Box Behnken	P13	85	100	1	20	C3(+3,-1)	Cz(+2,-1)								5
Box Behnken	P13	90	100	1	20	C3(+3,-1)	Cz(+2,-1)								6
Box Behnken	P13	95	100	1	20	C3(+3,-1)	Cz(+2,-1)								6.6
Box Behnken	P13	100	100	1	20	C3(+3,-1)	Cz(+2,-1)								6.3
Box Behnken	P13	50	200	1	5	C3(+3,-1)	Cz(+2,-1)								4
Box Behnken	P13	60	200	1	20	C3(+3,-1)	Cz(+2,-1)								5
Box Behnken	P13	65	200	1	20	C3(+3,-1)	Cz(+2,-1)								5
Box Behnken	P13	65	200	1	20	C3+2	Cz+2								6
Box Behnken	P13	60	200	1	20	C3+2	Cz+2								6
Box Behnken	P13	55	200	1	20	C3+2	Cz+2								5.5
Box Behnken	P13	60	200	1	20	C3+2	Cz+2	Cz, Cz+4 / C3, C3+4	4	750	300	500	0.5		3
Box Behnken	P13	60	200	1	20	C3+2	Cz+2	Cz, Cz+4 / C3, C3+4	4	250	300	500	0.5		4
Box Behnken	P13	60	200	1	20	C3+2	Cz+2	Cz, Cz+4 / C3, C3+4	2.5	250	100	500	0.5		5.5
Box Behnken	P13	60	200	1	20	C3+2	Cz+2	Cz, Cz+4 / C3, C3+4	4	500	100	500	0.5		4
Box Behnken	P13	60	200	1	20	C3+2	Cz+2	Cz, Cz+4 / C3, C3+4	1	500	100	500	0.5		5.7
Box Behnken	P13	60	200	1	20	C3+2	Cz+2	Cz, Cz+4 / C3, C3+4	1	750	300	500	0.5		5.7
Box Behnken	P13	60	200	1	20	C3+2	Cz+2	Cz, Cz+4 / C3, C3+4	2.5	750	500	500	0.5		4
Box Behnken	P13	60	200	1	20	C3+2	Cz+2	Cz, Cz+4 / C3, C3+4	4	500	500	500	0.5		4
Box Behnken	P13	60	200	1	20	C3+2	Cz+2	Cz, Cz+4 / C3, C3+4	2.5	250	500	500	0.5		5
Box Behnken	P13	60	200	1	20	C3+2	Cz+2	Cz, Cz+4 / C3, C3+4	2.5	500	300	500	0.5		5.5
Box Behnken	P13	60	200	1	20	C3+2	Cz+2	Cz, Cz+4 / C3, C3+4	1	250	300	500	0.5		5.5
Box Behnken	P13	60	200	1	20	C3+2	Cz+2	Cz, Cz+4 / C3, C3+4	1	500	500	500	0.5		5.5
Box Behnken	P13	60	200	1	20	C3+2	Cz+2	Cz, Cz+4 / C3, C3+4	2.5	750	100	500	0.5		4
Box Behnken	P13	60	200	1	20	C3+2	Cz+2								5.5
Box Behnken	P13	40	500	1	20	C3+2	Cz+2								5.5
Box Behnken	P13	40	500	1	20	C3+2	Cz+2	Cz, Cz+4 / C3, C3+4	4	750	300	500	0.5		3.5
Box Behnken	P13	40	500	1	20	C3+2	Cz+2	Cz, Cz+4 / C3, C3+4	4	250	300	500	0.5		3.5
Box Behnken	P13	40	500	1	20	C3+2	Cz+2	Cz, Cz+4 / C3, C3+4	2.5	250	100	500	0.5		4.7
Box Behnken	P13	40	500	1	20	C3+2	Cz+2	Cz, Cz+4 / C3, C3+4	4	500	100	500	0.5		4.5
Box Behnken	P13	40	500	1	20	C3+2	Cz+2	Cz, Cz+4 / C3, C3+4	1	500	100	500	0.5		5.5
Box Behnken	P13	40	500	1	20	C3+2	Cz+2	Cz, Cz+4 / C3, C3+4	1	750	300	500	0.5		5.5
Box Behnken	P13	40	500	1	20	C3+2	Cz+2	Cz, Cz+4 / C3, C3+4	2.5	750	500	500	0.5		4.5
Box Behnken	P13	40	500	1	20	C3+2	Cz+2	Cz, Cz+4 / C3, C3+4	4	500	500	500	0.5		4.3
Box Behnken	P13	40	500	1	20	C3+2	Cz+2	Cz, Cz+4 / C3, C3+4	2.5	250	500	500	0.5		5.6
Box Behnken	P13	40	500	1	20	C3+2	Cz+2	Cz, Cz+4 / C3, C3+4	2.5	500	300	500	0.5		5.6
Box Behnken	P13	40	500	1	20	C3+2	Cz+2	Cz, Cz+4 / C3, C3+4	1	250	300	500	0.5		5.5
Box Behnken	P13	40	500	1	20	C3+2	Cz+2	Cz, Cz+4 / C3, C3+4	1	500	500	500	0.5		5.5
Box Behnken	P13	40	500	1	20	C3+2	Cz+2	Cz, Cz+4 / C3, C3+4	2.5	750	100	500	0.5		5.7
Box Behnken	P13	40	500	1	20	C3+2	Cz+2								5.6
Box Behnken	P13	45	300	1	20	C3+2	Cz+2								5.7
Box Behnken	P13	50	300	1	20	C3+2	Cz+2								6
Box Behnken	P13	50	300	1	20	C3+2	Cz+2	Cz, Cz+4 / C3, C3+4	4	750	300	500	0.5		4.7
Box Behnken	P13	50	300	1	20	C3+2	Cz+2	Cz, Cz+4 / C3, C3+4	4	250	300	500	0.5		5
Box Behnken	P13	50	300	1	20	C3+2	Cz+2	Cz, Cz+4 / C3, C3+4	2.5	250	100	500	0.5		5
Box Behnken	P13	50	300	1	20	C3+2	Cz+2	Cz, Cz+4 / C3, C3+4	4	500	100	500	0.5		4.5
Box Behnken	P13	50	300	1	20	C3+2	Cz+2	Cz, Cz+4 / C3, C3+4	1	500	100	500	0.5		5.6
Box Behnken	P13	50	300	1	20	C3+2	Cz+2	Cz, Cz+4 / C3, C3+4	1	750	300	500	0.5		5.6
Box Behnken	P13	50	300	1	20	C3+2	Cz+2	Cz, Cz+4 / C3, C3+4	2.5	750	500	500	0.5		4.2
Box Behnken	P13	50	300	1	20	C3+2	Cz+2	Cz, Cz+4 / C3, C3+4	4	500	500	500	0.5		5.7
Box Behnken	P13	50	300	1	20	C3+2	Cz+2	Cz, Cz+4 / C3, C3+4	2.5	250	500	500	0.5		5.7
Box Behnken	P13	50	300	1	20	C3+2	Cz+2	Cz, Cz+4 / C3, C3+4	2.5	500	300	500	0.5		6
Box Behnken	P13	50	300	1	20	C3+2	Cz+2	Cz, Cz+4 / C3, C3+4	1	250	300	500	0.5		5.6
Box Behnken	P13	50	300	1	20	C3+2	Cz+2	Cz, Cz+4 / C3, C3+4	1	500	500	500	0.5		5.6
Box Behnken	P13	50	300	1	20	C3+2	Cz+2	Cz, Cz+4 / C3, C3+4	2.5	750	100	500	0.5		5.2
Box Behnken	P13	50	300	1	20	C3+2	Cz+2								5.8
Box Behnken	P13	85	100	1	20	C3+2	Cz+2								5.6
Box Behnken	P13	90	100	1	20	C3+2	Cz+2								6.3
Box Behnken	P13	90	100	1	20	C3+2	Cz+2	Cz, Cz+4 / C3, C3+4	4	750	300	500	0.5		4.5
Box Behnken	P13	90	100	1	20	C3+2	Cz+2	Cz, Cz+4 / C3, C3+4	4	250	300	500	0.5		4.5
Box Behnken	P13	90	100	1	20	C3+2	Cz+2	Cz, Cz+4 / C3, C3+4	2.5	250	100	500	0.5		6.3
Box Behnken	P13	90	100	1	20	C3+2	Cz+2	Cz, Cz+4 / C3, C3+4	4	500	100	500	0.5		5
Box Behnken	P13	90	100	1	20	C3+2	Cz+2	Cz, Cz+4 / C3, C3+4	1	500	100	500	0.5		6.3
Box Behnken	P13	90	100	1	20	C3+2	Cz+2	Cz, Cz+4 / C3, C3+4	1	750	300	500	0.5		6.5
Box Behnken	P13	90	100	1	20	C3+2	Cz+2	Cz, Cz+4 / C3, C3+4	2.5	750	500	500	0.5		4.7
Box Behnken	P13	90	100	1	20	C3+2	Cz+2	Cz, Cz+4 / C3, C3+4	4	500	500	500	0.5		5
Box Behnken	P13	90	100	1	20	C3+2	Cz+2	Cz, Cz+4 / C3, C3+4	2.5	250	500	500	0.5		6.5
Box Behnken	P13	90	100	1	20	C3+2	Cz+2	Cz, Cz+4 / C3, C3+4	2.5	500	300	500	0.5		5.5
Box Behnken	P13	90	100	1	20	C3+2	Cz+2	Cz, Cz+4 / C3, C3+4	1	250	300	500	0.5		6
Box Behnken	P13	90	100	1	20	C3+2	Cz+2	Cz, Cz+4 / C3, C3+4	1	500	500	500	0.5		6.3
Box Behnken	P13	90	100	1	20	C3+2	Cz+2	Cz, Cz+4 / C3, C3+4	2.5	750	100	500	0.5		5.3
Box Behnken	P13	90	100	1	20	C3+2	Cz+2								6
Box Behnken	P12	10	300	1	5	C3+2	Cz+2								0.5
Box Behnken	P12	25	300	1	5	C3+2	Cz+2								1.5
Box Behnken	P12	45	300	1	5	C3+2	Cz+2								2.5
Box Behnken	P12	65	300	1	5	C3+2	Cz+2								4
Box Behnken	P12	70	300	1	20	C3+2	Cz+2								5
Box Behnken	P12	75	300	1	20	C3+2	Cz+2								5.5
Box Behnken	P12	75	300	1	20	C3+2	Cz+2	Cz, Cz+4 / C3, C3+4	2.5	500	300	500	0.5		4.5
Box Behnken	P12	75	300	1	20	C3+2	Cz+2	Cz, Cz+4 / C3, C3+4	1	750	300	500	0.5		5.5
Box Behnken	P12	75	300	1	20	C3+2	Cz+2	Cz, Cz+4 / C3, C3+4	2.5	250	500	500	0.5		5.5
Box Behnken	P12	75	300	1	20	C3+2	Cz+2	Cz, Cz+4 / C3, C3+4	1	500	500	500	0.5		6
Box Behnken	P12	75	300	1	20	C3+2	Cz+2	Cz, Cz+4 / C3, C3+4	2.5	750	100	500	0.5		4.5
Box Behnken	P12	75	300	1	20	C3+2	Cz+2	Cz, Cz+4 / C3, C3+4	4	500	500	500	0.5		2.5
Box Behnken	P12	75	300	1	20	C3+2	Cz+2	Cz, Cz+4 / C3, C3+4	2.5	250	100	500	0.5		4.5
Box Behnken	P12	75	300	1	20	C3+2	Cz+2	Cz, Cz+4 / C3, C3+4	4	250	300	500	0.5		4
Box Behnken	P12	75	300	1	20	C3+2	Cz+2	Cz, Cz+4 / C3, C3+4	4	500	100	500	0.5		4.5
Box Behnken	P12	75	300	1	20	C3+2	Cz+2	Cz, Cz+4 / C3, C3+4	4	750	300	500	0.5		3
Box Behnken	P12	75	300	1	20	C3+2	Cz+2	Cz, Cz+4 / C3, C3+4	1	500	100	500	0.5		5
Box Behnken	P12	75	300	1	20	C3+2	Cz+2	Cz, Cz+4 / C3, C3+4	1	250	300	500	0.5		5
Box Behnken	P12	75	300	1	20	C3+2	Cz+2	Cz, Cz+4 / C3, C3+4	2.5	750	500	500	0.5		4
Box Behnken	P12	75	300	1	20	C3+2	Cz+2								5.5
Box Behnken	P12	40	100	1	5	C3+2	Cz+2								0.5
Box Behnken	P12	80	100	1	5	C3+2	Cz+2								1
Box Behnken	P12	110	100	1	5	C3+2	Cz+2								2
Box Behnken	P12	110	100	1	20	C3+2	Cz+2								3.5
Box Behnken	P12	120	100	1	20	C3+2	Cz+2								3.5
Box Behnken	P12	130	100	1	20	C3+2	Cz+2								3.5
Box Behnken	P12	140	100	1	20	C3+2	Cz+2								4
Box Behnken	P12	150	100	1	20	C3+2	Cz+2								5
Box Behnken	P12	150	100	1	20	C3+2	Cz+2	Cz, Cz+4 / C3, C3+4	2.5	500	300	500	0.5		4
Box Behnken	P12	150	100	1	20	C3+2	Cz+2	Cz, Cz+4 / C3, C3+4	1	750	300	500	0.5		5
Box Behnken	P12	150	100	1	20	C3+2	Cz+2	Cz, Cz+4 / C3, C3+4	2.5	250	500	500	0.5		5
Box Behnken	P12	150	100	1	20	C3+2	Cz+2	Cz, Cz+4 / C3, C3+4	1	500	500	500	0.5		5
Box Behnken	P12	150	100	1	20	C3+2	Cz+2	Cz, Cz+4 / C3, C3+4	2.5	750	100	500	0.5		4
Box Behnken	P12	150	100	1	20	C3+2	Cz+2	Cz, Cz+4 / C3, C3+4	4	500	500	500	0.5		2.5
Box Behnken	P12	150	100	1	20	C3+2	Cz+2	Cz, Cz+4 / C3, C3+4	2.5	250	100	500	0.5		5
Box Behnken	P12	150	100	1	20	C3+2	Cz+2	Cz, Cz+4 / C3, C3+4	4	250	300	500	0.5		4
Box Behnken	P12	150	100	1	20	C3+2	Cz+2	Cz, Cz+4 / C3, C3+4	4	500	100	500	0.5		3
Box Behnken	P12	150	100	1	20	C3+2	Cz+2	Cz, Cz+4 / C3, C3+4	4	750	300	500	0.5		2
Box Behnken	P12	150	100	1	20	C3+2	Cz+2	Cz, Cz+4 / C3, C3+4	1	500	100	500	0.5		4.8
Box Behnken	P12	150	100	1	20	C3+2	Cz+2	Cz, Cz+4 / C3, C3+4	1	250	300	500	0.5		4.2
Box Behnken	P12	150	100	1	20	C3+2	Cz+2	Cz, Cz+4 / C3, C3+4	2.5	750	500	500	0.5		3
Box Behnken	P12	150	100	1	20	C3+2	Cz+2								4.5
Box Behnken	P12	60	200	1	5	C3+2	Cz+2								0.5
Box Behnken	P12	80	200	1	5	C3+2	Cz+2								1
Box Behnken	P12	90	200	1	20	C3+2	Cz+2								2
Box Behnken	P12	100	200	1	20	C3+2	Cz+2								2.5
Box Behnken	P12	95	200	1	20	C3+2	Cz+2	Cz, Cz+4 / C3, C3+4	2.5	500	300	500	0.5		1
Box Behnken	P12	95	200	1	20	C3+2	Cz+2	Cz, Cz+4 / C3, C3+4	1	750	300	500	0.5		3.5
Box Behnken	P12	95	200	1	20	C3+2	Cz+2	Cz, Cz+4 / C3, C3+4	2.5	250	500	500	0.5		3.5
Box Behnken	P12	95	200	1	20	C3+2	Cz+2	Cz, Cz+4 / C3, C3+4	1	500	500	500	0.5		3.5
Box Behnken	P12	95	200	1	20	C3+2	Cz+2	Cz, Cz+4 / C3, C3+4	2.5	750	100	500	0.5		2
Box Behnken	P12	95	200	1	20	C3+2	Cz+2	Cz, Cz+4 / C3, C3+4	4	500	500	500	0.5		1
Box Behnken	P12	95	200	1	20	C3+2	Cz+2	Cz, Cz+4 / C3, C3+4	2.5	250	100	500	0.5		3.5
Box Behnken	P12	95	200	1	20	C3+2	Cz+2	Cz, Cz+4 / C3, C3+4	4	250	300	500	0.5		2
Box Behnken	P12	95	200	1	20	C3+2	Cz+2	Cz, Cz+4 / C3, C3+4	4	500	100	500	0.5		1.2
Box Behnken	P12	95	200	1	20	C3+2	Cz+2	Cz, Cz+4 / C3, C3+4	4	750	300	500	0.5		0.5
Box Behnken	P12	95	200	1	20	C3+2	Cz+2	Cz, Cz+4 / C3, C3+4	1	500	100	500	0.5		3
Box Behnken	P12	95	200	1	20	C3+2	Cz+2	Cz, Cz+4 / C3, C3+4	1	250	300	500	0.5		3
Box Behnken	P12	95	200	1	20	C3+2	Cz+2	Cz, Cz+4 / C3, C3+4	2.5	750	500	500	0.5		2.5
Box Behnken	P12	95	200	1	20	C3+2	Cz+2								3
Box Behnken	P12	25	500	1	5	C3+2	Cz+2								0.5
Box Behnken	P12	40	500	1	5	C3+2	Cz+2								1
Box Behnken	P12	45	500	1	20	C3+2	Cz+2								1.5
Box Behnken	P12	50	500	1	20	C3+2	Cz+2								2.5
Box Behnken	P12	55	500	1	20	C3+2	Cz+2								3
Box Behnken	P12	60	500	1	20	C3+2	Cz+2								3.5
Box Behnken	P12	60	500	1	20	C3+2	Cz+2	Cz, Cz+4 / C3, C3+4	2.5	500	300	500	0.5		2
Box Behnken	P12	60	500	1	20	C3+2	Cz+2	Cz, Cz+4 / C3, C3+4	1	750	300	500	0.5		3.5
Box Behnken	P12	60	500	1	20	C3+2	Cz+2	Cz, Cz+4 / C3, C3+4	2.5	250	500	500	0.5		3.4
Box Behnken	P12	60	500	1	20	C3+2	Cz+2	Cz, Cz+4 / C3, C3+4	1	500	500	500	0.5		4
Box Behnken	P12	60	500	1	20	C3+2	Cz+2	Cz, Cz+4 / C3, C3+4	2.5	750	100	500	0.5		2.5
Box Behnken	P12	60	500	1	20	C3+2	Cz+2	Cz, Cz+4 / C3, C3+4	4	500	500	500	0.5		0.5
Box Behnken	P12	60	500	1	20	C3+2	Cz+2	Cz, Cz+4 / C3, C3+4	2.5	250	100	500	0.5		4
Box Behnken	P12	60	500	1	20	C3+2	Cz+2	Cz, Cz+4 / C3, C3+4	4	250	300	500	0.5		2.5
Box Behnken	P12	60	500	1	20	C3+2	Cz+2	Cz, Cz+4 / C3, C3+4	4	500	100	500	0.5		1
[truncated: 935 more rows]
